# Supplementary material for: International virtual confidential reviews of infection-related maternal deaths and near-miss in 11 low- and middle-income countries – case report series and suggested actions
Source: Springer Nature journal article supplement (doi:10.1186/s12884-022-04731-x), 2022-05-23
Supplement: MOESM1 [file 22766794]

## **Supplementary appendix**

International virtual confidential reviews of infection-related maternal deaths and near-miss in 11 low- and middle-income countries – Case report series and suggested actions

# Supplementary Material

Figure S1: GLOSS maternal death and near-miss data collection form

|  <b>World Health Organization</b>                                                                                                                                                                                                                                                                                                                                                                                                                                                                                                                                                                                                                                                                                                                                                                                                                                                                                                                                                                                                                                                                                                                                                                                                                                                                                                                                                                                                                                                                                                                                                                                                                                                                                                                                                                                                                                                                                                                                                                                                                                                                                                                                                                                                                                                                                                                                                                                                                                                                                                                                                                                                                                                                                                                                                                                                                                                                                                                                                                                                                                                                                                                                                                                                                                                                                                                                                                                                                                                                                                                                                                                                                                                                                                                                                                                                                                                                                                                                                                                                                                                                                                                                                                                                                                                                                                                                                                                                                                                                                                                                                                                                                                                                                                                                                                                                                                                                                                                                                                                                                                                                                                                                                                                                                                                                                                                                                                                                                                                                                                                                                        | <b>GLOBAL MATERNAL SEPSIS STUDY - DEATHS AND NEARMISS</b><br><b>INDIVIDUAL FORM</b><br><small>ALL MATERNAL DEATHS AND NEARMISS WITH INFECTION INCLUDED IN THE STUDY</small><br><small>Section A &amp; B Care before/during admission (March 2019 - page 1/8)</small> | <br><small>Global Maternal Sepsis Study</small>        |                          |   |   |   |  |  |  |  |  |  |  |         |    |     |                                                  |                          |                          |                          |                               |                          |                          |                          |                      |                          |                          |                          |               |                          |                          |                          |            |                          |                          |                          |                       |                          |                          |                          |                      |                          |                          |                          |             |                          |                          |                          |                                      |                          |                          |                          |                            |                          |                          |                          |            |                          |                          |                          |                    |                          |                          |                          |  |         |    |     |                |                          |                          |                          |                |                          |                          |                          |               |                          |                          |                          |                  |                          |                          |                          |                                                                                                                                                                                                                                                                                                                                                                                                                                                                                                                                                                                                                                                                                                                                                                                                                                                                                                                                                                                                                                                                                                                                                                                                                                                                                                                                                                                                                                                                                                                                                                                                                                                                                                                                                                                                                                                                                                                                                                                                                                                                                                                                                                                                                                                                                                                                                                                                                                                                                                                                                                                                                                                                                                                                                                                                                                                                                                                                                                                                                                                                                                                                                                                                                                                                                                                                                                                                                                                                                                                                                                                                                                                                                                                                                                                                                                                                                                                                                                                                                                                                                                                                                                                                                                                                                                                                                                                                                                                                                                                                                                                                                                                                                                                            |   |   |   |   |   |   |  |  |  |  |  |  |   |   |   |   |   |   |  |  |  |  |  |  |   |   |   |   |   |   |  |  |  |  |  |  |   |   |   |   |  |  |  |  |  |         |    |     |                        |                          |                          |                          |                 |                          |                          |                          |                                      |                          |                          |                          |   |   |   |   |   |   |  |  |  |  |  |  |   |   |   |   |  |  |  |  |                     |                          |                     |                          |                                     |                          |                                |                          |                                         |                          |                            |                          |                                              |                          |            |                          |
|---------------------------------------------------------------------------------------------------------------------------------------------------------------------------------------------------------------------------------------------------------------------------------------------------------------------------------------------------------------------------------------------------------------------------------------------------------------------------------------------------------------------------------------------------------------------------------------------------------------------------------------------------------------------------------------------------------------------------------------------------------------------------------------------------------------------------------------------------------------------------------------------------------------------------------------------------------------------------------------------------------------------------------------------------------------------------------------------------------------------------------------------------------------------------------------------------------------------------------------------------------------------------------------------------------------------------------------------------------------------------------------------------------------------------------------------------------------------------------------------------------------------------------------------------------------------------------------------------------------------------------------------------------------------------------------------------------------------------------------------------------------------------------------------------------------------------------------------------------------------------------------------------------------------------------------------------------------------------------------------------------------------------------------------------------------------------------------------------------------------------------------------------------------------------------------------------------------------------------------------------------------------------------------------------------------------------------------------------------------------------------------------------------------------------------------------------------------------------------------------------------------------------------------------------------------------------------------------------------------------------------------------------------------------------------------------------------------------------------------------------------------------------------------------------------------------------------------------------------------------------------------------------------------------------------------------------------------------------------------------------------------------------------------------------------------------------------------------------------------------------------------------------------------------------------------------------------------------------------------------------------------------------------------------------------------------------------------------------------------------------------------------------------------------------------------------------------------------------------------------------------------------------------------------------------------------------------------------------------------------------------------------------------------------------------------------------------------------------------------------------------------------------------------------------------------------------------------------------------------------------------------------------------------------------------------------------------------------------------------------------------------------------------------------------------------------------------------------------------------------------------------------------------------------------------------------------------------------------------------------------------------------------------------------------------------------------------------------------------------------------------------------------------------------------------------------------------------------------------------------------------------------------------------------------------------------------------------------------------------------------------------------------------------------------------------------------------------------------------------------------------------------------------------------------------------------------------------------------------------------------------------------------------------------------------------------------------------------------------------------------------------------------------------------------------------------------------------------------------------------------------------------------------------------------------------------------------------------------------------------------------------------------------------------------------------------------------------------------------------------------------------------------------------------------------------------------------------------------------------------------------------------------------------------------------------------------------------------------------------------------------------------------------------------------|----------------------------------------------------------------------------------------------------------------------------------------------------------------------------------------------------------------------------------------------------------------------|-------------------------------------------------------------------------------------------------------------------------------------------|--------------------------|---|---|---|--|--|--|--|--|--|--|---------|----|-----|--------------------------------------------------|--------------------------|--------------------------|--------------------------|-------------------------------|--------------------------|--------------------------|--------------------------|----------------------|--------------------------|--------------------------|--------------------------|---------------|--------------------------|--------------------------|--------------------------|------------|--------------------------|--------------------------|--------------------------|-----------------------|--------------------------|--------------------------|--------------------------|----------------------|--------------------------|--------------------------|--------------------------|-------------|--------------------------|--------------------------|--------------------------|--------------------------------------|--------------------------|--------------------------|--------------------------|----------------------------|--------------------------|--------------------------|--------------------------|------------|--------------------------|--------------------------|--------------------------|--------------------|--------------------------|--------------------------|--------------------------|--|---------|----|-----|----------------|--------------------------|--------------------------|--------------------------|----------------|--------------------------|--------------------------|--------------------------|---------------|--------------------------|--------------------------|--------------------------|------------------|--------------------------|--------------------------|--------------------------|----------------------------------------------------------------------------------------------------------------------------------------------------------------------------------------------------------------------------------------------------------------------------------------------------------------------------------------------------------------------------------------------------------------------------------------------------------------------------------------------------------------------------------------------------------------------------------------------------------------------------------------------------------------------------------------------------------------------------------------------------------------------------------------------------------------------------------------------------------------------------------------------------------------------------------------------------------------------------------------------------------------------------------------------------------------------------------------------------------------------------------------------------------------------------------------------------------------------------------------------------------------------------------------------------------------------------------------------------------------------------------------------------------------------------------------------------------------------------------------------------------------------------------------------------------------------------------------------------------------------------------------------------------------------------------------------------------------------------------------------------------------------------------------------------------------------------------------------------------------------------------------------------------------------------------------------------------------------------------------------------------------------------------------------------------------------------------------------------------------------------------------------------------------------------------------------------------------------------------------------------------------------------------------------------------------------------------------------------------------------------------------------------------------------------------------------------------------------------------------------------------------------------------------------------------------------------------------------------------------------------------------------------------------------------------------------------------------------------------------------------------------------------------------------------------------------------------------------------------------------------------------------------------------------------------------------------------------------------------------------------------------------------------------------------------------------------------------------------------------------------------------------------------------------------------------------------------------------------------------------------------------------------------------------------------------------------------------------------------------------------------------------------------------------------------------------------------------------------------------------------------------------------------------------------------------------------------------------------------------------------------------------------------------------------------------------------------------------------------------------------------------------------------------------------------------------------------------------------------------------------------------------------------------------------------------------------------------------------------------------------------------------------------------------------------------------------------------------------------------------------------------------------------------------------------------------------------------------------------------------------------------------------------------------------------------------------------------------------------------------------------------------------------------------------------------------------------------------------------------------------------------------------------------------------------------------------------------------------------------------------------------------------------------------------------------------------------------------------|---|---|---|---|---|---|--|--|--|--|--|--|---|---|---|---|---|---|--|--|--|--|--|--|---|---|---|---|---|---|--|--|--|--|--|--|---|---|---|---|--|--|--|--|--|---------|----|-----|------------------------|--------------------------|--------------------------|--------------------------|-----------------|--------------------------|--------------------------|--------------------------|--------------------------------------|--------------------------|--------------------------|--------------------------|---|---|---|---|---|---|--|--|--|--|--|--|---|---|---|---|--|--|--|--|---------------------|--------------------------|---------------------|--------------------------|-------------------------------------|--------------------------|--------------------------------|--------------------------|-----------------------------------------|--------------------------|----------------------------|--------------------------|----------------------------------------------|--------------------------|------------|--------------------------|
| <b>Please use a black or blue ball-point pen. Please refer to instructions at the end of the form</b>                                                                                                                                                                                                                                                                                                                                                                                                                                                                                                                                                                                                                                                                                                                                                                                                                                                                                                                                                                                                                                                                                                                                                                                                                                                                                                                                                                                                                                                                                                                                                                                                                                                                                                                                                                                                                                                                                                                                                                                                                                                                                                                                                                                                                                                                                                                                                                                                                                                                                                                                                                                                                                                                                                                                                                                                                                                                                                                                                                                                                                                                                                                                                                                                                                                                                                                                                                                                                                                                                                                                                                                                                                                                                                                                                                                                                                                                                                                                                                                                                                                                                                                                                                                                                                                                                                                                                                                                                                                                                                                                                                                                                                                                                                                                                                                                                                                                                                                                                                                                                                                                                                                                                                                                                                                                                                                                                                                                                                                                                                                                                                     |                                                                                                                                                                                                                                                                      |                                                                                                                                           |                          |   |   |   |  |  |  |  |  |  |  |         |    |     |                                                  |                          |                          |                          |                               |                          |                          |                          |                      |                          |                          |                          |               |                          |                          |                          |            |                          |                          |                          |                       |                          |                          |                          |                      |                          |                          |                          |             |                          |                          |                          |                                      |                          |                          |                          |                            |                          |                          |                          |            |                          |                          |                          |                    |                          |                          |                          |  |         |    |     |                |                          |                          |                          |                |                          |                          |                          |               |                          |                          |                          |                  |                          |                          |                          |                                                                                                                                                                                                                                                                                                                                                                                                                                                                                                                                                                                                                                                                                                                                                                                                                                                                                                                                                                                                                                                                                                                                                                                                                                                                                                                                                                                                                                                                                                                                                                                                                                                                                                                                                                                                                                                                                                                                                                                                                                                                                                                                                                                                                                                                                                                                                                                                                                                                                                                                                                                                                                                                                                                                                                                                                                                                                                                                                                                                                                                                                                                                                                                                                                                                                                                                                                                                                                                                                                                                                                                                                                                                                                                                                                                                                                                                                                                                                                                                                                                                                                                                                                                                                                                                                                                                                                                                                                                                                                                                                                                                                                                                                                                            |   |   |   |   |   |   |  |  |  |  |  |  |   |   |   |   |   |   |  |  |  |  |  |  |   |   |   |   |   |   |  |  |  |  |  |  |   |   |   |   |  |  |  |  |  |         |    |     |                        |                          |                          |                          |                 |                          |                          |                          |                                      |                          |                          |                          |   |   |   |   |   |   |  |  |  |  |  |  |   |   |   |   |  |  |  |  |                     |                          |                     |                          |                                     |                          |                                |                          |                                         |                          |                            |                          |                                              |                          |            |                          |
| <b>Country code</b> <input style="width: 20px; height: 15px;" type="text"/> <input style="width: 20px; height: 15px;" type="text"/> <input style="width: 20px; height: 15px;" type="text"/>                                                                                                                                                                                                                                                                                                                                                                                                                                                                                                                                                                                                                                                                                                                                                                                                                                                                                                                                                                                                                                                                                                                                                                                                                                                                                                                                                                                                                                                                                                                                                                                                                                                                                                                                                                                                                                                                                                                                                                                                                                                                                                                                                                                                                                                                                                                                                                                                                                                                                                                                                                                                                                                                                                                                                                                                                                                                                                                                                                                                                                                                                                                                                                                                                                                                                                                                                                                                                                                                                                                                                                                                                                                                                                                                                                                                                                                                                                                                                                                                                                                                                                                                                                                                                                                                                                                                                                                                                                                                                                                                                                                                                                                                                                                                                                                                                                                                                                                                                                                                                                                                                                                                                                                                                                                                                                                                                                                                                                                                               | <b>Hospital ID</b> <input style="width: 20px; height: 15px;" type="text"/> <input style="width: 20px; height: 15px;" type="text"/>                                                                                                                                   | <b>Participant number</b> <input style="width: 20px; height: 15px;" type="text"/> <input style="width: 20px; height: 15px;" type="text"/> |                          |   |   |   |  |  |  |  |  |  |  |         |    |     |                                                  |                          |                          |                          |                               |                          |                          |                          |                      |                          |                          |                          |               |                          |                          |                          |            |                          |                          |                          |                       |                          |                          |                          |                      |                          |                          |                          |             |                          |                          |                          |                                      |                          |                          |                          |                            |                          |                          |                          |            |                          |                          |                          |                    |                          |                          |                          |  |         |    |     |                |                          |                          |                          |                |                          |                          |                          |               |                          |                          |                          |                  |                          |                          |                          |                                                                                                                                                                                                                                                                                                                                                                                                                                                                                                                                                                                                                                                                                                                                                                                                                                                                                                                                                                                                                                                                                                                                                                                                                                                                                                                                                                                                                                                                                                                                                                                                                                                                                                                                                                                                                                                                                                                                                                                                                                                                                                                                                                                                                                                                                                                                                                                                                                                                                                                                                                                                                                                                                                                                                                                                                                                                                                                                                                                                                                                                                                                                                                                                                                                                                                                                                                                                                                                                                                                                                                                                                                                                                                                                                                                                                                                                                                                                                                                                                                                                                                                                                                                                                                                                                                                                                                                                                                                                                                                                                                                                                                                                                                                            |   |   |   |   |   |   |  |  |  |  |  |  |   |   |   |   |   |   |  |  |  |  |  |  |   |   |   |   |   |   |  |  |  |  |  |  |   |   |   |   |  |  |  |  |  |         |    |     |                        |                          |                          |                          |                 |                          |                          |                          |                                      |                          |                          |                          |   |   |   |   |   |   |  |  |  |  |  |  |   |   |   |   |  |  |  |  |                     |                          |                     |                          |                                     |                          |                                |                          |                                         |                          |                            |                          |                                              |                          |            |                          |
| <p><b>A) CARE BEFORE ENTERING THE STUDY</b></p> <p style="text-align: right;">Unknown    No    Yes</p> <p>1) Did the woman receive antenatal care? <input type="checkbox"/> <input type="checkbox"/> <input type="checkbox"/></p> <p>1.1) If yes, total number of antenatal visits <input style="width: 20px; height: 15px;" type="text"/> <input style="width: 20px; height: 15px;" type="text"/><br/><i>(unknown=99)</i></p> <p>1.2) Date of first antenatal visit <table border="1" style="display: inline-table; border-collapse: collapse;"><tr><td>d</td><td>d</td><td>m</td><td>m</td><td>y</td><td>y</td></tr><tr><td> </td><td> </td><td> </td><td> </td><td> </td><td> </td></tr></table><br/><i>(unknown=99/99/99)</i></p> <p>2) Is there a history of any of the following in the previous 14 days before entering the study?<br/><i>(previous to date of Q15 in GLOSS form - October 2017)</i></p> <table style="width: 100%; border-collapse: collapse;"> <thead> <tr> <th></th> <th style="text-align: center;">Unknown</th> <th style="text-align: center;">No</th> <th style="text-align: center;">Yes</th> </tr> </thead> <tbody> <tr><td>a) Abdominal pain <i>(excludes contractions)</i></td><td style="text-align: center;"><input type="checkbox"/></td><td style="text-align: center;"><input type="checkbox"/></td><td style="text-align: center;"><input type="checkbox"/></td></tr> <tr><td>b) Abnormal vaginal discharge</td><td style="text-align: center;"><input type="checkbox"/></td><td style="text-align: center;"><input type="checkbox"/></td><td style="text-align: center;"><input type="checkbox"/></td></tr> <tr><td>c) Sore throat/cough</td><td style="text-align: center;"><input type="checkbox"/></td><td style="text-align: center;"><input type="checkbox"/></td><td style="text-align: center;"><input type="checkbox"/></td></tr> <tr><td>d) Chest pain</td><td style="text-align: center;"><input type="checkbox"/></td><td style="text-align: center;"><input type="checkbox"/></td><td style="text-align: center;"><input type="checkbox"/></td></tr> <tr><td>e) Dysuria</td><td style="text-align: center;"><input type="checkbox"/></td><td style="text-align: center;"><input type="checkbox"/></td><td style="text-align: center;"><input type="checkbox"/></td></tr> <tr><td>f) Vomiting/diarrhoea</td><td style="text-align: center;"><input type="checkbox"/></td><td style="text-align: center;"><input type="checkbox"/></td><td style="text-align: center;"><input type="checkbox"/></td></tr> <tr><td>g) Flu-like symptoms</td><td style="text-align: center;"><input type="checkbox"/></td><td style="text-align: center;"><input type="checkbox"/></td><td style="text-align: center;"><input type="checkbox"/></td></tr> <tr><td>h) Mastitis</td><td style="text-align: center;"><input type="checkbox"/></td><td style="text-align: center;"><input type="checkbox"/></td><td style="text-align: center;"><input type="checkbox"/></td></tr> <tr><td>i) Caesarean section wound infection</td><td style="text-align: center;"><input type="checkbox"/></td><td style="text-align: center;"><input type="checkbox"/></td><td style="text-align: center;"><input type="checkbox"/></td></tr> <tr><td>j) Urinary Tract Infection</td><td style="text-align: center;"><input type="checkbox"/></td><td style="text-align: center;"><input type="checkbox"/></td><td style="text-align: center;"><input type="checkbox"/></td></tr> <tr><td>k) Malaria</td><td style="text-align: center;"><input type="checkbox"/></td><td style="text-align: center;"><input type="checkbox"/></td><td style="text-align: center;"><input type="checkbox"/></td></tr> <tr><td>l) Other infection</td><td style="text-align: center;"><input type="checkbox"/></td><td style="text-align: center;"><input type="checkbox"/></td><td style="text-align: center;"><input type="checkbox"/></td></tr> </tbody> </table> <p>l.1) If other, specify:<br/>_____</p> <p>_____</p> <p>If No to all above, go to Q3</p> <p>2.1) If Yes, did she receive treatment for the condition(s) in the previous 14 days before entering the study?</p> <p style="text-align: right;">Unknown    No    Yes</p> <p style="text-align: center;"><input type="checkbox"/> <input type="checkbox"/> <input type="checkbox"/></p> <p>2.2) If yes, any prescription of antimicrobials in the previous 14 days before entering the study?:</p> <table style="width: 100%; border-collapse: collapse;"> <thead> <tr> <th></th> <th style="text-align: center;">Unknown</th> <th style="text-align: center;">No</th> <th style="text-align: center;">Yes</th> </tr> </thead> <tbody> <tr><td>a) Antibiotics</td><td style="text-align: center;"><input type="checkbox"/></td><td style="text-align: center;"><input type="checkbox"/></td><td style="text-align: center;"><input type="checkbox"/></td></tr> <tr><td>b) Antifungals</td><td style="text-align: center;"><input type="checkbox"/></td><td style="text-align: center;"><input type="checkbox"/></td><td style="text-align: center;"><input type="checkbox"/></td></tr> <tr><td>c) Antivirals</td><td style="text-align: center;"><input type="checkbox"/></td><td style="text-align: center;"><input type="checkbox"/></td><td style="text-align: center;"><input type="checkbox"/></td></tr> <tr><td>d) Antimalarials</td><td style="text-align: center;"><input type="checkbox"/></td><td style="text-align: center;"><input type="checkbox"/></td><td style="text-align: center;"><input type="checkbox"/></td></tr> </tbody> </table> <p>If Yes, specify:<br/>_____</p> <p>_____</p> | d                                                                                                                                                                                                                                                                    | d                                                                                                                                         | m                        | m | y | y |  |  |  |  |  |  |  | Unknown | No | Yes | a) Abdominal pain <i>(excludes contractions)</i> | <input type="checkbox"/> | <input type="checkbox"/> | <input type="checkbox"/> | b) Abnormal vaginal discharge | <input type="checkbox"/> | <input type="checkbox"/> | <input type="checkbox"/> | c) Sore throat/cough | <input type="checkbox"/> | <input type="checkbox"/> | <input type="checkbox"/> | d) Chest pain | <input type="checkbox"/> | <input type="checkbox"/> | <input type="checkbox"/> | e) Dysuria | <input type="checkbox"/> | <input type="checkbox"/> | <input type="checkbox"/> | f) Vomiting/diarrhoea | <input type="checkbox"/> | <input type="checkbox"/> | <input type="checkbox"/> | g) Flu-like symptoms | <input type="checkbox"/> | <input type="checkbox"/> | <input type="checkbox"/> | h) Mastitis | <input type="checkbox"/> | <input type="checkbox"/> | <input type="checkbox"/> | i) Caesarean section wound infection | <input type="checkbox"/> | <input type="checkbox"/> | <input type="checkbox"/> | j) Urinary Tract Infection | <input type="checkbox"/> | <input type="checkbox"/> | <input type="checkbox"/> | k) Malaria | <input type="checkbox"/> | <input type="checkbox"/> | <input type="checkbox"/> | l) Other infection | <input type="checkbox"/> | <input type="checkbox"/> | <input type="checkbox"/> |  | Unknown | No | Yes | a) Antibiotics | <input type="checkbox"/> | <input type="checkbox"/> | <input type="checkbox"/> | b) Antifungals | <input type="checkbox"/> | <input type="checkbox"/> | <input type="checkbox"/> | c) Antivirals | <input type="checkbox"/> | <input type="checkbox"/> | <input type="checkbox"/> | d) Antimalarials | <input type="checkbox"/> | <input type="checkbox"/> | <input type="checkbox"/> | <p>3) Any hospitalisation in the previous 14 days before entering the study?<br/><i>(excluding for childbirth)</i></p> <p style="text-align: right;">Unknown    No    Yes</p> <p style="text-align: center;"><input type="checkbox"/> <input type="checkbox"/> <input type="checkbox"/></p> <p>3.1) If Yes, date of last admission    Date of discharge</p> <table style="display: inline-table; border-collapse: collapse; margin-right: 20px;"> <tr><td>d</td><td>d</td><td>m</td><td>m</td><td>y</td><td>y</td></tr> <tr><td> </td><td> </td><td> </td><td> </td><td> </td><td> </td></tr> </table> <table style="display: inline-table; border-collapse: collapse;"> <tr><td>d</td><td>d</td><td>m</td><td>m</td><td>y</td><td>y</td></tr> <tr><td> </td><td> </td><td> </td><td> </td><td> </td><td> </td></tr> </table> <p><i>(unknown=99/99/99)</i></p> <p>4) Main reasons of last hospitalisation in the previous 14 days before entering the study <i>(excluding for childbirth)</i></p> <p>_____</p> <p>_____</p> <p><b>B) ENTRY IN THE STUDY</b></p> <p><b>5) Date and time of arrival at facility</b><br/><i>(or admission if arrival not recorded)</i><br/><i>(date of Q1 in GLOSS form - October 2017)</i></p> <table style="display: inline-table; border-collapse: collapse; margin-right: 20px;"> <tr><td>d</td><td>d</td><td>m</td><td>m</td><td>y</td><td>y</td></tr> <tr><td> </td><td> </td><td> </td><td> </td><td> </td><td> </td></tr> </table> <table style="display: inline-table; border-collapse: collapse;"> <tr><td>h</td><td>h</td><td>m</td><td>m</td></tr> <tr><td> </td><td> </td><td> </td><td> </td></tr> </table> <p><i>(unknown=99/99/99)</i>      <i>(00:00-23:59 hrs)</i></p> <p>6) Did the woman receive care before arriving in the facility?</p> <table style="width: 100%; border-collapse: collapse;"> <thead> <tr> <th></th> <th style="text-align: center;">Unknown</th> <th style="text-align: center;">No</th> <th style="text-align: center;">Yes</th> </tr> </thead> <tbody> <tr><td>a) At home / community</td><td style="text-align: center;"><input type="checkbox"/></td><td style="text-align: center;"><input type="checkbox"/></td><td style="text-align: center;"><input type="checkbox"/></td></tr> <tr><td>b) In ambulance</td><td style="text-align: center;"><input type="checkbox"/></td><td style="text-align: center;"><input type="checkbox"/></td><td style="text-align: center;"><input type="checkbox"/></td></tr> <tr><td>c) In other facility before referral</td><td style="text-align: center;"><input type="checkbox"/></td><td style="text-align: center;"><input type="checkbox"/></td><td style="text-align: center;"><input type="checkbox"/></td></tr> </tbody> </table> <p>7) Was she referred more than once before arriving to this facility?<br/><i>If No or unknown go to Q10</i></p> <p style="text-align: right;">Unknown    No    Yes</p> <p style="text-align: center;"><input type="checkbox"/> <input type="checkbox"/> <input type="checkbox"/></p> <p>8) Date and time of last transport before arrival at this facility</p> <table style="display: inline-table; border-collapse: collapse; margin-right: 20px;"> <tr><td>d</td><td>d</td><td>m</td><td>m</td><td>y</td><td>y</td></tr> <tr><td> </td><td> </td><td> </td><td> </td><td> </td><td> </td></tr> </table> <table style="display: inline-table; border-collapse: collapse;"> <tr><td>h</td><td>h</td><td>m</td><td>m</td></tr> <tr><td> </td><td> </td><td> </td><td> </td></tr> </table> <p><i>(unknown=99/99/99)</i>      <i>(00:00-23:59 hrs)</i></p> <p>9) What was the mode of transportation used in last referral before arriving to this facility? <i>(tick one)</i></p> <table style="width: 100%; border-collapse: collapse;"> <tbody> <tr><td>a) Public transport</td><td style="text-align: center;"><input type="checkbox"/></td></tr> <tr><td>b) Family transport</td><td style="text-align: center;"><input type="checkbox"/></td></tr> <tr><td>c) Non-medicalised formal transport</td><td style="text-align: center;"><input type="checkbox"/></td></tr> <tr><td>d) Ambulance with the facility</td><td style="text-align: center;"><input type="checkbox"/></td></tr> <tr><td>e) Ambulance called from other facility</td><td style="text-align: center;"><input type="checkbox"/></td></tr> <tr><td>f) Other ambulance service</td><td style="text-align: center;"><input type="checkbox"/></td></tr> <tr><td>g) A private or commercial transport vehicle</td><td style="text-align: center;"><input type="checkbox"/></td></tr> <tr><td>h) Unknown</td><td style="text-align: center;"><input type="checkbox"/></td></tr> </tbody> </table> | d | d | m | m | y | y |  |  |  |  |  |  | d | d | m | m | y | y |  |  |  |  |  |  | d | d | m | m | y | y |  |  |  |  |  |  | h | h | m | m |  |  |  |  |  | Unknown | No | Yes | a) At home / community | <input type="checkbox"/> | <input type="checkbox"/> | <input type="checkbox"/> | b) In ambulance | <input type="checkbox"/> | <input type="checkbox"/> | <input type="checkbox"/> | c) In other facility before referral | <input type="checkbox"/> | <input type="checkbox"/> | <input type="checkbox"/> | d | d | m | m | y | y |  |  |  |  |  |  | h | h | m | m |  |  |  |  | a) Public transport | <input type="checkbox"/> | b) Family transport | <input type="checkbox"/> | c) Non-medicalised formal transport | <input type="checkbox"/> | d) Ambulance with the facility | <input type="checkbox"/> | e) Ambulance called from other facility | <input type="checkbox"/> | f) Other ambulance service | <input type="checkbox"/> | g) A private or commercial transport vehicle | <input type="checkbox"/> | h) Unknown | <input type="checkbox"/> |
| d                                                                                                                                                                                                                                                                                                                                                                                                                                                                                                                                                                                                                                                                                                                                                                                                                                                                                                                                                                                                                                                                                                                                                                                                                                                                                                                                                                                                                                                                                                                                                                                                                                                                                                                                                                                                                                                                                                                                                                                                                                                                                                                                                                                                                                                                                                                                                                                                                                                                                                                                                                                                                                                                                                                                                                                                                                                                                                                                                                                                                                                                                                                                                                                                                                                                                                                                                                                                                                                                                                                                                                                                                                                                                                                                                                                                                                                                                                                                                                                                                                                                                                                                                                                                                                                                                                                                                                                                                                                                                                                                                                                                                                                                                                                                                                                                                                                                                                                                                                                                                                                                                                                                                                                                                                                                                                                                                                                                                                                                                                                                                                                                                                                                         | d                                                                                                                                                                                                                                                                    | m                                                                                                                                         | m                        | y | y |   |  |  |  |  |  |  |  |         |    |     |                                                  |                          |                          |                          |                               |                          |                          |                          |                      |                          |                          |                          |               |                          |                          |                          |            |                          |                          |                          |                       |                          |                          |                          |                      |                          |                          |                          |             |                          |                          |                          |                                      |                          |                          |                          |                            |                          |                          |                          |            |                          |                          |                          |                    |                          |                          |                          |  |         |    |     |                |                          |                          |                          |                |                          |                          |                          |               |                          |                          |                          |                  |                          |                          |                          |                                                                                                                                                                                                                                                                                                                                                                                                                                                                                                                                                                                                                                                                                                                                                                                                                                                                                                                                                                                                                                                                                                                                                                                                                                                                                                                                                                                                                                                                                                                                                                                                                                                                                                                                                                                                                                                                                                                                                                                                                                                                                                                                                                                                                                                                                                                                                                                                                                                                                                                                                                                                                                                                                                                                                                                                                                                                                                                                                                                                                                                                                                                                                                                                                                                                                                                                                                                                                                                                                                                                                                                                                                                                                                                                                                                                                                                                                                                                                                                                                                                                                                                                                                                                                                                                                                                                                                                                                                                                                                                                                                                                                                                                                                                            |   |   |   |   |   |   |  |  |  |  |  |  |   |   |   |   |   |   |  |  |  |  |  |  |   |   |   |   |   |   |  |  |  |  |  |  |   |   |   |   |  |  |  |  |  |         |    |     |                        |                          |                          |                          |                 |                          |                          |                          |                                      |                          |                          |                          |   |   |   |   |   |   |  |  |  |  |  |  |   |   |   |   |  |  |  |  |                     |                          |                     |                          |                                     |                          |                                |                          |                                         |                          |                            |                          |                                              |                          |            |                          |
|                                                                                                                                                                                                                                                                                                                                                                                                                                                                                                                                                                                                                                                                                                                                                                                                                                                                                                                                                                                                                                                                                                                                                                                                                                                                                                                                                                                                                                                                                                                                                                                                                                                                                                                                                                                                                                                                                                                                                                                                                                                                                                                                                                                                                                                                                                                                                                                                                                                                                                                                                                                                                                                                                                                                                                                                                                                                                                                                                                                                                                                                                                                                                                                                                                                                                                                                                                                                                                                                                                                                                                                                                                                                                                                                                                                                                                                                                                                                                                                                                                                                                                                                                                                                                                                                                                                                                                                                                                                                                                                                                                                                                                                                                                                                                                                                                                                                                                                                                                                                                                                                                                                                                                                                                                                                                                                                                                                                                                                                                                                                                                                                                                                                           |                                                                                                                                                                                                                                                                      |                                                                                                                                           |                          |   |   |   |  |  |  |  |  |  |  |         |    |     |                                                  |                          |                          |                          |                               |                          |                          |                          |                      |                          |                          |                          |               |                          |                          |                          |            |                          |                          |                          |                       |                          |                          |                          |                      |                          |                          |                          |             |                          |                          |                          |                                      |                          |                          |                          |                            |                          |                          |                          |            |                          |                          |                          |                    |                          |                          |                          |  |         |    |     |                |                          |                          |                          |                |                          |                          |                          |               |                          |                          |                          |                  |                          |                          |                          |                                                                                                                                                                                                                                                                                                                                                                                                                                                                                                                                                                                                                                                                                                                                                                                                                                                                                                                                                                                                                                                                                                                                                                                                                                                                                                                                                                                                                                                                                                                                                                                                                                                                                                                                                                                                                                                                                                                                                                                                                                                                                                                                                                                                                                                                                                                                                                                                                                                                                                                                                                                                                                                                                                                                                                                                                                                                                                                                                                                                                                                                                                                                                                                                                                                                                                                                                                                                                                                                                                                                                                                                                                                                                                                                                                                                                                                                                                                                                                                                                                                                                                                                                                                                                                                                                                                                                                                                                                                                                                                                                                                                                                                                                                                            |   |   |   |   |   |   |  |  |  |  |  |  |   |   |   |   |   |   |  |  |  |  |  |  |   |   |   |   |   |   |  |  |  |  |  |  |   |   |   |   |  |  |  |  |  |         |    |     |                        |                          |                          |                          |                 |                          |                          |                          |                                      |                          |                          |                          |   |   |   |   |   |   |  |  |  |  |  |  |   |   |   |   |  |  |  |  |                     |                          |                     |                          |                                     |                          |                                |                          |                                         |                          |                            |                          |                                              |                          |            |                          |
|                                                                                                                                                                                                                                                                                                                                                                                                                                                                                                                                                                                                                                                                                                                                                                                                                                                                                                                                                                                                                                                                                                                                                                                                                                                                                                                                                                                                                                                                                                                                                                                                                                                                                                                                                                                                                                                                                                                                                                                                                                                                                                                                                                                                                                                                                                                                                                                                                                                                                                                                                                                                                                                                                                                                                                                                                                                                                                                                                                                                                                                                                                                                                                                                                                                                                                                                                                                                                                                                                                                                                                                                                                                                                                                                                                                                                                                                                                                                                                                                                                                                                                                                                                                                                                                                                                                                                                                                                                                                                                                                                                                                                                                                                                                                                                                                                                                                                                                                                                                                                                                                                                                                                                                                                                                                                                                                                                                                                                                                                                                                                                                                                                                                           | Unknown                                                                                                                                                                                                                                                              | No                                                                                                                                        | Yes                      |   |   |   |  |  |  |  |  |  |  |         |    |     |                                                  |                          |                          |                          |                               |                          |                          |                          |                      |                          |                          |                          |               |                          |                          |                          |            |                          |                          |                          |                       |                          |                          |                          |                      |                          |                          |                          |             |                          |                          |                          |                                      |                          |                          |                          |                            |                          |                          |                          |            |                          |                          |                          |                    |                          |                          |                          |  |         |    |     |                |                          |                          |                          |                |                          |                          |                          |               |                          |                          |                          |                  |                          |                          |                          |                                                                                                                                                                                                                                                                                                                                                                                                                                                                                                                                                                                                                                                                                                                                                                                                                                                                                                                                                                                                                                                                                                                                                                                                                                                                                                                                                                                                                                                                                                                                                                                                                                                                                                                                                                                                                                                                                                                                                                                                                                                                                                                                                                                                                                                                                                                                                                                                                                                                                                                                                                                                                                                                                                                                                                                                                                                                                                                                                                                                                                                                                                                                                                                                                                                                                                                                                                                                                                                                                                                                                                                                                                                                                                                                                                                                                                                                                                                                                                                                                                                                                                                                                                                                                                                                                                                                                                                                                                                                                                                                                                                                                                                                                                                            |   |   |   |   |   |   |  |  |  |  |  |  |   |   |   |   |   |   |  |  |  |  |  |  |   |   |   |   |   |   |  |  |  |  |  |  |   |   |   |   |  |  |  |  |  |         |    |     |                        |                          |                          |                          |                 |                          |                          |                          |                                      |                          |                          |                          |   |   |   |   |   |   |  |  |  |  |  |  |   |   |   |   |  |  |  |  |                     |                          |                     |                          |                                     |                          |                                |                          |                                         |                          |                            |                          |                                              |                          |            |                          |
| a) Abdominal pain <i>(excludes contractions)</i>                                                                                                                                                                                                                                                                                                                                                                                                                                                                                                                                                                                                                                                                                                                                                                                                                                                                                                                                                                                                                                                                                                                                                                                                                                                                                                                                                                                                                                                                                                                                                                                                                                                                                                                                                                                                                                                                                                                                                                                                                                                                                                                                                                                                                                                                                                                                                                                                                                                                                                                                                                                                                                                                                                                                                                                                                                                                                                                                                                                                                                                                                                                                                                                                                                                                                                                                                                                                                                                                                                                                                                                                                                                                                                                                                                                                                                                                                                                                                                                                                                                                                                                                                                                                                                                                                                                                                                                                                                                                                                                                                                                                                                                                                                                                                                                                                                                                                                                                                                                                                                                                                                                                                                                                                                                                                                                                                                                                                                                                                                                                                                                                                          | <input type="checkbox"/>                                                                                                                                                                                                                                             | <input type="checkbox"/>                                                                                                                  | <input type="checkbox"/> |   |   |   |  |  |  |  |  |  |  |         |    |     |                                                  |                          |                          |                          |                               |                          |                          |                          |                      |                          |                          |                          |               |                          |                          |                          |            |                          |                          |                          |                       |                          |                          |                          |                      |                          |                          |                          |             |                          |                          |                          |                                      |                          |                          |                          |                            |                          |                          |                          |            |                          |                          |                          |                    |                          |                          |                          |  |         |    |     |                |                          |                          |                          |                |                          |                          |                          |               |                          |                          |                          |                  |                          |                          |                          |                                                                                                                                                                                                                                                                                                                                                                                                                                                                                                                                                                                                                                                                                                                                                                                                                                                                                                                                                                                                                                                                                                                                                                                                                                                                                                                                                                                                                                                                                                                                                                                                                                                                                                                                                                                                                                                                                                                                                                                                                                                                                                                                                                                                                                                                                                                                                                                                                                                                                                                                                                                                                                                                                                                                                                                                                                                                                                                                                                                                                                                                                                                                                                                                                                                                                                                                                                                                                                                                                                                                                                                                                                                                                                                                                                                                                                                                                                                                                                                                                                                                                                                                                                                                                                                                                                                                                                                                                                                                                                                                                                                                                                                                                                                            |   |   |   |   |   |   |  |  |  |  |  |  |   |   |   |   |   |   |  |  |  |  |  |  |   |   |   |   |   |   |  |  |  |  |  |  |   |   |   |   |  |  |  |  |  |         |    |     |                        |                          |                          |                          |                 |                          |                          |                          |                                      |                          |                          |                          |   |   |   |   |   |   |  |  |  |  |  |  |   |   |   |   |  |  |  |  |                     |                          |                     |                          |                                     |                          |                                |                          |                                         |                          |                            |                          |                                              |                          |            |                          |
| b) Abnormal vaginal discharge                                                                                                                                                                                                                                                                                                                                                                                                                                                                                                                                                                                                                                                                                                                                                                                                                                                                                                                                                                                                                                                                                                                                                                                                                                                                                                                                                                                                                                                                                                                                                                                                                                                                                                                                                                                                                                                                                                                                                                                                                                                                                                                                                                                                                                                                                                                                                                                                                                                                                                                                                                                                                                                                                                                                                                                                                                                                                                                                                                                                                                                                                                                                                                                                                                                                                                                                                                                                                                                                                                                                                                                                                                                                                                                                                                                                                                                                                                                                                                                                                                                                                                                                                                                                                                                                                                                                                                                                                                                                                                                                                                                                                                                                                                                                                                                                                                                                                                                                                                                                                                                                                                                                                                                                                                                                                                                                                                                                                                                                                                                                                                                                                                             | <input type="checkbox"/>                                                                                                                                                                                                                                             | <input type="checkbox"/>                                                                                                                  | <input type="checkbox"/> |   |   |   |  |  |  |  |  |  |  |         |    |     |                                                  |                          |                          |                          |                               |                          |                          |                          |                      |                          |                          |                          |               |                          |                          |                          |            |                          |                          |                          |                       |                          |                          |                          |                      |                          |                          |                          |             |                          |                          |                          |                                      |                          |                          |                          |                            |                          |                          |                          |            |                          |                          |                          |                    |                          |                          |                          |  |         |    |     |                |                          |                          |                          |                |                          |                          |                          |               |                          |                          |                          |                  |                          |                          |                          |                                                                                                                                                                                                                                                                                                                                                                                                                                                                                                                                                                                                                                                                                                                                                                                                                                                                                                                                                                                                                                                                                                                                                                                                                                                                                                                                                                                                                                                                                                                                                                                                                                                                                                                                                                                                                                                                                                                                                                                                                                                                                                                                                                                                                                                                                                                                                                                                                                                                                                                                                                                                                                                                                                                                                                                                                                                                                                                                                                                                                                                                                                                                                                                                                                                                                                                                                                                                                                                                                                                                                                                                                                                                                                                                                                                                                                                                                                                                                                                                                                                                                                                                                                                                                                                                                                                                                                                                                                                                                                                                                                                                                                                                                                                            |   |   |   |   |   |   |  |  |  |  |  |  |   |   |   |   |   |   |  |  |  |  |  |  |   |   |   |   |   |   |  |  |  |  |  |  |   |   |   |   |  |  |  |  |  |         |    |     |                        |                          |                          |                          |                 |                          |                          |                          |                                      |                          |                          |                          |   |   |   |   |   |   |  |  |  |  |  |  |   |   |   |   |  |  |  |  |                     |                          |                     |                          |                                     |                          |                                |                          |                                         |                          |                            |                          |                                              |                          |            |                          |
| c) Sore throat/cough                                                                                                                                                                                                                                                                                                                                                                                                                                                                                                                                                                                                                                                                                                                                                                                                                                                                                                                                                                                                                                                                                                                                                                                                                                                                                                                                                                                                                                                                                                                                                                                                                                                                                                                                                                                                                                                                                                                                                                                                                                                                                                                                                                                                                                                                                                                                                                                                                                                                                                                                                                                                                                                                                                                                                                                                                                                                                                                                                                                                                                                                                                                                                                                                                                                                                                                                                                                                                                                                                                                                                                                                                                                                                                                                                                                                                                                                                                                                                                                                                                                                                                                                                                                                                                                                                                                                                                                                                                                                                                                                                                                                                                                                                                                                                                                                                                                                                                                                                                                                                                                                                                                                                                                                                                                                                                                                                                                                                                                                                                                                                                                                                                                      | <input type="checkbox"/>                                                                                                                                                                                                                                             | <input type="checkbox"/>                                                                                                                  | <input type="checkbox"/> |   |   |   |  |  |  |  |  |  |  |         |    |     |                                                  |                          |                          |                          |                               |                          |                          |                          |                      |                          |                          |                          |               |                          |                          |                          |            |                          |                          |                          |                       |                          |                          |                          |                      |                          |                          |                          |             |                          |                          |                          |                                      |                          |                          |                          |                            |                          |                          |                          |            |                          |                          |                          |                    |                          |                          |                          |  |         |    |     |                |                          |                          |                          |                |                          |                          |                          |               |                          |                          |                          |                  |                          |                          |                          |                                                                                                                                                                                                                                                                                                                                                                                                                                                                                                                                                                                                                                                                                                                                                                                                                                                                                                                                                                                                                                                                                                                                                                                                                                                                                                                                                                                                                                                                                                                                                                                                                                                                                                                                                                                                                                                                                                                                                                                                                                                                                                                                                                                                                                                                                                                                                                                                                                                                                                                                                                                                                                                                                                                                                                                                                                                                                                                                                                                                                                                                                                                                                                                                                                                                                                                                                                                                                                                                                                                                                                                                                                                                                                                                                                                                                                                                                                                                                                                                                                                                                                                                                                                                                                                                                                                                                                                                                                                                                                                                                                                                                                                                                                                            |   |   |   |   |   |   |  |  |  |  |  |  |   |   |   |   |   |   |  |  |  |  |  |  |   |   |   |   |   |   |  |  |  |  |  |  |   |   |   |   |  |  |  |  |  |         |    |     |                        |                          |                          |                          |                 |                          |                          |                          |                                      |                          |                          |                          |   |   |   |   |   |   |  |  |  |  |  |  |   |   |   |   |  |  |  |  |                     |                          |                     |                          |                                     |                          |                                |                          |                                         |                          |                            |                          |                                              |                          |            |                          |
| d) Chest pain                                                                                                                                                                                                                                                                                                                                                                                                                                                                                                                                                                                                                                                                                                                                                                                                                                                                                                                                                                                                                                                                                                                                                                                                                                                                                                                                                                                                                                                                                                                                                                                                                                                                                                                                                                                                                                                                                                                                                                                                                                                                                                                                                                                                                                                                                                                                                                                                                                                                                                                                                                                                                                                                                                                                                                                                                                                                                                                                                                                                                                                                                                                                                                                                                                                                                                                                                                                                                                                                                                                                                                                                                                                                                                                                                                                                                                                                                                                                                                                                                                                                                                                                                                                                                                                                                                                                                                                                                                                                                                                                                                                                                                                                                                                                                                                                                                                                                                                                                                                                                                                                                                                                                                                                                                                                                                                                                                                                                                                                                                                                                                                                                                                             | <input type="checkbox"/>                                                                                                                                                                                                                                             | <input type="checkbox"/>                                                                                                                  | <input type="checkbox"/> |   |   |   |  |  |  |  |  |  |  |         |    |     |                                                  |                          |                          |                          |                               |                          |                          |                          |                      |                          |                          |                          |               |                          |                          |                          |            |                          |                          |                          |                       |                          |                          |                          |                      |                          |                          |                          |             |                          |                          |                          |                                      |                          |                          |                          |                            |                          |                          |                          |            |                          |                          |                          |                    |                          |                          |                          |  |         |    |     |                |                          |                          |                          |                |                          |                          |                          |               |                          |                          |                          |                  |                          |                          |                          |                                                                                                                                                                                                                                                                                                                                                                                                                                                                                                                                                                                                                                                                                                                                                                                                                                                                                                                                                                                                                                                                                                                                                                                                                                                                                                                                                                                                                                                                                                                                                                                                                                                                                                                                                                                                                                                                                                                                                                                                                                                                                                                                                                                                                                                                                                                                                                                                                                                                                                                                                                                                                                                                                                                                                                                                                                                                                                                                                                                                                                                                                                                                                                                                                                                                                                                                                                                                                                                                                                                                                                                                                                                                                                                                                                                                                                                                                                                                                                                                                                                                                                                                                                                                                                                                                                                                                                                                                                                                                                                                                                                                                                                                                                                            |   |   |   |   |   |   |  |  |  |  |  |  |   |   |   |   |   |   |  |  |  |  |  |  |   |   |   |   |   |   |  |  |  |  |  |  |   |   |   |   |  |  |  |  |  |         |    |     |                        |                          |                          |                          |                 |                          |                          |                          |                                      |                          |                          |                          |   |   |   |   |   |   |  |  |  |  |  |  |   |   |   |   |  |  |  |  |                     |                          |                     |                          |                                     |                          |                                |                          |                                         |                          |                            |                          |                                              |                          |            |                          |
| e) Dysuria                                                                                                                                                                                                                                                                                                                                                                                                                                                                                                                                                                                                                                                                                                                                                                                                                                                                                                                                                                                                                                                                                                                                                                                                                                                                                                                                                                                                                                                                                                                                                                                                                                                                                                                                                                                                                                                                                                                                                                                                                                                                                                                                                                                                                                                                                                                                                                                                                                                                                                                                                                                                                                                                                                                                                                                                                                                                                                                                                                                                                                                                                                                                                                                                                                                                                                                                                                                                                                                                                                                                                                                                                                                                                                                                                                                                                                                                                                                                                                                                                                                                                                                                                                                                                                                                                                                                                                                                                                                                                                                                                                                                                                                                                                                                                                                                                                                                                                                                                                                                                                                                                                                                                                                                                                                                                                                                                                                                                                                                                                                                                                                                                                                                | <input type="checkbox"/>                                                                                                                                                                                                                                             | <input type="checkbox"/>                                                                                                                  | <input type="checkbox"/> |   |   |   |  |  |  |  |  |  |  |         |    |     |                                                  |                          |                          |                          |                               |                          |                          |                          |                      |                          |                          |                          |               |                          |                          |                          |            |                          |                          |                          |                       |                          |                          |                          |                      |                          |                          |                          |             |                          |                          |                          |                                      |                          |                          |                          |                            |                          |                          |                          |            |                          |                          |                          |                    |                          |                          |                          |  |         |    |     |                |                          |                          |                          |                |                          |                          |                          |               |                          |                          |                          |                  |                          |                          |                          |                                                                                                                                                                                                                                                                                                                                                                                                                                                                                                                                                                                                                                                                                                                                                                                                                                                                                                                                                                                                                                                                                                                                                                                                                                                                                                                                                                                                                                                                                                                                                                                                                                                                                                                                                                                                                                                                                                                                                                                                                                                                                                                                                                                                                                                                                                                                                                                                                                                                                                                                                                                                                                                                                                                                                                                                                                                                                                                                                                                                                                                                                                                                                                                                                                                                                                                                                                                                                                                                                                                                                                                                                                                                                                                                                                                                                                                                                                                                                                                                                                                                                                                                                                                                                                                                                                                                                                                                                                                                                                                                                                                                                                                                                                                            |   |   |   |   |   |   |  |  |  |  |  |  |   |   |   |   |   |   |  |  |  |  |  |  |   |   |   |   |   |   |  |  |  |  |  |  |   |   |   |   |  |  |  |  |  |         |    |     |                        |                          |                          |                          |                 |                          |                          |                          |                                      |                          |                          |                          |   |   |   |   |   |   |  |  |  |  |  |  |   |   |   |   |  |  |  |  |                     |                          |                     |                          |                                     |                          |                                |                          |                                         |                          |                            |                          |                                              |                          |            |                          |
| f) Vomiting/diarrhoea                                                                                                                                                                                                                                                                                                                                                                                                                                                                                                                                                                                                                                                                                                                                                                                                                                                                                                                                                                                                                                                                                                                                                                                                                                                                                                                                                                                                                                                                                                                                                                                                                                                                                                                                                                                                                                                                                                                                                                                                                                                                                                                                                                                                                                                                                                                                                                                                                                                                                                                                                                                                                                                                                                                                                                                                                                                                                                                                                                                                                                                                                                                                                                                                                                                                                                                                                                                                                                                                                                                                                                                                                                                                                                                                                                                                                                                                                                                                                                                                                                                                                                                                                                                                                                                                                                                                                                                                                                                                                                                                                                                                                                                                                                                                                                                                                                                                                                                                                                                                                                                                                                                                                                                                                                                                                                                                                                                                                                                                                                                                                                                                                                                     | <input type="checkbox"/>                                                                                                                                                                                                                                             | <input type="checkbox"/>                                                                                                                  | <input type="checkbox"/> |   |   |   |  |  |  |  |  |  |  |         |    |     |                                                  |                          |                          |                          |                               |                          |                          |                          |                      |                          |                          |                          |               |                          |                          |                          |            |                          |                          |                          |                       |                          |                          |                          |                      |                          |                          |                          |             |                          |                          |                          |                                      |                          |                          |                          |                            |                          |                          |                          |            |                          |                          |                          |                    |                          |                          |                          |  |         |    |     |                |                          |                          |                          |                |                          |                          |                          |               |                          |                          |                          |                  |                          |                          |                          |                                                                                                                                                                                                                                                                                                                                                                                                                                                                                                                                                                                                                                                                                                                                                                                                                                                                                                                                                                                                                                                                                                                                                                                                                                                                                                                                                                                                                                                                                                                                                                                                                                                                                                                                                                                                                                                                                                                                                                                                                                                                                                                                                                                                                                                                                                                                                                                                                                                                                                                                                                                                                                                                                                                                                                                                                                                                                                                                                                                                                                                                                                                                                                                                                                                                                                                                                                                                                                                                                                                                                                                                                                                                                                                                                                                                                                                                                                                                                                                                                                                                                                                                                                                                                                                                                                                                                                                                                                                                                                                                                                                                                                                                                                                            |   |   |   |   |   |   |  |  |  |  |  |  |   |   |   |   |   |   |  |  |  |  |  |  |   |   |   |   |   |   |  |  |  |  |  |  |   |   |   |   |  |  |  |  |  |         |    |     |                        |                          |                          |                          |                 |                          |                          |                          |                                      |                          |                          |                          |   |   |   |   |   |   |  |  |  |  |  |  |   |   |   |   |  |  |  |  |                     |                          |                     |                          |                                     |                          |                                |                          |                                         |                          |                            |                          |                                              |                          |            |                          |
| g) Flu-like symptoms                                                                                                                                                                                                                                                                                                                                                                                                                                                                                                                                                                                                                                                                                                                                                                                                                                                                                                                                                                                                                                                                                                                                                                                                                                                                                                                                                                                                                                                                                                                                                                                                                                                                                                                                                                                                                                                                                                                                                                                                                                                                                                                                                                                                                                                                                                                                                                                                                                                                                                                                                                                                                                                                                                                                                                                                                                                                                                                                                                                                                                                                                                                                                                                                                                                                                                                                                                                                                                                                                                                                                                                                                                                                                                                                                                                                                                                                                                                                                                                                                                                                                                                                                                                                                                                                                                                                                                                                                                                                                                                                                                                                                                                                                                                                                                                                                                                                                                                                                                                                                                                                                                                                                                                                                                                                                                                                                                                                                                                                                                                                                                                                                                                      | <input type="checkbox"/>                                                                                                                                                                                                                                             | <input type="checkbox"/>                                                                                                                  | <input type="checkbox"/> |   |   |   |  |  |  |  |  |  |  |         |    |     |                                                  |                          |                          |                          |                               |                          |                          |                          |                      |                          |                          |                          |               |                          |                          |                          |            |                          |                          |                          |                       |                          |                          |                          |                      |                          |                          |                          |             |                          |                          |                          |                                      |                          |                          |                          |                            |                          |                          |                          |            |                          |                          |                          |                    |                          |                          |                          |  |         |    |     |                |                          |                          |                          |                |                          |                          |                          |               |                          |                          |                          |                  |                          |                          |                          |                                                                                                                                                                                                                                                                                                                                                                                                                                                                                                                                                                                                                                                                                                                                                                                                                                                                                                                                                                                                                                                                                                                                                                                                                                                                                                                                                                                                                                                                                                                                                                                                                                                                                                                                                                                                                                                                                                                                                                                                                                                                                                                                                                                                                                                                                                                                                                                                                                                                                                                                                                                                                                                                                                                                                                                                                                                                                                                                                                                                                                                                                                                                                                                                                                                                                                                                                                                                                                                                                                                                                                                                                                                                                                                                                                                                                                                                                                                                                                                                                                                                                                                                                                                                                                                                                                                                                                                                                                                                                                                                                                                                                                                                                                                            |   |   |   |   |   |   |  |  |  |  |  |  |   |   |   |   |   |   |  |  |  |  |  |  |   |   |   |   |   |   |  |  |  |  |  |  |   |   |   |   |  |  |  |  |  |         |    |     |                        |                          |                          |                          |                 |                          |                          |                          |                                      |                          |                          |                          |   |   |   |   |   |   |  |  |  |  |  |  |   |   |   |   |  |  |  |  |                     |                          |                     |                          |                                     |                          |                                |                          |                                         |                          |                            |                          |                                              |                          |            |                          |
| h) Mastitis                                                                                                                                                                                                                                                                                                                                                                                                                                                                                                                                                                                                                                                                                                                                                                                                                                                                                                                                                                                                                                                                                                                                                                                                                                                                                                                                                                                                                                                                                                                                                                                                                                                                                                                                                                                                                                                                                                                                                                                                                                                                                                                                                                                                                                                                                                                                                                                                                                                                                                                                                                                                                                                                                                                                                                                                                                                                                                                                                                                                                                                                                                                                                                                                                                                                                                                                                                                                                                                                                                                                                                                                                                                                                                                                                                                                                                                                                                                                                                                                                                                                                                                                                                                                                                                                                                                                                                                                                                                                                                                                                                                                                                                                                                                                                                                                                                                                                                                                                                                                                                                                                                                                                                                                                                                                                                                                                                                                                                                                                                                                                                                                                                                               | <input type="checkbox"/>                                                                                                                                                                                                                                             | <input type="checkbox"/>                                                                                                                  | <input type="checkbox"/> |   |   |   |  |  |  |  |  |  |  |         |    |     |                                                  |                          |                          |                          |                               |                          |                          |                          |                      |                          |                          |                          |               |                          |                          |                          |            |                          |                          |                          |                       |                          |                          |                          |                      |                          |                          |                          |             |                          |                          |                          |                                      |                          |                          |                          |                            |                          |                          |                          |            |                          |                          |                          |                    |                          |                          |                          |  |         |    |     |                |                          |                          |                          |                |                          |                          |                          |               |                          |                          |                          |                  |                          |                          |                          |                                                                                                                                                                                                                                                                                                                                                                                                                                                                                                                                                                                                                                                                                                                                                                                                                                                                                                                                                                                                                                                                                                                                                                                                                                                                                                                                                                                                                                                                                                                                                                                                                                                                                                                                                                                                                                                                                                                                                                                                                                                                                                                                                                                                                                                                                                                                                                                                                                                                                                                                                                                                                                                                                                                                                                                                                                                                                                                                                                                                                                                                                                                                                                                                                                                                                                                                                                                                                                                                                                                                                                                                                                                                                                                                                                                                                                                                                                                                                                                                                                                                                                                                                                                                                                                                                                                                                                                                                                                                                                                                                                                                                                                                                                                            |   |   |   |   |   |   |  |  |  |  |  |  |   |   |   |   |   |   |  |  |  |  |  |  |   |   |   |   |   |   |  |  |  |  |  |  |   |   |   |   |  |  |  |  |  |         |    |     |                        |                          |                          |                          |                 |                          |                          |                          |                                      |                          |                          |                          |   |   |   |   |   |   |  |  |  |  |  |  |   |   |   |   |  |  |  |  |                     |                          |                     |                          |                                     |                          |                                |                          |                                         |                          |                            |                          |                                              |                          |            |                          |
| i) Caesarean section wound infection                                                                                                                                                                                                                                                                                                                                                                                                                                                                                                                                                                                                                                                                                                                                                                                                                                                                                                                                                                                                                                                                                                                                                                                                                                                                                                                                                                                                                                                                                                                                                                                                                                                                                                                                                                                                                                                                                                                                                                                                                                                                                                                                                                                                                                                                                                                                                                                                                                                                                                                                                                                                                                                                                                                                                                                                                                                                                                                                                                                                                                                                                                                                                                                                                                                                                                                                                                                                                                                                                                                                                                                                                                                                                                                                                                                                                                                                                                                                                                                                                                                                                                                                                                                                                                                                                                                                                                                                                                                                                                                                                                                                                                                                                                                                                                                                                                                                                                                                                                                                                                                                                                                                                                                                                                                                                                                                                                                                                                                                                                                                                                                                                                      | <input type="checkbox"/>                                                                                                                                                                                                                                             | <input type="checkbox"/>                                                                                                                  | <input type="checkbox"/> |   |   |   |  |  |  |  |  |  |  |         |    |     |                                                  |                          |                          |                          |                               |                          |                          |                          |                      |                          |                          |                          |               |                          |                          |                          |            |                          |                          |                          |                       |                          |                          |                          |                      |                          |                          |                          |             |                          |                          |                          |                                      |                          |                          |                          |                            |                          |                          |                          |            |                          |                          |                          |                    |                          |                          |                          |  |         |    |     |                |                          |                          |                          |                |                          |                          |                          |               |                          |                          |                          |                  |                          |                          |                          |                                                                                                                                                                                                                                                                                                                                                                                                                                                                                                                                                                                                                                                                                                                                                                                                                                                                                                                                                                                                                                                                                                                                                                                                                                                                                                                                                                                                                                                                                                                                                                                                                                                                                                                                                                                                                                                                                                                                                                                                                                                                                                                                                                                                                                                                                                                                                                                                                                                                                                                                                                                                                                                                                                                                                                                                                                                                                                                                                                                                                                                                                                                                                                                                                                                                                                                                                                                                                                                                                                                                                                                                                                                                                                                                                                                                                                                                                                                                                                                                                                                                                                                                                                                                                                                                                                                                                                                                                                                                                                                                                                                                                                                                                                                            |   |   |   |   |   |   |  |  |  |  |  |  |   |   |   |   |   |   |  |  |  |  |  |  |   |   |   |   |   |   |  |  |  |  |  |  |   |   |   |   |  |  |  |  |  |         |    |     |                        |                          |                          |                          |                 |                          |                          |                          |                                      |                          |                          |                          |   |   |   |   |   |   |  |  |  |  |  |  |   |   |   |   |  |  |  |  |                     |                          |                     |                          |                                     |                          |                                |                          |                                         |                          |                            |                          |                                              |                          |            |                          |
| j) Urinary Tract Infection                                                                                                                                                                                                                                                                                                                                                                                                                                                                                                                                                                                                                                                                                                                                                                                                                                                                                                                                                                                                                                                                                                                                                                                                                                                                                                                                                                                                                                                                                                                                                                                                                                                                                                                                                                                                                                                                                                                                                                                                                                                                                                                                                                                                                                                                                                                                                                                                                                                                                                                                                                                                                                                                                                                                                                                                                                                                                                                                                                                                                                                                                                                                                                                                                                                                                                                                                                                                                                                                                                                                                                                                                                                                                                                                                                                                                                                                                                                                                                                                                                                                                                                                                                                                                                                                                                                                                                                                                                                                                                                                                                                                                                                                                                                                                                                                                                                                                                                                                                                                                                                                                                                                                                                                                                                                                                                                                                                                                                                                                                                                                                                                                                                | <input type="checkbox"/>                                                                                                                                                                                                                                             | <input type="checkbox"/>                                                                                                                  | <input type="checkbox"/> |   |   |   |  |  |  |  |  |  |  |         |    |     |                                                  |                          |                          |                          |                               |                          |                          |                          |                      |                          |                          |                          |               |                          |                          |                          |            |                          |                          |                          |                       |                          |                          |                          |                      |                          |                          |                          |             |                          |                          |                          |                                      |                          |                          |                          |                            |                          |                          |                          |            |                          |                          |                          |                    |                          |                          |                          |  |         |    |     |                |                          |                          |                          |                |                          |                          |                          |               |                          |                          |                          |                  |                          |                          |                          |                                                                                                                                                                                                                                                                                                                                                                                                                                                                                                                                                                                                                                                                                                                                                                                                                                                                                                                                                                                                                                                                                                                                                                                                                                                                                                                                                                                                                                                                                                                                                                                                                                                                                                                                                                                                                                                                                                                                                                                                                                                                                                                                                                                                                                                                                                                                                                                                                                                                                                                                                                                                                                                                                                                                                                                                                                                                                                                                                                                                                                                                                                                                                                                                                                                                                                                                                                                                                                                                                                                                                                                                                                                                                                                                                                                                                                                                                                                                                                                                                                                                                                                                                                                                                                                                                                                                                                                                                                                                                                                                                                                                                                                                                                                            |   |   |   |   |   |   |  |  |  |  |  |  |   |   |   |   |   |   |  |  |  |  |  |  |   |   |   |   |   |   |  |  |  |  |  |  |   |   |   |   |  |  |  |  |  |         |    |     |                        |                          |                          |                          |                 |                          |                          |                          |                                      |                          |                          |                          |   |   |   |   |   |   |  |  |  |  |  |  |   |   |   |   |  |  |  |  |                     |                          |                     |                          |                                     |                          |                                |                          |                                         |                          |                            |                          |                                              |                          |            |                          |
| k) Malaria                                                                                                                                                                                                                                                                                                                                                                                                                                                                                                                                                                                                                                                                                                                                                                                                                                                                                                                                                                                                                                                                                                                                                                                                                                                                                                                                                                                                                                                                                                                                                                                                                                                                                                                                                                                                                                                                                                                                                                                                                                                                                                                                                                                                                                                                                                                                                                                                                                                                                                                                                                                                                                                                                                                                                                                                                                                                                                                                                                                                                                                                                                                                                                                                                                                                                                                                                                                                                                                                                                                                                                                                                                                                                                                                                                                                                                                                                                                                                                                                                                                                                                                                                                                                                                                                                                                                                                                                                                                                                                                                                                                                                                                                                                                                                                                                                                                                                                                                                                                                                                                                                                                                                                                                                                                                                                                                                                                                                                                                                                                                                                                                                                                                | <input type="checkbox"/>                                                                                                                                                                                                                                             | <input type="checkbox"/>                                                                                                                  | <input type="checkbox"/> |   |   |   |  |  |  |  |  |  |  |         |    |     |                                                  |                          |                          |                          |                               |                          |                          |                          |                      |                          |                          |                          |               |                          |                          |                          |            |                          |                          |                          |                       |                          |                          |                          |                      |                          |                          |                          |             |                          |                          |                          |                                      |                          |                          |                          |                            |                          |                          |                          |            |                          |                          |                          |                    |                          |                          |                          |  |         |    |     |                |                          |                          |                          |                |                          |                          |                          |               |                          |                          |                          |                  |                          |                          |                          |                                                                                                                                                                                                                                                                                                                                                                                                                                                                                                                                                                                                                                                                                                                                                                                                                                                                                                                                                                                                                                                                                                                                                                                                                                                                                                                                                                                                                                                                                                                                                                                                                                                                                                                                                                                                                                                                                                                                                                                                                                                                                                                                                                                                                                                                                                                                                                                                                                                                                                                                                                                                                                                                                                                                                                                                                                                                                                                                                                                                                                                                                                                                                                                                                                                                                                                                                                                                                                                                                                                                                                                                                                                                                                                                                                                                                                                                                                                                                                                                                                                                                                                                                                                                                                                                                                                                                                                                                                                                                                                                                                                                                                                                                                                            |   |   |   |   |   |   |  |  |  |  |  |  |   |   |   |   |   |   |  |  |  |  |  |  |   |   |   |   |   |   |  |  |  |  |  |  |   |   |   |   |  |  |  |  |  |         |    |     |                        |                          |                          |                          |                 |                          |                          |                          |                                      |                          |                          |                          |   |   |   |   |   |   |  |  |  |  |  |  |   |   |   |   |  |  |  |  |                     |                          |                     |                          |                                     |                          |                                |                          |                                         |                          |                            |                          |                                              |                          |            |                          |
| l) Other infection                                                                                                                                                                                                                                                                                                                                                                                                                                                                                                                                                                                                                                                                                                                                                                                                                                                                                                                                                                                                                                                                                                                                                                                                                                                                                                                                                                                                                                                                                                                                                                                                                                                                                                                                                                                                                                                                                                                                                                                                                                                                                                                                                                                                                                                                                                                                                                                                                                                                                                                                                                                                                                                                                                                                                                                                                                                                                                                                                                                                                                                                                                                                                                                                                                                                                                                                                                                                                                                                                                                                                                                                                                                                                                                                                                                                                                                                                                                                                                                                                                                                                                                                                                                                                                                                                                                                                                                                                                                                                                                                                                                                                                                                                                                                                                                                                                                                                                                                                                                                                                                                                                                                                                                                                                                                                                                                                                                                                                                                                                                                                                                                                                                        | <input type="checkbox"/>                                                                                                                                                                                                                                             | <input type="checkbox"/>                                                                                                                  | <input type="checkbox"/> |   |   |   |  |  |  |  |  |  |  |         |    |     |                                                  |                          |                          |                          |                               |                          |                          |                          |                      |                          |                          |                          |               |                          |                          |                          |            |                          |                          |                          |                       |                          |                          |                          |                      |                          |                          |                          |             |                          |                          |                          |                                      |                          |                          |                          |                            |                          |                          |                          |            |                          |                          |                          |                    |                          |                          |                          |  |         |    |     |                |                          |                          |                          |                |                          |                          |                          |               |                          |                          |                          |                  |                          |                          |                          |                                                                                                                                                                                                                                                                                                                                                                                                                                                                                                                                                                                                                                                                                                                                                                                                                                                                                                                                                                                                                                                                                                                                                                                                                                                                                                                                                                                                                                                                                                                                                                                                                                                                                                                                                                                                                                                                                                                                                                                                                                                                                                                                                                                                                                                                                                                                                                                                                                                                                                                                                                                                                                                                                                                                                                                                                                                                                                                                                                                                                                                                                                                                                                                                                                                                                                                                                                                                                                                                                                                                                                                                                                                                                                                                                                                                                                                                                                                                                                                                                                                                                                                                                                                                                                                                                                                                                                                                                                                                                                                                                                                                                                                                                                                            |   |   |   |   |   |   |  |  |  |  |  |  |   |   |   |   |   |   |  |  |  |  |  |  |   |   |   |   |   |   |  |  |  |  |  |  |   |   |   |   |  |  |  |  |  |         |    |     |                        |                          |                          |                          |                 |                          |                          |                          |                                      |                          |                          |                          |   |   |   |   |   |   |  |  |  |  |  |  |   |   |   |   |  |  |  |  |                     |                          |                     |                          |                                     |                          |                                |                          |                                         |                          |                            |                          |                                              |                          |            |                          |
|                                                                                                                                                                                                                                                                                                                                                                                                                                                                                                                                                                                                                                                                                                                                                                                                                                                                                                                                                                                                                                                                                                                                                                                                                                                                                                                                                                                                                                                                                                                                                                                                                                                                                                                                                                                                                                                                                                                                                                                                                                                                                                                                                                                                                                                                                                                                                                                                                                                                                                                                                                                                                                                                                                                                                                                                                                                                                                                                                                                                                                                                                                                                                                                                                                                                                                                                                                                                                                                                                                                                                                                                                                                                                                                                                                                                                                                                                                                                                                                                                                                                                                                                                                                                                                                                                                                                                                                                                                                                                                                                                                                                                                                                                                                                                                                                                                                                                                                                                                                                                                                                                                                                                                                                                                                                                                                                                                                                                                                                                                                                                                                                                                                                           | Unknown                                                                                                                                                                                                                                                              | No                                                                                                                                        | Yes                      |   |   |   |  |  |  |  |  |  |  |         |    |     |                                                  |                          |                          |                          |                               |                          |                          |                          |                      |                          |                          |                          |               |                          |                          |                          |            |                          |                          |                          |                       |                          |                          |                          |                      |                          |                          |                          |             |                          |                          |                          |                                      |                          |                          |                          |                            |                          |                          |                          |            |                          |                          |                          |                    |                          |                          |                          |  |         |    |     |                |                          |                          |                          |                |                          |                          |                          |               |                          |                          |                          |                  |                          |                          |                          |                                                                                                                                                                                                                                                                                                                                                                                                                                                                                                                                                                                                                                                                                                                                                                                                                                                                                                                                                                                                                                                                                                                                                                                                                                                                                                                                                                                                                                                                                                                                                                                                                                                                                                                                                                                                                                                                                                                                                                                                                                                                                                                                                                                                                                                                                                                                                                                                                                                                                                                                                                                                                                                                                                                                                                                                                                                                                                                                                                                                                                                                                                                                                                                                                                                                                                                                                                                                                                                                                                                                                                                                                                                                                                                                                                                                                                                                                                                                                                                                                                                                                                                                                                                                                                                                                                                                                                                                                                                                                                                                                                                                                                                                                                                            |   |   |   |   |   |   |  |  |  |  |  |  |   |   |   |   |   |   |  |  |  |  |  |  |   |   |   |   |   |   |  |  |  |  |  |  |   |   |   |   |  |  |  |  |  |         |    |     |                        |                          |                          |                          |                 |                          |                          |                          |                                      |                          |                          |                          |   |   |   |   |   |   |  |  |  |  |  |  |   |   |   |   |  |  |  |  |                     |                          |                     |                          |                                     |                          |                                |                          |                                         |                          |                            |                          |                                              |                          |            |                          |
| a) Antibiotics                                                                                                                                                                                                                                                                                                                                                                                                                                                                                                                                                                                                                                                                                                                                                                                                                                                                                                                                                                                                                                                                                                                                                                                                                                                                                                                                                                                                                                                                                                                                                                                                                                                                                                                                                                                                                                                                                                                                                                                                                                                                                                                                                                                                                                                                                                                                                                                                                                                                                                                                                                                                                                                                                                                                                                                                                                                                                                                                                                                                                                                                                                                                                                                                                                                                                                                                                                                                                                                                                                                                                                                                                                                                                                                                                                                                                                                                                                                                                                                                                                                                                                                                                                                                                                                                                                                                                                                                                                                                                                                                                                                                                                                                                                                                                                                                                                                                                                                                                                                                                                                                                                                                                                                                                                                                                                                                                                                                                                                                                                                                                                                                                                                            | <input type="checkbox"/>                                                                                                                                                                                                                                             | <input type="checkbox"/>                                                                                                                  | <input type="checkbox"/> |   |   |   |  |  |  |  |  |  |  |         |    |     |                                                  |                          |                          |                          |                               |                          |                          |                          |                      |                          |                          |                          |               |                          |                          |                          |            |                          |                          |                          |                       |                          |                          |                          |                      |                          |                          |                          |             |                          |                          |                          |                                      |                          |                          |                          |                            |                          |                          |                          |            |                          |                          |                          |                    |                          |                          |                          |  |         |    |     |                |                          |                          |                          |                |                          |                          |                          |               |                          |                          |                          |                  |                          |                          |                          |                                                                                                                                                                                                                                                                                                                                                                                                                                                                                                                                                                                                                                                                                                                                                                                                                                                                                                                                                                                                                                                                                                                                                                                                                                                                                                                                                                                                                                                                                                                                                                                                                                                                                                                                                                                                                                                                                                                                                                                                                                                                                                                                                                                                                                                                                                                                                                                                                                                                                                                                                                                                                                                                                                                                                                                                                                                                                                                                                                                                                                                                                                                                                                                                                                                                                                                                                                                                                                                                                                                                                                                                                                                                                                                                                                                                                                                                                                                                                                                                                                                                                                                                                                                                                                                                                                                                                                                                                                                                                                                                                                                                                                                                                                                            |   |   |   |   |   |   |  |  |  |  |  |  |   |   |   |   |   |   |  |  |  |  |  |  |   |   |   |   |   |   |  |  |  |  |  |  |   |   |   |   |  |  |  |  |  |         |    |     |                        |                          |                          |                          |                 |                          |                          |                          |                                      |                          |                          |                          |   |   |   |   |   |   |  |  |  |  |  |  |   |   |   |   |  |  |  |  |                     |                          |                     |                          |                                     |                          |                                |                          |                                         |                          |                            |                          |                                              |                          |            |                          |
| b) Antifungals                                                                                                                                                                                                                                                                                                                                                                                                                                                                                                                                                                                                                                                                                                                                                                                                                                                                                                                                                                                                                                                                                                                                                                                                                                                                                                                                                                                                                                                                                                                                                                                                                                                                                                                                                                                                                                                                                                                                                                                                                                                                                                                                                                                                                                                                                                                                                                                                                                                                                                                                                                                                                                                                                                                                                                                                                                                                                                                                                                                                                                                                                                                                                                                                                                                                                                                                                                                                                                                                                                                                                                                                                                                                                                                                                                                                                                                                                                                                                                                                                                                                                                                                                                                                                                                                                                                                                                                                                                                                                                                                                                                                                                                                                                                                                                                                                                                                                                                                                                                                                                                                                                                                                                                                                                                                                                                                                                                                                                                                                                                                                                                                                                                            | <input type="checkbox"/>                                                                                                                                                                                                                                             | <input type="checkbox"/>                                                                                                                  | <input type="checkbox"/> |   |   |   |  |  |  |  |  |  |  |         |    |     |                                                  |                          |                          |                          |                               |                          |                          |                          |                      |                          |                          |                          |               |                          |                          |                          |            |                          |                          |                          |                       |                          |                          |                          |                      |                          |                          |                          |             |                          |                          |                          |                                      |                          |                          |                          |                            |                          |                          |                          |            |                          |                          |                          |                    |                          |                          |                          |  |         |    |     |                |                          |                          |                          |                |                          |                          |                          |               |                          |                          |                          |                  |                          |                          |                          |                                                                                                                                                                                                                                                                                                                                                                                                                                                                                                                                                                                                                                                                                                                                                                                                                                                                                                                                                                                                                                                                                                                                                                                                                                                                                                                                                                                                                                                                                                                                                                                                                                                                                                                                                                                                                                                                                                                                                                                                                                                                                                                                                                                                                                                                                                                                                                                                                                                                                                                                                                                                                                                                                                                                                                                                                                                                                                                                                                                                                                                                                                                                                                                                                                                                                                                                                                                                                                                                                                                                                                                                                                                                                                                                                                                                                                                                                                                                                                                                                                                                                                                                                                                                                                                                                                                                                                                                                                                                                                                                                                                                                                                                                                                            |   |   |   |   |   |   |  |  |  |  |  |  |   |   |   |   |   |   |  |  |  |  |  |  |   |   |   |   |   |   |  |  |  |  |  |  |   |   |   |   |  |  |  |  |  |         |    |     |                        |                          |                          |                          |                 |                          |                          |                          |                                      |                          |                          |                          |   |   |   |   |   |   |  |  |  |  |  |  |   |   |   |   |  |  |  |  |                     |                          |                     |                          |                                     |                          |                                |                          |                                         |                          |                            |                          |                                              |                          |            |                          |
| c) Antivirals                                                                                                                                                                                                                                                                                                                                                                                                                                                                                                                                                                                                                                                                                                                                                                                                                                                                                                                                                                                                                                                                                                                                                                                                                                                                                                                                                                                                                                                                                                                                                                                                                                                                                                                                                                                                                                                                                                                                                                                                                                                                                                                                                                                                                                                                                                                                                                                                                                                                                                                                                                                                                                                                                                                                                                                                                                                                                                                                                                                                                                                                                                                                                                                                                                                                                                                                                                                                                                                                                                                                                                                                                                                                                                                                                                                                                                                                                                                                                                                                                                                                                                                                                                                                                                                                                                                                                                                                                                                                                                                                                                                                                                                                                                                                                                                                                                                                                                                                                                                                                                                                                                                                                                                                                                                                                                                                                                                                                                                                                                                                                                                                                                                             | <input type="checkbox"/>                                                                                                                                                                                                                                             | <input type="checkbox"/>                                                                                                                  | <input type="checkbox"/> |   |   |   |  |  |  |  |  |  |  |         |    |     |                                                  |                          |                          |                          |                               |                          |                          |                          |                      |                          |                          |                          |               |                          |                          |                          |            |                          |                          |                          |                       |                          |                          |                          |                      |                          |                          |                          |             |                          |                          |                          |                                      |                          |                          |                          |                            |                          |                          |                          |            |                          |                          |                          |                    |                          |                          |                          |  |         |    |     |                |                          |                          |                          |                |                          |                          |                          |               |                          |                          |                          |                  |                          |                          |                          |                                                                                                                                                                                                                                                                                                                                                                                                                                                                                                                                                                                                                                                                                                                                                                                                                                                                                                                                                                                                                                                                                                                                                                                                                                                                                                                                                                                                                                                                                                                                                                                                                                                                                                                                                                                                                                                                                                                                                                                                                                                                                                                                                                                                                                                                                                                                                                                                                                                                                                                                                                                                                                                                                                                                                                                                                                                                                                                                                                                                                                                                                                                                                                                                                                                                                                                                                                                                                                                                                                                                                                                                                                                                                                                                                                                                                                                                                                                                                                                                                                                                                                                                                                                                                                                                                                                                                                                                                                                                                                                                                                                                                                                                                                                            |   |   |   |   |   |   |  |  |  |  |  |  |   |   |   |   |   |   |  |  |  |  |  |  |   |   |   |   |   |   |  |  |  |  |  |  |   |   |   |   |  |  |  |  |  |         |    |     |                        |                          |                          |                          |                 |                          |                          |                          |                                      |                          |                          |                          |   |   |   |   |   |   |  |  |  |  |  |  |   |   |   |   |  |  |  |  |                     |                          |                     |                          |                                     |                          |                                |                          |                                         |                          |                            |                          |                                              |                          |            |                          |
| d) Antimalarials                                                                                                                                                                                                                                                                                                                                                                                                                                                                                                                                                                                                                                                                                                                                                                                                                                                                                                                                                                                                                                                                                                                                                                                                                                                                                                                                                                                                                                                                                                                                                                                                                                                                                                                                                                                                                                                                                                                                                                                                                                                                                                                                                                                                                                                                                                                                                                                                                                                                                                                                                                                                                                                                                                                                                                                                                                                                                                                                                                                                                                                                                                                                                                                                                                                                                                                                                                                                                                                                                                                                                                                                                                                                                                                                                                                                                                                                                                                                                                                                                                                                                                                                                                                                                                                                                                                                                                                                                                                                                                                                                                                                                                                                                                                                                                                                                                                                                                                                                                                                                                                                                                                                                                                                                                                                                                                                                                                                                                                                                                                                                                                                                                                          | <input type="checkbox"/>                                                                                                                                                                                                                                             | <input type="checkbox"/>                                                                                                                  | <input type="checkbox"/> |   |   |   |  |  |  |  |  |  |  |         |    |     |                                                  |                          |                          |                          |                               |                          |                          |                          |                      |                          |                          |                          |               |                          |                          |                          |            |                          |                          |                          |                       |                          |                          |                          |                      |                          |                          |                          |             |                          |                          |                          |                                      |                          |                          |                          |                            |                          |                          |                          |            |                          |                          |                          |                    |                          |                          |                          |  |         |    |     |                |                          |                          |                          |                |                          |                          |                          |               |                          |                          |                          |                  |                          |                          |                          |                                                                                                                                                                                                                                                                                                                                                                                                                                                                                                                                                                                                                                                                                                                                                                                                                                                                                                                                                                                                                                                                                                                                                                                                                                                                                                                                                                                                                                                                                                                                                                                                                                                                                                                                                                                                                                                                                                                                                                                                                                                                                                                                                                                                                                                                                                                                                                                                                                                                                                                                                                                                                                                                                                                                                                                                                                                                                                                                                                                                                                                                                                                                                                                                                                                                                                                                                                                                                                                                                                                                                                                                                                                                                                                                                                                                                                                                                                                                                                                                                                                                                                                                                                                                                                                                                                                                                                                                                                                                                                                                                                                                                                                                                                                            |   |   |   |   |   |   |  |  |  |  |  |  |   |   |   |   |   |   |  |  |  |  |  |  |   |   |   |   |   |   |  |  |  |  |  |  |   |   |   |   |  |  |  |  |  |         |    |     |                        |                          |                          |                          |                 |                          |                          |                          |                                      |                          |                          |                          |   |   |   |   |   |   |  |  |  |  |  |  |   |   |   |   |  |  |  |  |                     |                          |                     |                          |                                     |                          |                                |                          |                                         |                          |                            |                          |                                              |                          |            |                          |
| d                                                                                                                                                                                                                                                                                                                                                                                                                                                                                                                                                                                                                                                                                                                                                                                                                                                                                                                                                                                                                                                                                                                                                                                                                                                                                                                                                                                                                                                                                                                                                                                                                                                                                                                                                                                                                                                                                                                                                                                                                                                                                                                                                                                                                                                                                                                                                                                                                                                                                                                                                                                                                                                                                                                                                                                                                                                                                                                                                                                                                                                                                                                                                                                                                                                                                                                                                                                                                                                                                                                                                                                                                                                                                                                                                                                                                                                                                                                                                                                                                                                                                                                                                                                                                                                                                                                                                                                                                                                                                                                                                                                                                                                                                                                                                                                                                                                                                                                                                                                                                                                                                                                                                                                                                                                                                                                                                                                                                                                                                                                                                                                                                                                                         | d                                                                                                                                                                                                                                                                    | m                                                                                                                                         | m                        | y | y |   |  |  |  |  |  |  |  |         |    |     |                                                  |                          |                          |                          |                               |                          |                          |                          |                      |                          |                          |                          |               |                          |                          |                          |            |                          |                          |                          |                       |                          |                          |                          |                      |                          |                          |                          |             |                          |                          |                          |                                      |                          |                          |                          |                            |                          |                          |                          |            |                          |                          |                          |                    |                          |                          |                          |  |         |    |     |                |                          |                          |                          |                |                          |                          |                          |               |                          |                          |                          |                  |                          |                          |                          |                                                                                                                                                                                                                                                                                                                                                                                                                                                                                                                                                                                                                                                                                                                                                                                                                                                                                                                                                                                                                                                                                                                                                                                                                                                                                                                                                                                                                                                                                                                                                                                                                                                                                                                                                                                                                                                                                                                                                                                                                                                                                                                                                                                                                                                                                                                                                                                                                                                                                                                                                                                                                                                                                                                                                                                                                                                                                                                                                                                                                                                                                                                                                                                                                                                                                                                                                                                                                                                                                                                                                                                                                                                                                                                                                                                                                                                                                                                                                                                                                                                                                                                                                                                                                                                                                                                                                                                                                                                                                                                                                                                                                                                                                                                            |   |   |   |   |   |   |  |  |  |  |  |  |   |   |   |   |   |   |  |  |  |  |  |  |   |   |   |   |   |   |  |  |  |  |  |  |   |   |   |   |  |  |  |  |  |         |    |     |                        |                          |                          |                          |                 |                          |                          |                          |                                      |                          |                          |                          |   |   |   |   |   |   |  |  |  |  |  |  |   |   |   |   |  |  |  |  |                     |                          |                     |                          |                                     |                          |                                |                          |                                         |                          |                            |                          |                                              |                          |            |                          |
|                                                                                                                                                                                                                                                                                                                                                                                                                                                                                                                                                                                                                                                                                                                                                                                                                                                                                                                                                                                                                                                                                                                                                                                                                                                                                                                                                                                                                                                                                                                                                                                                                                                                                                                                                                                                                                                                                                                                                                                                                                                                                                                                                                                                                                                                                                                                                                                                                                                                                                                                                                                                                                                                                                                                                                                                                                                                                                                                                                                                                                                                                                                                                                                                                                                                                                                                                                                                                                                                                                                                                                                                                                                                                                                                                                                                                                                                                                                                                                                                                                                                                                                                                                                                                                                                                                                                                                                                                                                                                                                                                                                                                                                                                                                                                                                                                                                                                                                                                                                                                                                                                                                                                                                                                                                                                                                                                                                                                                                                                                                                                                                                                                                                           |                                                                                                                                                                                                                                                                      |                                                                                                                                           |                          |   |   |   |  |  |  |  |  |  |  |         |    |     |                                                  |                          |                          |                          |                               |                          |                          |                          |                      |                          |                          |                          |               |                          |                          |                          |            |                          |                          |                          |                       |                          |                          |                          |                      |                          |                          |                          |             |                          |                          |                          |                                      |                          |                          |                          |                            |                          |                          |                          |            |                          |                          |                          |                    |                          |                          |                          |  |         |    |     |                |                          |                          |                          |                |                          |                          |                          |               |                          |                          |                          |                  |                          |                          |                          |                                                                                                                                                                                                                                                                                                                                                                                                                                                                                                                                                                                                                                                                                                                                                                                                                                                                                                                                                                                                                                                                                                                                                                                                                                                                                                                                                                                                                                                                                                                                                                                                                                                                                                                                                                                                                                                                                                                                                                                                                                                                                                                                                                                                                                                                                                                                                                                                                                                                                                                                                                                                                                                                                                                                                                                                                                                                                                                                                                                                                                                                                                                                                                                                                                                                                                                                                                                                                                                                                                                                                                                                                                                                                                                                                                                                                                                                                                                                                                                                                                                                                                                                                                                                                                                                                                                                                                                                                                                                                                                                                                                                                                                                                                                            |   |   |   |   |   |   |  |  |  |  |  |  |   |   |   |   |   |   |  |  |  |  |  |  |   |   |   |   |   |   |  |  |  |  |  |  |   |   |   |   |  |  |  |  |  |         |    |     |                        |                          |                          |                          |                 |                          |                          |                          |                                      |                          |                          |                          |   |   |   |   |   |   |  |  |  |  |  |  |   |   |   |   |  |  |  |  |                     |                          |                     |                          |                                     |                          |                                |                          |                                         |                          |                            |                          |                                              |                          |            |                          |
| d                                                                                                                                                                                                                                                                                                                                                                                                                                                                                                                                                                                                                                                                                                                                                                                                                                                                                                                                                                                                                                                                                                                                                                                                                                                                                                                                                                                                                                                                                                                                                                                                                                                                                                                                                                                                                                                                                                                                                                                                                                                                                                                                                                                                                                                                                                                                                                                                                                                                                                                                                                                                                                                                                                                                                                                                                                                                                                                                                                                                                                                                                                                                                                                                                                                                                                                                                                                                                                                                                                                                                                                                                                                                                                                                                                                                                                                                                                                                                                                                                                                                                                                                                                                                                                                                                                                                                                                                                                                                                                                                                                                                                                                                                                                                                                                                                                                                                                                                                                                                                                                                                                                                                                                                                                                                                                                                                                                                                                                                                                                                                                                                                                                                         | d                                                                                                                                                                                                                                                                    | m                                                                                                                                         | m                        | y | y |   |  |  |  |  |  |  |  |         |    |     |                                                  |                          |                          |                          |                               |                          |                          |                          |                      |                          |                          |                          |               |                          |                          |                          |            |                          |                          |                          |                       |                          |                          |                          |                      |                          |                          |                          |             |                          |                          |                          |                                      |                          |                          |                          |                            |                          |                          |                          |            |                          |                          |                          |                    |                          |                          |                          |  |         |    |     |                |                          |                          |                          |                |                          |                          |                          |               |                          |                          |                          |                  |                          |                          |                          |                                                                                                                                                                                                                                                                                                                                                                                                                                                                                                                                                                                                                                                                                                                                                                                                                                                                                                                                                                                                                                                                                                                                                                                                                                                                                                                                                                                                                                                                                                                                                                                                                                                                                                                                                                                                                                                                                                                                                                                                                                                                                                                                                                                                                                                                                                                                                                                                                                                                                                                                                                                                                                                                                                                                                                                                                                                                                                                                                                                                                                                                                                                                                                                                                                                                                                                                                                                                                                                                                                                                                                                                                                                                                                                                                                                                                                                                                                                                                                                                                                                                                                                                                                                                                                                                                                                                                                                                                                                                                                                                                                                                                                                                                                                            |   |   |   |   |   |   |  |  |  |  |  |  |   |   |   |   |   |   |  |  |  |  |  |  |   |   |   |   |   |   |  |  |  |  |  |  |   |   |   |   |  |  |  |  |  |         |    |     |                        |                          |                          |                          |                 |                          |                          |                          |                                      |                          |                          |                          |   |   |   |   |   |   |  |  |  |  |  |  |   |   |   |   |  |  |  |  |                     |                          |                     |                          |                                     |                          |                                |                          |                                         |                          |                            |                          |                                              |                          |            |                          |
|                                                                                                                                                                                                                                                                                                                                                                                                                                                                                                                                                                                                                                                                                                                                                                                                                                                                                                                                                                                                                                                                                                                                                                                                                                                                                                                                                                                                                                                                                                                                                                                                                                                                                                                                                                                                                                                                                                                                                                                                                                                                                                                                                                                                                                                                                                                                                                                                                                                                                                                                                                                                                                                                                                                                                                                                                                                                                                                                                                                                                                                                                                                                                                                                                                                                                                                                                                                                                                                                                                                                                                                                                                                                                                                                                                                                                                                                                                                                                                                                                                                                                                                                                                                                                                                                                                                                                                                                                                                                                                                                                                                                                                                                                                                                                                                                                                                                                                                                                                                                                                                                                                                                                                                                                                                                                                                                                                                                                                                                                                                                                                                                                                                                           |                                                                                                                                                                                                                                                                      |                                                                                                                                           |                          |   |   |   |  |  |  |  |  |  |  |         |    |     |                                                  |                          |                          |                          |                               |                          |                          |                          |                      |                          |                          |                          |               |                          |                          |                          |            |                          |                          |                          |                       |                          |                          |                          |                      |                          |                          |                          |             |                          |                          |                          |                                      |                          |                          |                          |                            |                          |                          |                          |            |                          |                          |                          |                    |                          |                          |                          |  |         |    |     |                |                          |                          |                          |                |                          |                          |                          |               |                          |                          |                          |                  |                          |                          |                          |                                                                                                                                                                                                                                                                                                                                                                                                                                                                                                                                                                                                                                                                                                                                                                                                                                                                                                                                                                                                                                                                                                                                                                                                                                                                                                                                                                                                                                                                                                                                                                                                                                                                                                                                                                                                                                                                                                                                                                                                                                                                                                                                                                                                                                                                                                                                                                                                                                                                                                                                                                                                                                                                                                                                                                                                                                                                                                                                                                                                                                                                                                                                                                                                                                                                                                                                                                                                                                                                                                                                                                                                                                                                                                                                                                                                                                                                                                                                                                                                                                                                                                                                                                                                                                                                                                                                                                                                                                                                                                                                                                                                                                                                                                                            |   |   |   |   |   |   |  |  |  |  |  |  |   |   |   |   |   |   |  |  |  |  |  |  |   |   |   |   |   |   |  |  |  |  |  |  |   |   |   |   |  |  |  |  |  |         |    |     |                        |                          |                          |                          |                 |                          |                          |                          |                                      |                          |                          |                          |   |   |   |   |   |   |  |  |  |  |  |  |   |   |   |   |  |  |  |  |                     |                          |                     |                          |                                     |                          |                                |                          |                                         |                          |                            |                          |                                              |                          |            |                          |
| d                                                                                                                                                                                                                                                                                                                                                                                                                                                                                                                                                                                                                                                                                                                                                                                                                                                                                                                                                                                                                                                                                                                                                                                                                                                                                                                                                                                                                                                                                                                                                                                                                                                                                                                                                                                                                                                                                                                                                                                                                                                                                                                                                                                                                                                                                                                                                                                                                                                                                                                                                                                                                                                                                                                                                                                                                                                                                                                                                                                                                                                                                                                                                                                                                                                                                                                                                                                                                                                                                                                                                                                                                                                                                                                                                                                                                                                                                                                                                                                                                                                                                                                                                                                                                                                                                                                                                                                                                                                                                                                                                                                                                                                                                                                                                                                                                                                                                                                                                                                                                                                                                                                                                                                                                                                                                                                                                                                                                                                                                                                                                                                                                                                                         | d                                                                                                                                                                                                                                                                    | m                                                                                                                                         | m                        | y | y |   |  |  |  |  |  |  |  |         |    |     |                                                  |                          |                          |                          |                               |                          |                          |                          |                      |                          |                          |                          |               |                          |                          |                          |            |                          |                          |                          |                       |                          |                          |                          |                      |                          |                          |                          |             |                          |                          |                          |                                      |                          |                          |                          |                            |                          |                          |                          |            |                          |                          |                          |                    |                          |                          |                          |  |         |    |     |                |                          |                          |                          |                |                          |                          |                          |               |                          |                          |                          |                  |                          |                          |                          |                                                                                                                                                                                                                                                                                                                                                                                                                                                                                                                                                                                                                                                                                                                                                                                                                                                                                                                                                                                                                                                                                                                                                                                                                                                                                                                                                                                                                                                                                                                                                                                                                                                                                                                                                                                                                                                                                                                                                                                                                                                                                                                                                                                                                                                                                                                                                                                                                                                                                                                                                                                                                                                                                                                                                                                                                                                                                                                                                                                                                                                                                                                                                                                                                                                                                                                                                                                                                                                                                                                                                                                                                                                                                                                                                                                                                                                                                                                                                                                                                                                                                                                                                                                                                                                                                                                                                                                                                                                                                                                                                                                                                                                                                                                            |   |   |   |   |   |   |  |  |  |  |  |  |   |   |   |   |   |   |  |  |  |  |  |  |   |   |   |   |   |   |  |  |  |  |  |  |   |   |   |   |  |  |  |  |  |         |    |     |                        |                          |                          |                          |                 |                          |                          |                          |                                      |                          |                          |                          |   |   |   |   |   |   |  |  |  |  |  |  |   |   |   |   |  |  |  |  |                     |                          |                     |                          |                                     |                          |                                |                          |                                         |                          |                            |                          |                                              |                          |            |                          |
|                                                                                                                                                                                                                                                                                                                                                                                                                                                                                                                                                                                                                                                                                                                                                                                                                                                                                                                                                                                                                                                                                                                                                                                                                                                                                                                                                                                                                                                                                                                                                                                                                                                                                                                                                                                                                                                                                                                                                                                                                                                                                                                                                                                                                                                                                                                                                                                                                                                                                                                                                                                                                                                                                                                                                                                                                                                                                                                                                                                                                                                                                                                                                                                                                                                                                                                                                                                                                                                                                                                                                                                                                                                                                                                                                                                                                                                                                                                                                                                                                                                                                                                                                                                                                                                                                                                                                                                                                                                                                                                                                                                                                                                                                                                                                                                                                                                                                                                                                                                                                                                                                                                                                                                                                                                                                                                                                                                                                                                                                                                                                                                                                                                                           |                                                                                                                                                                                                                                                                      |                                                                                                                                           |                          |   |   |   |  |  |  |  |  |  |  |         |    |     |                                                  |                          |                          |                          |                               |                          |                          |                          |                      |                          |                          |                          |               |                          |                          |                          |            |                          |                          |                          |                       |                          |                          |                          |                      |                          |                          |                          |             |                          |                          |                          |                                      |                          |                          |                          |                            |                          |                          |                          |            |                          |                          |                          |                    |                          |                          |                          |  |         |    |     |                |                          |                          |                          |                |                          |                          |                          |               |                          |                          |                          |                  |                          |                          |                          |                                                                                                                                                                                                                                                                                                                                                                                                                                                                                                                                                                                                                                                                                                                                                                                                                                                                                                                                                                                                                                                                                                                                                                                                                                                                                                                                                                                                                                                                                                                                                                                                                                                                                                                                                                                                                                                                                                                                                                                                                                                                                                                                                                                                                                                                                                                                                                                                                                                                                                                                                                                                                                                                                                                                                                                                                                                                                                                                                                                                                                                                                                                                                                                                                                                                                                                                                                                                                                                                                                                                                                                                                                                                                                                                                                                                                                                                                                                                                                                                                                                                                                                                                                                                                                                                                                                                                                                                                                                                                                                                                                                                                                                                                                                            |   |   |   |   |   |   |  |  |  |  |  |  |   |   |   |   |   |   |  |  |  |  |  |  |   |   |   |   |   |   |  |  |  |  |  |  |   |   |   |   |  |  |  |  |  |         |    |     |                        |                          |                          |                          |                 |                          |                          |                          |                                      |                          |                          |                          |   |   |   |   |   |   |  |  |  |  |  |  |   |   |   |   |  |  |  |  |                     |                          |                     |                          |                                     |                          |                                |                          |                                         |                          |                            |                          |                                              |                          |            |                          |
| h                                                                                                                                                                                                                                                                                                                                                                                                                                                                                                                                                                                                                                                                                                                                                                                                                                                                                                                                                                                                                                                                                                                                                                                                                                                                                                                                                                                                                                                                                                                                                                                                                                                                                                                                                                                                                                                                                                                                                                                                                                                                                                                                                                                                                                                                                                                                                                                                                                                                                                                                                                                                                                                                                                                                                                                                                                                                                                                                                                                                                                                                                                                                                                                                                                                                                                                                                                                                                                                                                                                                                                                                                                                                                                                                                                                                                                                                                                                                                                                                                                                                                                                                                                                                                                                                                                                                                                                                                                                                                                                                                                                                                                                                                                                                                                                                                                                                                                                                                                                                                                                                                                                                                                                                                                                                                                                                                                                                                                                                                                                                                                                                                                                                         | h                                                                                                                                                                                                                                                                    | m                                                                                                                                         | m                        |   |   |   |  |  |  |  |  |  |  |         |    |     |                                                  |                          |                          |                          |                               |                          |                          |                          |                      |                          |                          |                          |               |                          |                          |                          |            |                          |                          |                          |                       |                          |                          |                          |                      |                          |                          |                          |             |                          |                          |                          |                                      |                          |                          |                          |                            |                          |                          |                          |            |                          |                          |                          |                    |                          |                          |                          |  |         |    |     |                |                          |                          |                          |                |                          |                          |                          |               |                          |                          |                          |                  |                          |                          |                          |                                                                                                                                                                                                                                                                                                                                                                                                                                                                                                                                                                                                                                                                                                                                                                                                                                                                                                                                                                                                                                                                                                                                                                                                                                                                                                                                                                                                                                                                                                                                                                                                                                                                                                                                                                                                                                                                                                                                                                                                                                                                                                                                                                                                                                                                                                                                                                                                                                                                                                                                                                                                                                                                                                                                                                                                                                                                                                                                                                                                                                                                                                                                                                                                                                                                                                                                                                                                                                                                                                                                                                                                                                                                                                                                                                                                                                                                                                                                                                                                                                                                                                                                                                                                                                                                                                                                                                                                                                                                                                                                                                                                                                                                                                                            |   |   |   |   |   |   |  |  |  |  |  |  |   |   |   |   |   |   |  |  |  |  |  |  |   |   |   |   |   |   |  |  |  |  |  |  |   |   |   |   |  |  |  |  |  |         |    |     |                        |                          |                          |                          |                 |                          |                          |                          |                                      |                          |                          |                          |   |   |   |   |   |   |  |  |  |  |  |  |   |   |   |   |  |  |  |  |                     |                          |                     |                          |                                     |                          |                                |                          |                                         |                          |                            |                          |                                              |                          |            |                          |
|                                                                                                                                                                                                                                                                                                                                                                                                                                                                                                                                                                                                                                                                                                                                                                                                                                                                                                                                                                                                                                                                                                                                                                                                                                                                                                                                                                                                                                                                                                                                                                                                                                                                                                                                                                                                                                                                                                                                                                                                                                                                                                                                                                                                                                                                                                                                                                                                                                                                                                                                                                                                                                                                                                                                                                                                                                                                                                                                                                                                                                                                                                                                                                                                                                                                                                                                                                                                                                                                                                                                                                                                                                                                                                                                                                                                                                                                                                                                                                                                                                                                                                                                                                                                                                                                                                                                                                                                                                                                                                                                                                                                                                                                                                                                                                                                                                                                                                                                                                                                                                                                                                                                                                                                                                                                                                                                                                                                                                                                                                                                                                                                                                                                           |                                                                                                                                                                                                                                                                      |                                                                                                                                           |                          |   |   |   |  |  |  |  |  |  |  |         |    |     |                                                  |                          |                          |                          |                               |                          |                          |                          |                      |                          |                          |                          |               |                          |                          |                          |            |                          |                          |                          |                       |                          |                          |                          |                      |                          |                          |                          |             |                          |                          |                          |                                      |                          |                          |                          |                            |                          |                          |                          |            |                          |                          |                          |                    |                          |                          |                          |  |         |    |     |                |                          |                          |                          |                |                          |                          |                          |               |                          |                          |                          |                  |                          |                          |                          |                                                                                                                                                                                                                                                                                                                                                                                                                                                                                                                                                                                                                                                                                                                                                                                                                                                                                                                                                                                                                                                                                                                                                                                                                                                                                                                                                                                                                                                                                                                                                                                                                                                                                                                                                                                                                                                                                                                                                                                                                                                                                                                                                                                                                                                                                                                                                                                                                                                                                                                                                                                                                                                                                                                                                                                                                                                                                                                                                                                                                                                                                                                                                                                                                                                                                                                                                                                                                                                                                                                                                                                                                                                                                                                                                                                                                                                                                                                                                                                                                                                                                                                                                                                                                                                                                                                                                                                                                                                                                                                                                                                                                                                                                                                            |   |   |   |   |   |   |  |  |  |  |  |  |   |   |   |   |   |   |  |  |  |  |  |  |   |   |   |   |   |   |  |  |  |  |  |  |   |   |   |   |  |  |  |  |  |         |    |     |                        |                          |                          |                          |                 |                          |                          |                          |                                      |                          |                          |                          |   |   |   |   |   |   |  |  |  |  |  |  |   |   |   |   |  |  |  |  |                     |                          |                     |                          |                                     |                          |                                |                          |                                         |                          |                            |                          |                                              |                          |            |                          |
|                                                                                                                                                                                                                                                                                                                                                                                                                                                                                                                                                                                                                                                                                                                                                                                                                                                                                                                                                                                                                                                                                                                                                                                                                                                                                                                                                                                                                                                                                                                                                                                                                                                                                                                                                                                                                                                                                                                                                                                                                                                                                                                                                                                                                                                                                                                                                                                                                                                                                                                                                                                                                                                                                                                                                                                                                                                                                                                                                                                                                                                                                                                                                                                                                                                                                                                                                                                                                                                                                                                                                                                                                                                                                                                                                                                                                                                                                                                                                                                                                                                                                                                                                                                                                                                                                                                                                                                                                                                                                                                                                                                                                                                                                                                                                                                                                                                                                                                                                                                                                                                                                                                                                                                                                                                                                                                                                                                                                                                                                                                                                                                                                                                                           | Unknown                                                                                                                                                                                                                                                              | No                                                                                                                                        | Yes                      |   |   |   |  |  |  |  |  |  |  |         |    |     |                                                  |                          |                          |                          |                               |                          |                          |                          |                      |                          |                          |                          |               |                          |                          |                          |            |                          |                          |                          |                       |                          |                          |                          |                      |                          |                          |                          |             |                          |                          |                          |                                      |                          |                          |                          |                            |                          |                          |                          |            |                          |                          |                          |                    |                          |                          |                          |  |         |    |     |                |                          |                          |                          |                |                          |                          |                          |               |                          |                          |                          |                  |                          |                          |                          |                                                                                                                                                                                                                                                                                                                                                                                                                                                                                                                                                                                                                                                                                                                                                                                                                                                                                                                                                                                                                                                                                                                                                                                                                                                                                                                                                                                                                                                                                                                                                                                                                                                                                                                                                                                                                                                                                                                                                                                                                                                                                                                                                                                                                                                                                                                                                                                                                                                                                                                                                                                                                                                                                                                                                                                                                                                                                                                                                                                                                                                                                                                                                                                                                                                                                                                                                                                                                                                                                                                                                                                                                                                                                                                                                                                                                                                                                                                                                                                                                                                                                                                                                                                                                                                                                                                                                                                                                                                                                                                                                                                                                                                                                                                            |   |   |   |   |   |   |  |  |  |  |  |  |   |   |   |   |   |   |  |  |  |  |  |  |   |   |   |   |   |   |  |  |  |  |  |  |   |   |   |   |  |  |  |  |  |         |    |     |                        |                          |                          |                          |                 |                          |                          |                          |                                      |                          |                          |                          |   |   |   |   |   |   |  |  |  |  |  |  |   |   |   |   |  |  |  |  |                     |                          |                     |                          |                                     |                          |                                |                          |                                         |                          |                            |                          |                                              |                          |            |                          |
| a) At home / community                                                                                                                                                                                                                                                                                                                                                                                                                                                                                                                                                                                                                                                                                                                                                                                                                                                                                                                                                                                                                                                                                                                                                                                                                                                                                                                                                                                                                                                                                                                                                                                                                                                                                                                                                                                                                                                                                                                                                                                                                                                                                                                                                                                                                                                                                                                                                                                                                                                                                                                                                                                                                                                                                                                                                                                                                                                                                                                                                                                                                                                                                                                                                                                                                                                                                                                                                                                                                                                                                                                                                                                                                                                                                                                                                                                                                                                                                                                                                                                                                                                                                                                                                                                                                                                                                                                                                                                                                                                                                                                                                                                                                                                                                                                                                                                                                                                                                                                                                                                                                                                                                                                                                                                                                                                                                                                                                                                                                                                                                                                                                                                                                                                    | <input type="checkbox"/>                                                                                                                                                                                                                                             | <input type="checkbox"/>                                                                                                                  | <input type="checkbox"/> |   |   |   |  |  |  |  |  |  |  |         |    |     |                                                  |                          |                          |                          |                               |                          |                          |                          |                      |                          |                          |                          |               |                          |                          |                          |            |                          |                          |                          |                       |                          |                          |                          |                      |                          |                          |                          |             |                          |                          |                          |                                      |                          |                          |                          |                            |                          |                          |                          |            |                          |                          |                          |                    |                          |                          |                          |  |         |    |     |                |                          |                          |                          |                |                          |                          |                          |               |                          |                          |                          |                  |                          |                          |                          |                                                                                                                                                                                                                                                                                                                                                                                                                                                                                                                                                                                                                                                                                                                                                                                                                                                                                                                                                                                                                                                                                                                                                                                                                                                                                                                                                                                                                                                                                                                                                                                                                                                                                                                                                                                                                                                                                                                                                                                                                                                                                                                                                                                                                                                                                                                                                                                                                                                                                                                                                                                                                                                                                                                                                                                                                                                                                                                                                                                                                                                                                                                                                                                                                                                                                                                                                                                                                                                                                                                                                                                                                                                                                                                                                                                                                                                                                                                                                                                                                                                                                                                                                                                                                                                                                                                                                                                                                                                                                                                                                                                                                                                                                                                            |   |   |   |   |   |   |  |  |  |  |  |  |   |   |   |   |   |   |  |  |  |  |  |  |   |   |   |   |   |   |  |  |  |  |  |  |   |   |   |   |  |  |  |  |  |         |    |     |                        |                          |                          |                          |                 |                          |                          |                          |                                      |                          |                          |                          |   |   |   |   |   |   |  |  |  |  |  |  |   |   |   |   |  |  |  |  |                     |                          |                     |                          |                                     |                          |                                |                          |                                         |                          |                            |                          |                                              |                          |            |                          |
| b) In ambulance                                                                                                                                                                                                                                                                                                                                                                                                                                                                                                                                                                                                                                                                                                                                                                                                                                                                                                                                                                                                                                                                                                                                                                                                                                                                                                                                                                                                                                                                                                                                                                                                                                                                                                                                                                                                                                                                                                                                                                                                                                                                                                                                                                                                                                                                                                                                                                                                                                                                                                                                                                                                                                                                                                                                                                                                                                                                                                                                                                                                                                                                                                                                                                                                                                                                                                                                                                                                                                                                                                                                                                                                                                                                                                                                                                                                                                                                                                                                                                                                                                                                                                                                                                                                                                                                                                                                                                                                                                                                                                                                                                                                                                                                                                                                                                                                                                                                                                                                                                                                                                                                                                                                                                                                                                                                                                                                                                                                                                                                                                                                                                                                                                                           | <input type="checkbox"/>                                                                                                                                                                                                                                             | <input type="checkbox"/>                                                                                                                  | <input type="checkbox"/> |   |   |   |  |  |  |  |  |  |  |         |    |     |                                                  |                          |                          |                          |                               |                          |                          |                          |                      |                          |                          |                          |               |                          |                          |                          |            |                          |                          |                          |                       |                          |                          |                          |                      |                          |                          |                          |             |                          |                          |                          |                                      |                          |                          |                          |                            |                          |                          |                          |            |                          |                          |                          |                    |                          |                          |                          |  |         |    |     |                |                          |                          |                          |                |                          |                          |                          |               |                          |                          |                          |                  |                          |                          |                          |                                                                                                                                                                                                                                                                                                                                                                                                                                                                                                                                                                                                                                                                                                                                                                                                                                                                                                                                                                                                                                                                                                                                                                                                                                                                                                                                                                                                                                                                                                                                                                                                                                                                                                                                                                                                                                                                                                                                                                                                                                                                                                                                                                                                                                                                                                                                                                                                                                                                                                                                                                                                                                                                                                                                                                                                                                                                                                                                                                                                                                                                                                                                                                                                                                                                                                                                                                                                                                                                                                                                                                                                                                                                                                                                                                                                                                                                                                                                                                                                                                                                                                                                                                                                                                                                                                                                                                                                                                                                                                                                                                                                                                                                                                                            |   |   |   |   |   |   |  |  |  |  |  |  |   |   |   |   |   |   |  |  |  |  |  |  |   |   |   |   |   |   |  |  |  |  |  |  |   |   |   |   |  |  |  |  |  |         |    |     |                        |                          |                          |                          |                 |                          |                          |                          |                                      |                          |                          |                          |   |   |   |   |   |   |  |  |  |  |  |  |   |   |   |   |  |  |  |  |                     |                          |                     |                          |                                     |                          |                                |                          |                                         |                          |                            |                          |                                              |                          |            |                          |
| c) In other facility before referral                                                                                                                                                                                                                                                                                                                                                                                                                                                                                                                                                                                                                                                                                                                                                                                                                                                                                                                                                                                                                                                                                                                                                                                                                                                                                                                                                                                                                                                                                                                                                                                                                                                                                                                                                                                                                                                                                                                                                                                                                                                                                                                                                                                                                                                                                                                                                                                                                                                                                                                                                                                                                                                                                                                                                                                                                                                                                                                                                                                                                                                                                                                                                                                                                                                                                                                                                                                                                                                                                                                                                                                                                                                                                                                                                                                                                                                                                                                                                                                                                                                                                                                                                                                                                                                                                                                                                                                                                                                                                                                                                                                                                                                                                                                                                                                                                                                                                                                                                                                                                                                                                                                                                                                                                                                                                                                                                                                                                                                                                                                                                                                                                                      | <input type="checkbox"/>                                                                                                                                                                                                                                             | <input type="checkbox"/>                                                                                                                  | <input type="checkbox"/> |   |   |   |  |  |  |  |  |  |  |         |    |     |                                                  |                          |                          |                          |                               |                          |                          |                          |                      |                          |                          |                          |               |                          |                          |                          |            |                          |                          |                          |                       |                          |                          |                          |                      |                          |                          |                          |             |                          |                          |                          |                                      |                          |                          |                          |                            |                          |                          |                          |            |                          |                          |                          |                    |                          |                          |                          |  |         |    |     |                |                          |                          |                          |                |                          |                          |                          |               |                          |                          |                          |                  |                          |                          |                          |                                                                                                                                                                                                                                                                                                                                                                                                                                                                                                                                                                                                                                                                                                                                                                                                                                                                                                                                                                                                                                                                                                                                                                                                                                                                                                                                                                                                                                                                                                                                                                                                                                                                                                                                                                                                                                                                                                                                                                                                                                                                                                                                                                                                                                                                                                                                                                                                                                                                                                                                                                                                                                                                                                                                                                                                                                                                                                                                                                                                                                                                                                                                                                                                                                                                                                                                                                                                                                                                                                                                                                                                                                                                                                                                                                                                                                                                                                                                                                                                                                                                                                                                                                                                                                                                                                                                                                                                                                                                                                                                                                                                                                                                                                                            |   |   |   |   |   |   |  |  |  |  |  |  |   |   |   |   |   |   |  |  |  |  |  |  |   |   |   |   |   |   |  |  |  |  |  |  |   |   |   |   |  |  |  |  |  |         |    |     |                        |                          |                          |                          |                 |                          |                          |                          |                                      |                          |                          |                          |   |   |   |   |   |   |  |  |  |  |  |  |   |   |   |   |  |  |  |  |                     |                          |                     |                          |                                     |                          |                                |                          |                                         |                          |                            |                          |                                              |                          |            |                          |
| d                                                                                                                                                                                                                                                                                                                                                                                                                                                                                                                                                                                                                                                                                                                                                                                                                                                                                                                                                                                                                                                                                                                                                                                                                                                                                                                                                                                                                                                                                                                                                                                                                                                                                                                                                                                                                                                                                                                                                                                                                                                                                                                                                                                                                                                                                                                                                                                                                                                                                                                                                                                                                                                                                                                                                                                                                                                                                                                                                                                                                                                                                                                                                                                                                                                                                                                                                                                                                                                                                                                                                                                                                                                                                                                                                                                                                                                                                                                                                                                                                                                                                                                                                                                                                                                                                                                                                                                                                                                                                                                                                                                                                                                                                                                                                                                                                                                                                                                                                                                                                                                                                                                                                                                                                                                                                                                                                                                                                                                                                                                                                                                                                                                                         | d                                                                                                                                                                                                                                                                    | m                                                                                                                                         | m                        | y | y |   |  |  |  |  |  |  |  |         |    |     |                                                  |                          |                          |                          |                               |                          |                          |                          |                      |                          |                          |                          |               |                          |                          |                          |            |                          |                          |                          |                       |                          |                          |                          |                      |                          |                          |                          |             |                          |                          |                          |                                      |                          |                          |                          |                            |                          |                          |                          |            |                          |                          |                          |                    |                          |                          |                          |  |         |    |     |                |                          |                          |                          |                |                          |                          |                          |               |                          |                          |                          |                  |                          |                          |                          |                                                                                                                                                                                                                                                                                                                                                                                                                                                                                                                                                                                                                                                                                                                                                                                                                                                                                                                                                                                                                                                                                                                                                                                                                                                                                                                                                                                                                                                                                                                                                                                                                                                                                                                                                                                                                                                                                                                                                                                                                                                                                                                                                                                                                                                                                                                                                                                                                                                                                                                                                                                                                                                                                                                                                                                                                                                                                                                                                                                                                                                                                                                                                                                                                                                                                                                                                                                                                                                                                                                                                                                                                                                                                                                                                                                                                                                                                                                                                                                                                                                                                                                                                                                                                                                                                                                                                                                                                                                                                                                                                                                                                                                                                                                            |   |   |   |   |   |   |  |  |  |  |  |  |   |   |   |   |   |   |  |  |  |  |  |  |   |   |   |   |   |   |  |  |  |  |  |  |   |   |   |   |  |  |  |  |  |         |    |     |                        |                          |                          |                          |                 |                          |                          |                          |                                      |                          |                          |                          |   |   |   |   |   |   |  |  |  |  |  |  |   |   |   |   |  |  |  |  |                     |                          |                     |                          |                                     |                          |                                |                          |                                         |                          |                            |                          |                                              |                          |            |                          |
|                                                                                                                                                                                                                                                                                                                                                                                                                                                                                                                                                                                                                                                                                                                                                                                                                                                                                                                                                                                                                                                                                                                                                                                                                                                                                                                                                                                                                                                                                                                                                                                                                                                                                                                                                                                                                                                                                                                                                                                                                                                                                                                                                                                                                                                                                                                                                                                                                                                                                                                                                                                                                                                                                                                                                                                                                                                                                                                                                                                                                                                                                                                                                                                                                                                                                                                                                                                                                                                                                                                                                                                                                                                                                                                                                                                                                                                                                                                                                                                                                                                                                                                                                                                                                                                                                                                                                                                                                                                                                                                                                                                                                                                                                                                                                                                                                                                                                                                                                                                                                                                                                                                                                                                                                                                                                                                                                                                                                                                                                                                                                                                                                                                                           |                                                                                                                                                                                                                                                                      |                                                                                                                                           |                          |   |   |   |  |  |  |  |  |  |  |         |    |     |                                                  |                          |                          |                          |                               |                          |                          |                          |                      |                          |                          |                          |               |                          |                          |                          |            |                          |                          |                          |                       |                          |                          |                          |                      |                          |                          |                          |             |                          |                          |                          |                                      |                          |                          |                          |                            |                          |                          |                          |            |                          |                          |                          |                    |                          |                          |                          |  |         |    |     |                |                          |                          |                          |                |                          |                          |                          |               |                          |                          |                          |                  |                          |                          |                          |                                                                                                                                                                                                                                                                                                                                                                                                                                                                                                                                                                                                                                                                                                                                                                                                                                                                                                                                                                                                                                                                                                                                                                                                                                                                                                                                                                                                                                                                                                                                                                                                                                                                                                                                                                                                                                                                                                                                                                                                                                                                                                                                                                                                                                                                                                                                                                                                                                                                                                                                                                                                                                                                                                                                                                                                                                                                                                                                                                                                                                                                                                                                                                                                                                                                                                                                                                                                                                                                                                                                                                                                                                                                                                                                                                                                                                                                                                                                                                                                                                                                                                                                                                                                                                                                                                                                                                                                                                                                                                                                                                                                                                                                                                                            |   |   |   |   |   |   |  |  |  |  |  |  |   |   |   |   |   |   |  |  |  |  |  |  |   |   |   |   |   |   |  |  |  |  |  |  |   |   |   |   |  |  |  |  |  |         |    |     |                        |                          |                          |                          |                 |                          |                          |                          |                                      |                          |                          |                          |   |   |   |   |   |   |  |  |  |  |  |  |   |   |   |   |  |  |  |  |                     |                          |                     |                          |                                     |                          |                                |                          |                                         |                          |                            |                          |                                              |                          |            |                          |
| h                                                                                                                                                                                                                                                                                                                                                                                                                                                                                                                                                                                                                                                                                                                                                                                                                                                                                                                                                                                                                                                                                                                                                                                                                                                                                                                                                                                                                                                                                                                                                                                                                                                                                                                                                                                                                                                                                                                                                                                                                                                                                                                                                                                                                                                                                                                                                                                                                                                                                                                                                                                                                                                                                                                                                                                                                                                                                                                                                                                                                                                                                                                                                                                                                                                                                                                                                                                                                                                                                                                                                                                                                                                                                                                                                                                                                                                                                                                                                                                                                                                                                                                                                                                                                                                                                                                                                                                                                                                                                                                                                                                                                                                                                                                                                                                                                                                                                                                                                                                                                                                                                                                                                                                                                                                                                                                                                                                                                                                                                                                                                                                                                                                                         | h                                                                                                                                                                                                                                                                    | m                                                                                                                                         | m                        |   |   |   |  |  |  |  |  |  |  |         |    |     |                                                  |                          |                          |                          |                               |                          |                          |                          |                      |                          |                          |                          |               |                          |                          |                          |            |                          |                          |                          |                       |                          |                          |                          |                      |                          |                          |                          |             |                          |                          |                          |                                      |                          |                          |                          |                            |                          |                          |                          |            |                          |                          |                          |                    |                          |                          |                          |  |         |    |     |                |                          |                          |                          |                |                          |                          |                          |               |                          |                          |                          |                  |                          |                          |                          |                                                                                                                                                                                                                                                                                                                                                                                                                                                                                                                                                                                                                                                                                                                                                                                                                                                                                                                                                                                                                                                                                                                                                                                                                                                                                                                                                                                                                                                                                                                                                                                                                                                                                                                                                                                                                                                                                                                                                                                                                                                                                                                                                                                                                                                                                                                                                                                                                                                                                                                                                                                                                                                                                                                                                                                                                                                                                                                                                                                                                                                                                                                                                                                                                                                                                                                                                                                                                                                                                                                                                                                                                                                                                                                                                                                                                                                                                                                                                                                                                                                                                                                                                                                                                                                                                                                                                                                                                                                                                                                                                                                                                                                                                                                            |   |   |   |   |   |   |  |  |  |  |  |  |   |   |   |   |   |   |  |  |  |  |  |  |   |   |   |   |   |   |  |  |  |  |  |  |   |   |   |   |  |  |  |  |  |         |    |     |                        |                          |                          |                          |                 |                          |                          |                          |                                      |                          |                          |                          |   |   |   |   |   |   |  |  |  |  |  |  |   |   |   |   |  |  |  |  |                     |                          |                     |                          |                                     |                          |                                |                          |                                         |                          |                            |                          |                                              |                          |            |                          |
|                                                                                                                                                                                                                                                                                                                                                                                                                                                                                                                                                                                                                                                                                                                                                                                                                                                                                                                                                                                                                                                                                                                                                                                                                                                                                                                                                                                                                                                                                                                                                                                                                                                                                                                                                                                                                                                                                                                                                                                                                                                                                                                                                                                                                                                                                                                                                                                                                                                                                                                                                                                                                                                                                                                                                                                                                                                                                                                                                                                                                                                                                                                                                                                                                                                                                                                                                                                                                                                                                                                                                                                                                                                                                                                                                                                                                                                                                                                                                                                                                                                                                                                                                                                                                                                                                                                                                                                                                                                                                                                                                                                                                                                                                                                                                                                                                                                                                                                                                                                                                                                                                                                                                                                                                                                                                                                                                                                                                                                                                                                                                                                                                                                                           |                                                                                                                                                                                                                                                                      |                                                                                                                                           |                          |   |   |   |  |  |  |  |  |  |  |         |    |     |                                                  |                          |                          |                          |                               |                          |                          |                          |                      |                          |                          |                          |               |                          |                          |                          |            |                          |                          |                          |                       |                          |                          |                          |                      |                          |                          |                          |             |                          |                          |                          |                                      |                          |                          |                          |                            |                          |                          |                          |            |                          |                          |                          |                    |                          |                          |                          |  |         |    |     |                |                          |                          |                          |                |                          |                          |                          |               |                          |                          |                          |                  |                          |                          |                          |                                                                                                                                                                                                                                                                                                                                                                                                                                                                                                                                                                                                                                                                                                                                                                                                                                                                                                                                                                                                                                                                                                                                                                                                                                                                                                                                                                                                                                                                                                                                                                                                                                                                                                                                                                                                                                                                                                                                                                                                                                                                                                                                                                                                                                                                                                                                                                                                                                                                                                                                                                                                                                                                                                                                                                                                                                                                                                                                                                                                                                                                                                                                                                                                                                                                                                                                                                                                                                                                                                                                                                                                                                                                                                                                                                                                                                                                                                                                                                                                                                                                                                                                                                                                                                                                                                                                                                                                                                                                                                                                                                                                                                                                                                                            |   |   |   |   |   |   |  |  |  |  |  |  |   |   |   |   |   |   |  |  |  |  |  |  |   |   |   |   |   |   |  |  |  |  |  |  |   |   |   |   |  |  |  |  |  |         |    |     |                        |                          |                          |                          |                 |                          |                          |                          |                                      |                          |                          |                          |   |   |   |   |   |   |  |  |  |  |  |  |   |   |   |   |  |  |  |  |                     |                          |                     |                          |                                     |                          |                                |                          |                                         |                          |                            |                          |                                              |                          |            |                          |
| a) Public transport                                                                                                                                                                                                                                                                                                                                                                                                                                                                                                                                                                                                                                                                                                                                                                                                                                                                                                                                                                                                                                                                                                                                                                                                                                                                                                                                                                                                                                                                                                                                                                                                                                                                                                                                                                                                                                                                                                                                                                                                                                                                                                                                                                                                                                                                                                                                                                                                                                                                                                                                                                                                                                                                                                                                                                                                                                                                                                                                                                                                                                                                                                                                                                                                                                                                                                                                                                                                                                                                                                                                                                                                                                                                                                                                                                                                                                                                                                                                                                                                                                                                                                                                                                                                                                                                                                                                                                                                                                                                                                                                                                                                                                                                                                                                                                                                                                                                                                                                                                                                                                                                                                                                                                                                                                                                                                                                                                                                                                                                                                                                                                                                                                                       | <input type="checkbox"/>                                                                                                                                                                                                                                             |                                                                                                                                           |                          |   |   |   |  |  |  |  |  |  |  |         |    |     |                                                  |                          |                          |                          |                               |                          |                          |                          |                      |                          |                          |                          |               |                          |                          |                          |            |                          |                          |                          |                       |                          |                          |                          |                      |                          |                          |                          |             |                          |                          |                          |                                      |                          |                          |                          |                            |                          |                          |                          |            |                          |                          |                          |                    |                          |                          |                          |  |         |    |     |                |                          |                          |                          |                |                          |                          |                          |               |                          |                          |                          |                  |                          |                          |                          |                                                                                                                                                                                                                                                                                                                                                                                                                                                                                                                                                                                                                                                                                                                                                                                                                                                                                                                                                                                                                                                                                                                                                                                                                                                                                                                                                                                                                                                                                                                                                                                                                                                                                                                                                                                                                                                                                                                                                                                                                                                                                                                                                                                                                                                                                                                                                                                                                                                                                                                                                                                                                                                                                                                                                                                                                                                                                                                                                                                                                                                                                                                                                                                                                                                                                                                                                                                                                                                                                                                                                                                                                                                                                                                                                                                                                                                                                                                                                                                                                                                                                                                                                                                                                                                                                                                                                                                                                                                                                                                                                                                                                                                                                                                            |   |   |   |   |   |   |  |  |  |  |  |  |   |   |   |   |   |   |  |  |  |  |  |  |   |   |   |   |   |   |  |  |  |  |  |  |   |   |   |   |  |  |  |  |  |         |    |     |                        |                          |                          |                          |                 |                          |                          |                          |                                      |                          |                          |                          |   |   |   |   |   |   |  |  |  |  |  |  |   |   |   |   |  |  |  |  |                     |                          |                     |                          |                                     |                          |                                |                          |                                         |                          |                            |                          |                                              |                          |            |                          |
| b) Family transport                                                                                                                                                                                                                                                                                                                                                                                                                                                                                                                                                                                                                                                                                                                                                                                                                                                                                                                                                                                                                                                                                                                                                                                                                                                                                                                                                                                                                                                                                                                                                                                                                                                                                                                                                                                                                                                                                                                                                                                                                                                                                                                                                                                                                                                                                                                                                                                                                                                                                                                                                                                                                                                                                                                                                                                                                                                                                                                                                                                                                                                                                                                                                                                                                                                                                                                                                                                                                                                                                                                                                                                                                                                                                                                                                                                                                                                                                                                                                                                                                                                                                                                                                                                                                                                                                                                                                                                                                                                                                                                                                                                                                                                                                                                                                                                                                                                                                                                                                                                                                                                                                                                                                                                                                                                                                                                                                                                                                                                                                                                                                                                                                                                       | <input type="checkbox"/>                                                                                                                                                                                                                                             |                                                                                                                                           |                          |   |   |   |  |  |  |  |  |  |  |         |    |     |                                                  |                          |                          |                          |                               |                          |                          |                          |                      |                          |                          |                          |               |                          |                          |                          |            |                          |                          |                          |                       |                          |                          |                          |                      |                          |                          |                          |             |                          |                          |                          |                                      |                          |                          |                          |                            |                          |                          |                          |            |                          |                          |                          |                    |                          |                          |                          |  |         |    |     |                |                          |                          |                          |                |                          |                          |                          |               |                          |                          |                          |                  |                          |                          |                          |                                                                                                                                                                                                                                                                                                                                                                                                                                                                                                                                                                                                                                                                                                                                                                                                                                                                                                                                                                                                                                                                                                                                                                                                                                                                                                                                                                                                                                                                                                                                                                                                                                                                                                                                                                                                                                                                                                                                                                                                                                                                                                                                                                                                                                                                                                                                                                                                                                                                                                                                                                                                                                                                                                                                                                                                                                                                                                                                                                                                                                                                                                                                                                                                                                                                                                                                                                                                                                                                                                                                                                                                                                                                                                                                                                                                                                                                                                                                                                                                                                                                                                                                                                                                                                                                                                                                                                                                                                                                                                                                                                                                                                                                                                                            |   |   |   |   |   |   |  |  |  |  |  |  |   |   |   |   |   |   |  |  |  |  |  |  |   |   |   |   |   |   |  |  |  |  |  |  |   |   |   |   |  |  |  |  |  |         |    |     |                        |                          |                          |                          |                 |                          |                          |                          |                                      |                          |                          |                          |   |   |   |   |   |   |  |  |  |  |  |  |   |   |   |   |  |  |  |  |                     |                          |                     |                          |                                     |                          |                                |                          |                                         |                          |                            |                          |                                              |                          |            |                          |
| c) Non-medicalised formal transport                                                                                                                                                                                                                                                                                                                                                                                                                                                                                                                                                                                                                                                                                                                                                                                                                                                                                                                                                                                                                                                                                                                                                                                                                                                                                                                                                                                                                                                                                                                                                                                                                                                                                                                                                                                                                                                                                                                                                                                                                                                                                                                                                                                                                                                                                                                                                                                                                                                                                                                                                                                                                                                                                                                                                                                                                                                                                                                                                                                                                                                                                                                                                                                                                                                                                                                                                                                                                                                                                                                                                                                                                                                                                                                                                                                                                                                                                                                                                                                                                                                                                                                                                                                                                                                                                                                                                                                                                                                                                                                                                                                                                                                                                                                                                                                                                                                                                                                                                                                                                                                                                                                                                                                                                                                                                                                                                                                                                                                                                                                                                                                                                                       | <input type="checkbox"/>                                                                                                                                                                                                                                             |                                                                                                                                           |                          |   |   |   |  |  |  |  |  |  |  |         |    |     |                                                  |                          |                          |                          |                               |                          |                          |                          |                      |                          |                          |                          |               |                          |                          |                          |            |                          |                          |                          |                       |                          |                          |                          |                      |                          |                          |                          |             |                          |                          |                          |                                      |                          |                          |                          |                            |                          |                          |                          |            |                          |                          |                          |                    |                          |                          |                          |  |         |    |     |                |                          |                          |                          |                |                          |                          |                          |               |                          |                          |                          |                  |                          |                          |                          |                                                                                                                                                                                                                                                                                                                                                                                                                                                                                                                                                                                                                                                                                                                                                                                                                                                                                                                                                                                                                                                                                                                                                                                                                                                                                                                                                                                                                                                                                                                                                                                                                                                                                                                                                                                                                                                                                                                                                                                                                                                                                                                                                                                                                                                                                                                                                                                                                                                                                                                                                                                                                                                                                                                                                                                                                                                                                                                                                                                                                                                                                                                                                                                                                                                                                                                                                                                                                                                                                                                                                                                                                                                                                                                                                                                                                                                                                                                                                                                                                                                                                                                                                                                                                                                                                                                                                                                                                                                                                                                                                                                                                                                                                                                            |   |   |   |   |   |   |  |  |  |  |  |  |   |   |   |   |   |   |  |  |  |  |  |  |   |   |   |   |   |   |  |  |  |  |  |  |   |   |   |   |  |  |  |  |  |         |    |     |                        |                          |                          |                          |                 |                          |                          |                          |                                      |                          |                          |                          |   |   |   |   |   |   |  |  |  |  |  |  |   |   |   |   |  |  |  |  |                     |                          |                     |                          |                                     |                          |                                |                          |                                         |                          |                            |                          |                                              |                          |            |                          |
| d) Ambulance with the facility                                                                                                                                                                                                                                                                                                                                                                                                                                                                                                                                                                                                                                                                                                                                                                                                                                                                                                                                                                                                                                                                                                                                                                                                                                                                                                                                                                                                                                                                                                                                                                                                                                                                                                                                                                                                                                                                                                                                                                                                                                                                                                                                                                                                                                                                                                                                                                                                                                                                                                                                                                                                                                                                                                                                                                                                                                                                                                                                                                                                                                                                                                                                                                                                                                                                                                                                                                                                                                                                                                                                                                                                                                                                                                                                                                                                                                                                                                                                                                                                                                                                                                                                                                                                                                                                                                                                                                                                                                                                                                                                                                                                                                                                                                                                                                                                                                                                                                                                                                                                                                                                                                                                                                                                                                                                                                                                                                                                                                                                                                                                                                                                                                            | <input type="checkbox"/>                                                                                                                                                                                                                                             |                                                                                                                                           |                          |   |   |   |  |  |  |  |  |  |  |         |    |     |                                                  |                          |                          |                          |                               |                          |                          |                          |                      |                          |                          |                          |               |                          |                          |                          |            |                          |                          |                          |                       |                          |                          |                          |                      |                          |                          |                          |             |                          |                          |                          |                                      |                          |                          |                          |                            |                          |                          |                          |            |                          |                          |                          |                    |                          |                          |                          |  |         |    |     |                |                          |                          |                          |                |                          |                          |                          |               |                          |                          |                          |                  |                          |                          |                          |                                                                                                                                                                                                                                                                                                                                                                                                                                                                                                                                                                                                                                                                                                                                                                                                                                                                                                                                                                                                                                                                                                                                                                                                                                                                                                                                                                                                                                                                                                                                                                                                                                                                                                                                                                                                                                                                                                                                                                                                                                                                                                                                                                                                                                                                                                                                                                                                                                                                                                                                                                                                                                                                                                                                                                                                                                                                                                                                                                                                                                                                                                                                                                                                                                                                                                                                                                                                                                                                                                                                                                                                                                                                                                                                                                                                                                                                                                                                                                                                                                                                                                                                                                                                                                                                                                                                                                                                                                                                                                                                                                                                                                                                                                                            |   |   |   |   |   |   |  |  |  |  |  |  |   |   |   |   |   |   |  |  |  |  |  |  |   |   |   |   |   |   |  |  |  |  |  |  |   |   |   |   |  |  |  |  |  |         |    |     |                        |                          |                          |                          |                 |                          |                          |                          |                                      |                          |                          |                          |   |   |   |   |   |   |  |  |  |  |  |  |   |   |   |   |  |  |  |  |                     |                          |                     |                          |                                     |                          |                                |                          |                                         |                          |                            |                          |                                              |                          |            |                          |
| e) Ambulance called from other facility                                                                                                                                                                                                                                                                                                                                                                                                                                                                                                                                                                                                                                                                                                                                                                                                                                                                                                                                                                                                                                                                                                                                                                                                                                                                                                                                                                                                                                                                                                                                                                                                                                                                                                                                                                                                                                                                                                                                                                                                                                                                                                                                                                                                                                                                                                                                                                                                                                                                                                                                                                                                                                                                                                                                                                                                                                                                                                                                                                                                                                                                                                                                                                                                                                                                                                                                                                                                                                                                                                                                                                                                                                                                                                                                                                                                                                                                                                                                                                                                                                                                                                                                                                                                                                                                                                                                                                                                                                                                                                                                                                                                                                                                                                                                                                                                                                                                                                                                                                                                                                                                                                                                                                                                                                                                                                                                                                                                                                                                                                                                                                                                                                   | <input type="checkbox"/>                                                                                                                                                                                                                                             |                                                                                                                                           |                          |   |   |   |  |  |  |  |  |  |  |         |    |     |                                                  |                          |                          |                          |                               |                          |                          |                          |                      |                          |                          |                          |               |                          |                          |                          |            |                          |                          |                          |                       |                          |                          |                          |                      |                          |                          |                          |             |                          |                          |                          |                                      |                          |                          |                          |                            |                          |                          |                          |            |                          |                          |                          |                    |                          |                          |                          |  |         |    |     |                |                          |                          |                          |                |                          |                          |                          |               |                          |                          |                          |                  |                          |                          |                          |                                                                                                                                                                                                                                                                                                                                                                                                                                                                                                                                                                                                                                                                                                                                                                                                                                                                                                                                                                                                                                                                                                                                                                                                                                                                                                                                                                                                                                                                                                                                                                                                                                                                                                                                                                                                                                                                                                                                                                                                                                                                                                                                                                                                                                                                                                                                                                                                                                                                                                                                                                                                                                                                                                                                                                                                                                                                                                                                                                                                                                                                                                                                                                                                                                                                                                                                                                                                                                                                                                                                                                                                                                                                                                                                                                                                                                                                                                                                                                                                                                                                                                                                                                                                                                                                                                                                                                                                                                                                                                                                                                                                                                                                                                                            |   |   |   |   |   |   |  |  |  |  |  |  |   |   |   |   |   |   |  |  |  |  |  |  |   |   |   |   |   |   |  |  |  |  |  |  |   |   |   |   |  |  |  |  |  |         |    |     |                        |                          |                          |                          |                 |                          |                          |                          |                                      |                          |                          |                          |   |   |   |   |   |   |  |  |  |  |  |  |   |   |   |   |  |  |  |  |                     |                          |                     |                          |                                     |                          |                                |                          |                                         |                          |                            |                          |                                              |                          |            |                          |
| f) Other ambulance service                                                                                                                                                                                                                                                                                                                                                                                                                                                                                                                                                                                                                                                                                                                                                                                                                                                                                                                                                                                                                                                                                                                                                                                                                                                                                                                                                                                                                                                                                                                                                                                                                                                                                                                                                                                                                                                                                                                                                                                                                                                                                                                                                                                                                                                                                                                                                                                                                                                                                                                                                                                                                                                                                                                                                                                                                                                                                                                                                                                                                                                                                                                                                                                                                                                                                                                                                                                                                                                                                                                                                                                                                                                                                                                                                                                                                                                                                                                                                                                                                                                                                                                                                                                                                                                                                                                                                                                                                                                                                                                                                                                                                                                                                                                                                                                                                                                                                                                                                                                                                                                                                                                                                                                                                                                                                                                                                                                                                                                                                                                                                                                                                                                | <input type="checkbox"/>                                                                                                                                                                                                                                             |                                                                                                                                           |                          |   |   |   |  |  |  |  |  |  |  |         |    |     |                                                  |                          |                          |                          |                               |                          |                          |                          |                      |                          |                          |                          |               |                          |                          |                          |            |                          |                          |                          |                       |                          |                          |                          |                      |                          |                          |                          |             |                          |                          |                          |                                      |                          |                          |                          |                            |                          |                          |                          |            |                          |                          |                          |                    |                          |                          |                          |  |         |    |     |                |                          |                          |                          |                |                          |                          |                          |               |                          |                          |                          |                  |                          |                          |                          |                                                                                                                                                                                                                                                                                                                                                                                                                                                                                                                                                                                                                                                                                                                                                                                                                                                                                                                                                                                                                                                                                                                                                                                                                                                                                                                                                                                                                                                                                                                                                                                                                                                                                                                                                                                                                                                                                                                                                                                                                                                                                                                                                                                                                                                                                                                                                                                                                                                                                                                                                                                                                                                                                                                                                                                                                                                                                                                                                                                                                                                                                                                                                                                                                                                                                                                                                                                                                                                                                                                                                                                                                                                                                                                                                                                                                                                                                                                                                                                                                                                                                                                                                                                                                                                                                                                                                                                                                                                                                                                                                                                                                                                                                                                            |   |   |   |   |   |   |  |  |  |  |  |  |   |   |   |   |   |   |  |  |  |  |  |  |   |   |   |   |   |   |  |  |  |  |  |  |   |   |   |   |  |  |  |  |  |         |    |     |                        |                          |                          |                          |                 |                          |                          |                          |                                      |                          |                          |                          |   |   |   |   |   |   |  |  |  |  |  |  |   |   |   |   |  |  |  |  |                     |                          |                     |                          |                                     |                          |                                |                          |                                         |                          |                            |                          |                                              |                          |            |                          |
| g) A private or commercial transport vehicle                                                                                                                                                                                                                                                                                                                                                                                                                                                                                                                                                                                                                                                                                                                                                                                                                                                                                                                                                                                                                                                                                                                                                                                                                                                                                                                                                                                                                                                                                                                                                                                                                                                                                                                                                                                                                                                                                                                                                                                                                                                                                                                                                                                                                                                                                                                                                                                                                                                                                                                                                                                                                                                                                                                                                                                                                                                                                                                                                                                                                                                                                                                                                                                                                                                                                                                                                                                                                                                                                                                                                                                                                                                                                                                                                                                                                                                                                                                                                                                                                                                                                                                                                                                                                                                                                                                                                                                                                                                                                                                                                                                                                                                                                                                                                                                                                                                                                                                                                                                                                                                                                                                                                                                                                                                                                                                                                                                                                                                                                                                                                                                                                              | <input type="checkbox"/>                                                                                                                                                                                                                                             |                                                                                                                                           |                          |   |   |   |  |  |  |  |  |  |  |         |    |     |                                                  |                          |                          |                          |                               |                          |                          |                          |                      |                          |                          |                          |               |                          |                          |                          |            |                          |                          |                          |                       |                          |                          |                          |                      |                          |                          |                          |             |                          |                          |                          |                                      |                          |                          |                          |                            |                          |                          |                          |            |                          |                          |                          |                    |                          |                          |                          |  |         |    |     |                |                          |                          |                          |                |                          |                          |                          |               |                          |                          |                          |                  |                          |                          |                          |                                                                                                                                                                                                                                                                                                                                                                                                                                                                                                                                                                                                                                                                                                                                                                                                                                                                                                                                                                                                                                                                                                                                                                                                                                                                                                                                                                                                                                                                                                                                                                                                                                                                                                                                                                                                                                                                                                                                                                                                                                                                                                                                                                                                                                                                                                                                                                                                                                                                                                                                                                                                                                                                                                                                                                                                                                                                                                                                                                                                                                                                                                                                                                                                                                                                                                                                                                                                                                                                                                                                                                                                                                                                                                                                                                                                                                                                                                                                                                                                                                                                                                                                                                                                                                                                                                                                                                                                                                                                                                                                                                                                                                                                                                                            |   |   |   |   |   |   |  |  |  |  |  |  |   |   |   |   |   |   |  |  |  |  |  |  |   |   |   |   |   |   |  |  |  |  |  |  |   |   |   |   |  |  |  |  |  |         |    |     |                        |                          |                          |                          |                 |                          |                          |                          |                                      |                          |                          |                          |   |   |   |   |   |   |  |  |  |  |  |  |   |   |   |   |  |  |  |  |                     |                          |                     |                          |                                     |                          |                                |                          |                                         |                          |                            |                          |                                              |                          |            |                          |
| h) Unknown                                                                                                                                                                                                                                                                                                                                                                                                                                                                                                                                                                                                                                                                                                                                                                                                                                                                                                                                                                                                                                                                                                                                                                                                                                                                                                                                                                                                                                                                                                                                                                                                                                                                                                                                                                                                                                                                                                                                                                                                                                                                                                                                                                                                                                                                                                                                                                                                                                                                                                                                                                                                                                                                                                                                                                                                                                                                                                                                                                                                                                                                                                                                                                                                                                                                                                                                                                                                                                                                                                                                                                                                                                                                                                                                                                                                                                                                                                                                                                                                                                                                                                                                                                                                                                                                                                                                                                                                                                                                                                                                                                                                                                                                                                                                                                                                                                                                                                                                                                                                                                                                                                                                                                                                                                                                                                                                                                                                                                                                                                                                                                                                                                                                | <input type="checkbox"/>                                                                                                                                                                                                                                             |                                                                                                                                           |                          |   |   |   |  |  |  |  |  |  |  |         |    |     |                                                  |                          |                          |                          |                               |                          |                          |                          |                      |                          |                          |                          |               |                          |                          |                          |            |                          |                          |                          |                       |                          |                          |                          |                      |                          |                          |                          |             |                          |                          |                          |                                      |                          |                          |                          |                            |                          |                          |                          |            |                          |                          |                          |                    |                          |                          |                          |  |         |    |     |                |                          |                          |                          |                |                          |                          |                          |               |                          |                          |                          |                  |                          |                          |                          |                                                                                                                                                                                                                                                                                                                                                                                                                                                                                                                                                                                                                                                                                                                                                                                                                                                                                                                                                                                                                                                                                                                                                                                                                                                                                                                                                                                                                                                                                                                                                                                                                                                                                                                                                                                                                                                                                                                                                                                                                                                                                                                                                                                                                                                                                                                                                                                                                                                                                                                                                                                                                                                                                                                                                                                                                                                                                                                                                                                                                                                                                                                                                                                                                                                                                                                                                                                                                                                                                                                                                                                                                                                                                                                                                                                                                                                                                                                                                                                                                                                                                                                                                                                                                                                                                                                                                                                                                                                                                                                                                                                                                                                                                                                            |   |   |   |   |   |   |  |  |  |  |  |  |   |   |   |   |   |   |  |  |  |  |  |  |   |   |   |   |   |   |  |  |  |  |  |  |   |   |   |   |  |  |  |  |  |         |    |     |                        |                          |                          |                          |                 |                          |                          |                          |                                      |                          |                          |                          |   |   |   |   |   |   |  |  |  |  |  |  |   |   |   |   |  |  |  |  |                     |                          |                     |                          |                                     |                          |                                |                          |                                         |                          |                            |                          |                                              |                          |            |                          |

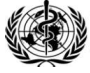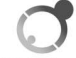

- 10) Diagnosis at admission to this facility
- |                                                                                    |                          |                          |
|------------------------------------------------------------------------------------|--------------------------|--------------------------|
|                                                                                    | No                       | Yes                      |
| a) Placentation abnormality<br><i>(praevia/accreta/increta/percreta/abruption)</i> | <input type="checkbox"/> | <input type="checkbox"/> |
| b) Antenatal haemorrhage                                                           | <input type="checkbox"/> | <input type="checkbox"/> |
| c) Pre-eclampsia                                                                   | <input type="checkbox"/> | <input type="checkbox"/> |
| d) Eclampsia/HELLP syndrome                                                        | <input type="checkbox"/> | <input type="checkbox"/> |
| e) Gestational diabetes                                                            | <input type="checkbox"/> | <input type="checkbox"/> |
| f) Preterm labour                                                                  | <input type="checkbox"/> | <input type="checkbox"/> |
| g) Prelabour rupture of membranes                                                  | <input type="checkbox"/> | <input type="checkbox"/> |
| h) Abortion/miscarriage                                                            | <input type="checkbox"/> | <input type="checkbox"/> |
| i) Postpartum/postabortion haemorrhage                                             | <input type="checkbox"/> | <input type="checkbox"/> |
| j) Infection                                                                       | <input type="checkbox"/> | <input type="checkbox"/> |
| k) Labour                                                                          | <input type="checkbox"/> | <input type="checkbox"/> |
| l) Chronic disease                                                                 | <input type="checkbox"/> | <input type="checkbox"/> |
| m) External injury in pregnancy                                                    | <input type="checkbox"/> | <input type="checkbox"/> |
| n) Unknown diagnosis                                                               | <input type="checkbox"/> | <input type="checkbox"/> |
| m) Other pregnancy complications                                                   | <input type="checkbox"/> | <input type="checkbox"/> |
| m.1) If other, specify:                                                            |                          |                          |

- e) Physician who can perform caesarean section
- f) Critical care specialist
- g) Anaesthesiologist
- h) Anaesthetist (nurse/ paramedics)
- i) Infectious disease specialist
- j) Paediatrician

- 15) Was a decision taken to relocate the woman in the after suspicion/diagnosis of infection ?
- Not available No Yes
- a) Admit to ICU

a.1) If yes, date and time the decision was taken for the first time:

|   |   |   |   |   |   |   |   |   |   |
|---|---|---|---|---|---|---|---|---|---|
| d | d | m | m | y | y | h | h | m | m |
|   |   |   |   |   |   |   |   |   |   |

*(unknown=99/99/99) (00:00-23:59 hrs)*

- b) Admit to high dependency care unit/bed

b.1) If yes, date and time the decision was taken for the first time:

|   |   |   |   |   |   |   |   |   |   |
|---|---|---|---|---|---|---|---|---|---|
| d | d | m | m | y | y | h | h | m | m |
|   |   |   |   |   |   |   |   |   |   |

- c) Theatre

c.1) If yes, date and time the decision was taken for the first time:

|   |   |   |   |   |   |   |   |   |   |
|---|---|---|---|---|---|---|---|---|---|
| d | d | m | m | y | y | h | h | m | m |
|   |   |   |   |   |   |   |   |   |   |

- d) Transfer to higher level facility

d.1) If yes, date and time the decision was taken for the first time:

|   |   |   |   |   |   |   |   |   |   |
|---|---|---|---|---|---|---|---|---|---|
| d | d | m | m | y | y | h | h | m | m |
|   |   |   |   |   |   |   |   |   |   |

C) CARE AFTER SUSPICION/DIAGNOSIS OF INFECTION

- 11) Date and time of infection suspicion /diagnosis  
*(date of Q15 in GLOSS form - October 2017)*

|   |   |   |   |   |   |   |   |   |   |
|---|---|---|---|---|---|---|---|---|---|
| d | d | m | m | y | y | h | h | m | m |
|   |   |   |   |   |   |   |   |   |   |

*(unknown=99/99/99) (00:00-23:59 hrs)*

- 12) At suspicion/diagnosis of infection, which of the following vital signs were measured?
- |                     |                          |                          |
|---------------------|--------------------------|--------------------------|
|                     | No                       | Yes                      |
| a) Heart rate       | <input type="checkbox"/> | <input type="checkbox"/> |
| b) Respiratory rate | <input type="checkbox"/> | <input type="checkbox"/> |
| c) Blood pressure   | <input type="checkbox"/> | <input type="checkbox"/> |
| d) Temperature      | <input type="checkbox"/> | <input type="checkbox"/> |
| e) Mental status    | <input type="checkbox"/> | <input type="checkbox"/> |

- 13) How often were vital signs recorded in the following 24h after suspicion/diagnosis of infection ? *(tick one)*

- a) < 1x/24h
- b) 1-2x/24h
- c) every 8h
- d) at least every 6h

- 14) Professionals involved in the management of the woman in first 24h after suspicion/diagnosis of infection ?

- (tick all that apply)*
- a) Midwife
- b) Obstetrics specialist
- c) Obstetrician in training (resident)
- d) Internal Medicine specialist

- 16) List first three antimicrobials received for treatment of infection, date and start time *(refer to list)*  
*(Refer to Q24 in GLOSS form - October 2017)*

16.1) \_\_\_\_\_

|                                                                                                                                                                                             |                   |   |   |   |   |   |  |  |  |  |  |  |                                                                                                                                                      |   |   |   |   |  |  |  |  |
|---------------------------------------------------------------------------------------------------------------------------------------------------------------------------------------------|-------------------|---|---|---|---|---|--|--|--|--|--|--|------------------------------------------------------------------------------------------------------------------------------------------------------|---|---|---|---|--|--|--|--|
| <b>start date</b>                                                                                                                                                                           | <b>start time</b> |   |   |   |   |   |  |  |  |  |  |  |                                                                                                                                                      |   |   |   |   |  |  |  |  |
| <table border="1"><tr><td>d</td><td>d</td><td>m</td><td>m</td><td>y</td><td>y</td></tr><tr><td></td><td></td><td></td><td></td><td></td><td></td></tr></table><br><i>(unknown=99/99/99)</i> | d                 | d | m | m | y | y |  |  |  |  |  |  | <table border="1"><tr><td>h</td><td>h</td><td>m</td><td>m</td></tr><tr><td></td><td></td><td></td><td></td></tr></table><br><i>(00:00-23:59 hrs)</i> | h | h | m | m |  |  |  |  |
| d                                                                                                                                                                                           | d                 | m | m | y | y |   |  |  |  |  |  |  |                                                                                                                                                      |   |   |   |   |  |  |  |  |
|                                                                                                                                                                                             |                   |   |   |   |   |   |  |  |  |  |  |  |                                                                                                                                                      |   |   |   |   |  |  |  |  |
| h                                                                                                                                                                                           | h                 | m | m |   |   |   |  |  |  |  |  |  |                                                                                                                                                      |   |   |   |   |  |  |  |  |
|                                                                                                                                                                                             |                   |   |   |   |   |   |  |  |  |  |  |  |                                                                                                                                                      |   |   |   |   |  |  |  |  |

16.2) \_\_\_\_\_

|                                                                                                                                                                |                   |   |   |   |   |   |  |  |  |  |  |  |                                                                                                                          |   |   |   |   |  |  |  |  |
|----------------------------------------------------------------------------------------------------------------------------------------------------------------|-------------------|---|---|---|---|---|--|--|--|--|--|--|--------------------------------------------------------------------------------------------------------------------------|---|---|---|---|--|--|--|--|
| <b>start date</b>                                                                                                                                              | <b>start time</b> |   |   |   |   |   |  |  |  |  |  |  |                                                                                                                          |   |   |   |   |  |  |  |  |
| <table border="1"><tr><td>d</td><td>d</td><td>m</td><td>m</td><td>y</td><td>y</td></tr><tr><td></td><td></td><td></td><td></td><td></td><td></td></tr></table> | d                 | d | m | m | y | y |  |  |  |  |  |  | <table border="1"><tr><td>h</td><td>h</td><td>m</td><td>m</td></tr><tr><td></td><td></td><td></td><td></td></tr></table> | h | h | m | m |  |  |  |  |
| d                                                                                                                                                              | d                 | m | m | y | y |   |  |  |  |  |  |  |                                                                                                                          |   |   |   |   |  |  |  |  |
|                                                                                                                                                                |                   |   |   |   |   |   |  |  |  |  |  |  |                                                                                                                          |   |   |   |   |  |  |  |  |
| h                                                                                                                                                              | h                 | m | m |   |   |   |  |  |  |  |  |  |                                                                                                                          |   |   |   |   |  |  |  |  |
|                                                                                                                                                                |                   |   |   |   |   |   |  |  |  |  |  |  |                                                                                                                          |   |   |   |   |  |  |  |  |

16.3) \_\_\_\_\_

|                                                                                                                                                                |                   |   |   |   |   |   |  |  |  |  |  |  |                                                                                                                          |   |   |   |   |  |  |  |  |
|----------------------------------------------------------------------------------------------------------------------------------------------------------------|-------------------|---|---|---|---|---|--|--|--|--|--|--|--------------------------------------------------------------------------------------------------------------------------|---|---|---|---|--|--|--|--|
| <b>start date</b>                                                                                                                                              | <b>start time</b> |   |   |   |   |   |  |  |  |  |  |  |                                                                                                                          |   |   |   |   |  |  |  |  |
| <table border="1"><tr><td>d</td><td>d</td><td>m</td><td>m</td><td>y</td><td>y</td></tr><tr><td></td><td></td><td></td><td></td><td></td><td></td></tr></table> | d                 | d | m | m | y | y |  |  |  |  |  |  | <table border="1"><tr><td>h</td><td>h</td><td>m</td><td>m</td></tr><tr><td></td><td></td><td></td><td></td></tr></table> | h | h | m | m |  |  |  |  |
| d                                                                                                                                                              | d                 | m | m | y | y |   |  |  |  |  |  |  |                                                                                                                          |   |   |   |   |  |  |  |  |
|                                                                                                                                                                |                   |   |   |   |   |   |  |  |  |  |  |  |                                                                                                                          |   |   |   |   |  |  |  |  |
| h                                                                                                                                                              | h                 | m | m |   |   |   |  |  |  |  |  |  |                                                                                                                          |   |   |   |   |  |  |  |  |
|                                                                                                                                                                |                   |   |   |   |   |   |  |  |  |  |  |  |                                                                                                                          |   |   |   |   |  |  |  |  |

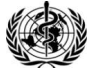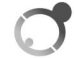

D) POSTPARTUM/POSTABORTION HAEMORRHAGE

17) Did the woman have postpartum /postabortion haemorrhage? No Yes

If No, go to Q24

17.1) If yes, Date and time of first symptoms/diagnosis

Grid for date and time: d d m m y y h h m m

18) Where was the diagnosis made? No Yes

- a) Community/home
b) Emergency room
c) Labour/abortion ward
d) Postnatal/postabortion ward
e) Theatre
f) Intensive care /high dependency unit
g) Other healthcare facility
h) During transfer to this facility
i) Other, specify:

19) Was blood lost measured/ estimated? No Yes

19.1) If yes, How much blood was lost within 24 hours?

20) How was blood loss estimated? No Yes

- a) Visual estimation
b) Direct collection and measurement
c) Direct collection and weighing
d) Blood sampling
e) Other

21) What was the cause of the haemorrhage? No Yes

- a) Uterine atony
b) Vaginal/perineal/cervical tear
c) Retained placenta/product of conception
d) Uterine infection
e) Uterine rupture
f) Extension of CS incision
g) Trauma
h) Coagulopathy
i) Unknown
j) Other

22) Did the woman receive medical treatment for postpartum/postabortion haemorrhage? No Yes

If No, go to Q25. If Yes, specify:

a) Oxytocin No Yes

a.1) Total dose (UI)

a.2) Route IM IV Unknown

b) Ergometrine No Yes

b.1) Total dose (mcg)

b.2) Route IM IV PO Unknown

c) Misoprostol No Yes

c.1) Total dose (mcg)

c.2) Route IM IV PO Unknown

23) Did the woman receive other treatments for postpartum/postabortion haemorrhage? No Yes

If No, go to Q24

If Yes, provide date and time

Table for other treatments: a) Balloon/condom tamponade, b) Uterine packing, c) Uterine compression sutures, d) Uterine artery embolization, e) Uterine artery ligation, f) Laparotomy, g) Blood products / transfusion, h) Central venous catheter, i) In-dwelling urinary catheter, j) Uterine massage, k) Manual revision of the uterus, l) Manual removal of the placenta, m) Fluids

(00:00-23:59 hrs)

E) PRE-ECLAMPSIA, ECLAMPSIA, HELLP

24) Was she a known hypertensive? Unknown No Yes

24.1) If yes, was the woman receiving any treatment?

Unknown No Yes

24.2) If yes, specify treatment:

24.3) If yes, was blood pressure controlled under treatment? Unknown No Yes

25) Did the woman have an acute episode of hypertension on admission/during this hospital stay? No Yes

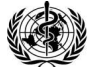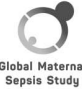

25.1) If yes, date and time acute episode started

Grid for date (d d m m y y) and time (h h m m) with instructions: (unknown=99/99/99) (00:00-23:59 hrs)

25.2) Highest blood pressure during acute episode SBP [ ][ ][ ] mmHg DBP [ ][ ][ ] mmHg

26) Did the woman have any hypertension-related complications? No [ ] Yes [ ] If No, go to 28

26.1) If Yes, provide date and time of first presentation

Grid for date and time of first presentation with list: a) Proteinuria, b) Epigastric pain, c) Headache, d) Oedema, e) Oliguria, f) Convulsions, g) Dyspnea, h) Cyanosis, i) Pulmonary oedema, j) Visual symptoms, k) Altered reflexes

27) Did the woman receive any interventions to manage hypertension? No [ ] Yes [ ] If No, go to 32

27.1) If Yes, provide date and time of initiation

Grid for date and time of initiation with list: a) Antihypertensives, b) Magnesium sulphate, c) Anticonvulsivants, d) Anticoagulants, e) Corticosteroids, f) Fluids, g) Blood sampling, h) Diuretics

F) OTHER COMPLICATIONS

28) Did the woman have any complication during hospital stay? (Refer to Q26 in GLOSS form) No [ ] Yes [ ] If No, go to Q18

28.1) If the woman had any of the following complications, date and time of diagnosis

Grid for date and time of diagnosis with list: a) Embolic disease, b) Obstructed labour / dystocia, c) Anaesthetic complication, d) Other surgical complications

29) Did the woman meet any of the near-miss criteria during hospital stay? No [ ] Yes [ ] If No, go to Q19 (Refer to Q29 in GLOSS form)

If Yes, specify below:

a) Cardiovascular dysfunction No [ ] Yes [ ] a.1) If Yes, date and time first criteria was met

Grid for date and time first criteria was met for Cardiovascular dysfunction

b) Respiratory dysfunction No [ ] Yes [ ] b.1) If Yes, date and time first criteria was met

Grid for date and time first criteria was met for Respiratory dysfunction

c) Renal dysfunction No [ ] Yes [ ] c.1) If Yes, date and time first criteria was met

Grid for date and time first criteria was met for Renal dysfunction

d) Coagulation dysfunction No [ ] Yes [ ] d.1) If Yes, date and time first criteria was met

Grid for date and time first criteria was met for Coagulation dysfunction

e) Hepatic dysfunction No [ ] Yes [ ] e.1) If Yes, date and time first criteria was met

Grid for date and time first criteria was met for Hepatic dysfunction

d) Neurologic dysfunction No [ ] Yes [ ] d.1) If Yes, date and time first criteria was met

Grid for date and time first criteria was met for Neurologic dysfunction

e) Uterine dysfunction No [ ] Yes [ ] e.1) If Yes, date and time first criteria was met

Grid for date and time first criteria was met for Uterine dysfunction

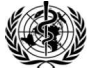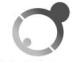

G) ADMISSION TO ICU OR HIGH DEPENDENCY CARE

30) Was the woman admitted to ICU or high dependency care? No Yes

(Refer to Q30 in GLOSS form - October 2017)

If No, go to question Q41

31) If Yes, date and time of admission

Grid for date and time of admission (ddmmyy hhmm)

32) What was the main diagnosis at admission to ICU/ high dependency unit?

- a) Haemorrhage
b) Pregnancy related hypertension
c) Infection
d) Other
d.1 If other, specify: (refer to list)

After suspicion/diagnosis of infection (date of Q15 in GLOSS form - October 2017)

33) Did the woman have hypotension (SBP<90mmHg/ SBP decrease of ≥40mmHg/ MAP<65mmHG) Unknown No Yes

34) Did the woman have a serum lactate ≥ 4 mmol/L? Unknown No Yes

34.1) If yes to Q33 or Q34, did the woman received crystalloids ≥30ml/Kg? (Ringer, exclud. glucose) Unknown No Yes

34.2) If crytaloids received, date and time of first administration (ddmmyy hhmm)

35) Did MAP rise to and remain ≥65 after initial fluid resuscitation? No Yes

36) Did MAP remain ≥65 without the use of vasopressors? No Yes

37) Central line inserted No Yes

37.1) If yes date and time (ddmmyy hhmm)

37.2) If yes, central venous pressure measured No Yes

37.3) If yes, central venous pressure ≥8 mm Hg No Yes

37.4) If yes date and time (ddmmyy hhmm)

38) Was passive leg raising test performed before initiation of fluid therapy? No Yes

39) Did the woman receive the following No Yes

- a) Vasopressors (applied for hypotension not responding to initial fluid resuscitation)
b) Hydrocortisone (applied for hypotension not responding to fluid resuscitation and vasopressor)
c) Insulin (applied when 2 consecutive blood glucose levels were >180)
d) Intravenous immunoglobulins
e) Antithrombin
f) Heparin
g) Erythropoietin
h) Stress ulcer prophylaxis (proton pump inhibitors, H2RAs)
i) Platelet transfusion received (with counts <10,000 mm3)
j) Thromboprophylaxis
k) Red blood cell transfusion received (with haemoglobin concentration <7.0 g/dL)
l) Fresh frozen plasma (received for correction of clotting abnormalities)
m) Any enteral feeding restriction
n) Parenteral nutrition

If woman admitted to ICU or high dependency care, complete daily record with data on day of admission, -1 and +1

|  <b>World Health Organization</b> |                        | GLOBAL MATERNAL SEPSIS STUDY - DEATHS AND NEARMISS                                |                                                                                                                     |             |                      | <br>Global Maternal Sepsis Study                         |                      |                                                |   |                                               |   |
|--------------------------------------------------------------------------------------------------------------------|------------------------|-----------------------------------------------------------------------------------|---------------------------------------------------------------------------------------------------------------------|-------------|----------------------|---------------------------------------------------------------------------------------------------------------------------------------------|----------------------|------------------------------------------------|---|-----------------------------------------------|---|
|                                                                                                                    |                        | INDIVIDUAL FORM - ALL WOMEN ADMITTED TO ICU OR HIGH DEPENDENCY CARE               |                                                                                                                     |             |                      |                                                                                                                                             |                      |                                                |   |                                               |   |
|                                                                                                                    |                        | Country code                                                                      | <input type="text"/>                                                                                                | Hospital ID | <input type="text"/> | Participant number                                                                                                                          | <input type="text"/> |                                                |   |                                               |   |
| Daily Record - Section H (March 2019 - 6/8 page)                                                                   |                        |                                                                                   |                                                                                                                     |             |                      |                                                                                                                                             |                      |                                                |   |                                               |   |
| Date                                                                                                               |                        |                                                                                   |                                                                                                                     |             |                      | Day -1<br>(immediate previous calendar day)                                                                                                 |                      | Day 0 (day of admission to ICU)<br>Same as Q35 |   | Day +1<br>(immediate subsequent calendar day) |   |
|                                                                                                                    |                        |                                                                                   |                                                                                                                     |             |                      | d                                                                                                                                           | d                    | m                                              | m | d                                             | d |
| 40. Record the most extreme value or corresponding answer at each calendar day                                     |                        |                                                                                   |                                                                                                                     |             |                      | Enter values below. Enter a dash (-) if not measured or unknown. If only measured once during a day record the unique value as lowest value |                      |                                                |   |                                               |   |
| <b>Clinical signs</b>                                                                                              | 40.1.a                 | (YES / NO)                                                                        | Altered mental status                                                                                               |             |                      |                                                                                                                                             |                      |                                                |   |                                               |   |
|                                                                                                                    | 40.1.b                 |                                                                                   | Lowest Glasgow Coma Score                                                                                           |             |                      |                                                                                                                                             |                      |                                                |   |                                               |   |
|                                                                                                                    | 40.2.a                 |                                                                                   | Highest temperature - °C                                                                                            |             |                      |                                                                                                                                             |                      |                                                |   |                                               |   |
|                                                                                                                    | 40.2.b                 |                                                                                   | Lowest temperature - °C                                                                                             |             |                      |                                                                                                                                             |                      |                                                |   |                                               |   |
|                                                                                                                    | 40.3.a                 | (breaths per minute)                                                              | Highest respiratory rate - bpm                                                                                      |             |                      |                                                                                                                                             |                      |                                                |   |                                               |   |
|                                                                                                                    | 40.3.b                 | (breaths per minute)                                                              | Lowest respiratory rate - bpm                                                                                       |             |                      |                                                                                                                                             |                      |                                                |   |                                               |   |
|                                                                                                                    | 40.4.a                 | (beats per minute)                                                                | Highest heart rate - bpm                                                                                            |             |                      |                                                                                                                                             |                      |                                                |   |                                               |   |
|                                                                                                                    | 40.4.b                 | (beats per minute)                                                                | Lowest heart rate - bpm                                                                                             |             |                      |                                                                                                                                             |                      |                                                |   |                                               |   |
|                                                                                                                    | 40.5.a                 |                                                                                   | Highest SBP - mmHg                                                                                                  |             |                      |                                                                                                                                             |                      |                                                |   |                                               |   |
|                                                                                                                    | 40.5.b                 |                                                                                   | Lowest SBP - mmHg                                                                                                   |             |                      |                                                                                                                                             |                      |                                                |   |                                               |   |
|                                                                                                                    | 40.6                   |                                                                                   | Lowest DBP - mmHg                                                                                                   |             |                      |                                                                                                                                             |                      |                                                |   |                                               |   |
|                                                                                                                    | 40.7                   | (YES / NO)                                                                        | Urine passing in 24h                                                                                                |             |                      |                                                                                                                                             |                      |                                                |   |                                               |   |
| 40.8                                                                                                               | (ml/24h)               | Urine output                                                                      |                                                                                                                     |             |                      |                                                                                                                                             |                      |                                                |   |                                               |   |
| 40.9                                                                                                               | (lowest O2 saturation) | Pulse-oxymetry (%)                                                                |                                                                                                                     |             |                      |                                                                                                                                             |                      |                                                |   |                                               |   |
| 40.1                                                                                                               | (YES / NO)             | O2 supplementation at time of pulse-oxymetry                                      |                                                                                                                     |             |                      |                                                                                                                                             |                      |                                                |   |                                               |   |
| <b>Hemogram</b>                                                                                                    | 40.11                  | (lowest value)                                                                    | g/dL Haemoglobin                                                                                                    |             |                      |                                                                                                                                             |                      |                                                |   |                                               |   |
|                                                                                                                    | 40.12                  | (lowest value)                                                                    | Hematocrit - %                                                                                                      |             |                      |                                                                                                                                             |                      |                                                |   |                                               |   |
|                                                                                                                    | 40.13                  |                                                                                   | WBC count - mm <sup>3</sup>                                                                                         |             |                      |                                                                                                                                             |                      |                                                |   |                                               |   |
|                                                                                                                    | 40.14                  | (highest value)                                                                   | % of immature neutrophils (bands)                                                                                   |             |                      |                                                                                                                                             |                      |                                                |   |                                               |   |
|                                                                                                                    | 40.15                  | (lowest value)                                                                    | Platelet count - x10 <sup>3</sup> ml                                                                                |             |                      |                                                                                                                                             |                      |                                                |   |                                               |   |
| <b>Gasometry</b><br>(enter lowest value)                                                                           | 40.16                  |                                                                                   | pH                                                                                                                  |             |                      |                                                                                                                                             |                      |                                                |   |                                               |   |
|                                                                                                                    | 40.17                  |                                                                                   | Lowest O2 saturation (%)                                                                                            |             |                      |                                                                                                                                             |                      |                                                |   |                                               |   |
|                                                                                                                    | 40.18                  |                                                                                   | Oxygen partial pressure (PaO2)                                                                                      |             |                      |                                                                                                                                             |                      |                                                |   |                                               |   |
|                                                                                                                    | 40.19                  |                                                                                   | PaCO2 - mmHg                                                                                                        |             |                      |                                                                                                                                             |                      |                                                |   |                                               |   |
|                                                                                                                    | 40.20                  |                                                                                   | Bicarbonate HCO3 - mEq/L                                                                                            |             |                      |                                                                                                                                             |                      |                                                |   |                                               |   |
|                                                                                                                    | 40.21                  |                                                                                   | Base excess                                                                                                         |             |                      |                                                                                                                                             |                      |                                                |   |                                               |   |
|                                                                                                                    | 40.22                  |                                                                                   | FiO2 at the time of gasometry                                                                                       |             |                      |                                                                                                                                             |                      |                                                |   |                                               |   |
| <b>Other laboratory exams</b><br>(enter highest value)                                                             | 40.23                  | (highest value)                                                                   | Bilirubin - mg/dL                                                                                                   |             |                      |                                                                                                                                             |                      |                                                |   |                                               |   |
|                                                                                                                    | 40.24                  |                                                                                   | Creatinine - mg/dL                                                                                                  |             |                      |                                                                                                                                             |                      |                                                |   |                                               |   |
|                                                                                                                    | 40.25                  |                                                                                   | Urea - mg/dL                                                                                                        |             |                      |                                                                                                                                             |                      |                                                |   |                                               |   |
|                                                                                                                    | 40.26                  |                                                                                   | Lactate - mg/dL                                                                                                     |             |                      |                                                                                                                                             |                      |                                                |   |                                               |   |
|                                                                                                                    | 40.27                  |                                                                                   | Glucose - mg/dL                                                                                                     |             |                      |                                                                                                                                             |                      |                                                |   |                                               |   |
|                                                                                                                    | 40.28                  |                                                                                   | PT (prothrombin time) - sec                                                                                         |             |                      |                                                                                                                                             |                      |                                                |   |                                               |   |
|                                                                                                                    | 40.29                  |                                                                                   | aPTT (activated partial thromboplastin time) - sec                                                                  |             |                      |                                                                                                                                             |                      |                                                |   |                                               |   |
|                                                                                                                    | 40.30                  |                                                                                   | CRP - mg/L                                                                                                          |             |                      |                                                                                                                                             |                      |                                                |   |                                               |   |
|                                                                                                                    | 40.31                  |                                                                                   | Procalcitonin test - µg/L                                                                                           |             |                      |                                                                                                                                             |                      |                                                |   |                                               |   |
|                                                                                                                    | 40.32                  |                                                                                   | Erythrocyte sedimentation rate                                                                                      |             |                      |                                                                                                                                             |                      |                                                |   |                                               |   |
| <b>Other clinical signs</b><br>(YES / NO)                                                                          | 40.33                  |                                                                                   | Decreased capillarity refill or mottling                                                                            |             |                      |                                                                                                                                             |                      |                                                |   |                                               |   |
|                                                                                                                    | 40.34                  |                                                                                   | Ileus (absent of bowel sounds)                                                                                      |             |                      |                                                                                                                                             |                      |                                                |   |                                               |   |
|                                                                                                                    | 40.35                  |                                                                                   | Jaundice                                                                                                            |             |                      |                                                                                                                                             |                      |                                                |   |                                               |   |
|                                                                                                                    | 40                     |                                                                                   | Fetal heart rate > 160 - bpm                                                                                        |             |                      |                                                                                                                                             |                      |                                                |   |                                               |   |
| <b>Management</b><br>(enter highest dosage/number)                                                                 | 40.37                  | (0=No, 1=<5 µg; 2=5-10 µg; 3=>10 µg/kg/min; 4=unknown dose)                       | Dopamine                                                                                                            |             |                      |                                                                                                                                             |                      |                                                |   |                                               |   |
|                                                                                                                    | 40.38                  | (0=No; 1=<0.1µg; 2=>0.1 µg/kg/min; 4=unknown dose)                                | Epinephrine or Norepinephrine                                                                                       |             |                      |                                                                                                                                             |                      |                                                |   |                                               |   |
|                                                                                                                    | 40.39                  | (YES / NO)                                                                        | Dobutamine                                                                                                          |             |                      |                                                                                                                                             |                      |                                                |   |                                               |   |
|                                                                                                                    | 40.40                  | (YES / NO)                                                                        | Vasopressin                                                                                                         |             |                      |                                                                                                                                             |                      |                                                |   |                                               |   |
|                                                                                                                    | 40.41                  | (0=NO; 1=nasal catheter; 2=facial mask; 3=non-invasive ventilation; 4=intubation) | Supplemental Oxygen                                                                                                 |             |                      |                                                                                                                                             |                      |                                                |   |                                               |   |
|                                                                                                                    | 40.42                  |                                                                                   | Received fluids in the event of SBP < 100mmHg<br>* excludes Glucose 5% (0=No, 1=<1L; 2=1-2L; 3=>2L; 4=unknown dose) |             |                      |                                                                                                                                             |                      |                                                |   |                                               |   |

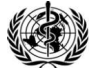

World Health Organization

GLOBAL MATERNAL SEPSIS STUDY - DEATHS AND NEARMISS

INDIVIDUAL FORM - ALL MATERNAL DEATHS WITH INFECTION

Country code [ ][ ] Hospital ID [ ][ ] Participant number [ ][ ]

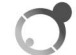

Global Maternal Sepsis Study

Section I/K - Complications (March 2019 - page 7/8)

I) PREGNANCY LOSS (ABORTION, ECTOPIC PREGNANCY)

41) Did the woman have an abortion or ectopic pregnancy? No Yes

(Refer to Q31 in GLOSS form - October 2017)

If No, go to Q44

41.1) Date symptoms started

Grid for date symptoms started (ddmmyy)

42) Expulsion of products of conception occurred before arrival in any health facility? Unknown No Yes

43) Did medical record indicate if this was an induced abortion? Unknown No Yes

J) IF THE WOMAN HAD A STILLBIRTH OR LIVEBIRTH

44) Did the woman had a caesarean section? No Yes

44.1) If yes, was caesarean section a) Emergency b) Planned

44.2) If yes, please provide indication: (refer to list)

45) Who performed the caesarean section? a) Obstetrics specialist b) Obstetrician in training (resident) c) Physician who can perform caesarean section d) Other

46) What technique was used for the caesarean delivery? a) Midline infraumbilical incision b) Vertical incision c) Transverse incision

47) Date and time woman was discharged from labour ward or recovery room after CS?

Grids for date and time of discharge (ddmmyy and hhmm)

K) IF WOMAN ENTERED THE STUDY POSTPARTUM

48) Did she give birth in this facility? Unknown No Yes

48.1) If yes, date and time of discharge after childbirth

Grids for date and time of discharge (ddmmyy and hhmm)

48.2) If yes, diagnosis at discharge

L) DEATH (leave blank if nearmiss)

49) Date and time of death (Refer to Q33 in GLOSS form - October 2017)

Grids for date and time of death (ddmmyy and hhmm)

50) Cause of death as in death certificate

a) Immediate cause Due to (or as a consequence of): b) Underlying cause Due to (or as a consequence of): c) Last cause Due to (or as a consequence of):

51) Was an autopsy performed? Unknown No Yes

51.1) If yes, main results of autopsy

52) Was the death classified using ICD system?

a) No b) Yes, using ICD 10 c) Yes, using ICD-MM

53) Please provide ICD codes as in facility registers

a) Primary cause b) Final cause of death c) Contributory (Antecedent) cause 1 d) Contributory (Antecedent) cause 2 e) Contributory (Antecedent) cause 3



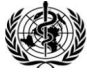

World Health Organization

GLOBAL MATERNAL SEPSIS STUDY - DEATHS AND NEARMISS

INDIVIDUAL FORM - ALL MATERNAL DEATHS WITH INFECTION

Country code [ ][ ][ ]

Hospital ID [ ][ ][ ]

Participant number [ ][ ][ ]

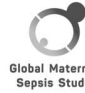

Comments (March 2019 - page 8/8)

COMMENTS

\_\_\_\_\_
\_\_\_\_\_
\_\_\_\_\_
\_\_\_\_\_
\_\_\_\_\_

Q16. Antimicrobials received (Refer to Q24 in GLOSS form)

Table with 2 columns: Antimicrobial name, and corresponding drug name. Includes Amikacin, Amoxicillin, Ampicillin, Azitromicin, Carbapenems, Cephalosporin (1st, 2nd gen), Cephalosporin (3rd, 4th gen), Ciprofloxacin, Clarithromycin, Clindamycin, Co-amoxiclav, Doxycycline, Erythromycin, Gentamycin, Linezolid, Methicillin/ Oxacillin, Metronidazole, Penicilin G, Norfloxacin, Nitrofurantoin, Piperacillin, Piperacilina/tazobactam, Polymyxin B/Colistin, Vancomycin.

Q37. Diagnosis at admission to ICU

Table with 2 columns: Condition, and corresponding diagnosis. Includes Cardiac disease, Haemorrhage, Pregnancy related hypertension, Eclampsia/HELLP, Acute respiratory failure, Pulmonary oedema, Infection, Diabetic ketoacidosis, Liver disease, Renal disease, Embolism, Cerebrovascular accident, Trauma, Anesthesia complications.

Q47.2. Indications of caesarean section

- Suspected fetal growth impairment
Fetal distress
Fetal death
Prelabour rupture of membranes
Chorioamnionitis
Pre-eclampsia/eclampsia
Gestational age 41 completed or more
3rd trimester vaginal bleeding
Cephalopelvic disproportion
Failure to progress/labour dystocia
Multiple pregnancy
Suspected/imminent uterine rupture
Postmortem CS
Previous CS
Breech or other malpresentation
Failed induction
Maternal request
HIV positive
Previously repaired vesico-vaginal/recto-vaginal fistula
Previous uterine surgery

Instructions

- a) This form is composed of sections. The target population of each section is specified in the section title
b) Sections or questions may be skipped considering the individual participant. Do not leave blank fields except if indicated
c) Mark the most appropriate answer with an X
d) Please use code list provided to complete free text cells in questions Q16, Q37, Q47.2
If response not in the list, please add correct response
e) Information is to be obtained from hospital records or by questioning the attending staff for any missing information

Data Collector's name and date of closure of the individual forms:

\_\_\_\_\_ [d][d][m][m][y][y]

Data Entry Operator's name and date:

\_\_\_\_\_ [d][d][m][m][y][y]

**Figure S2: Maternal death and near-miss review clinical summary form template**

|                                                    |                                   |
|----------------------------------------------------|-----------------------------------|
| <b>Admission to hospital (final point of care)</b> | <b>Main reason for admission:</b> |
|----------------------------------------------------|-----------------------------------|

|                                                      |                                                              |
|------------------------------------------------------|--------------------------------------------------------------|
| <b>Timing of chain of events</b>                     | <b>Patient code:</b>                                         |
|                                                      | <b>Date and time of admission at first point of care:</b>    |
|                                                      | <b>Date and time of admission to GLOSS facility/study:</b>   |
|                                                      | <b>Date and time of suspicion or diagnosis of infection:</b> |
|                                                      | <b>Date and time of first antibiotics:</b>                   |
|                                                      | <b>Date and time of abortion or delivery:</b>                |
|                                                      | <b>Date and time of ICU admission:</b>                       |
|                                                      | <b>Date and time of theatre admission:</b>                   |
|                                                      | <b>Date and time of death:</b>                               |
| <b>Time elapsed between complication* and death:</b> |                                                              |

\*Complication is defined as the first near-miss criteria such as respiratory-, cardiovascular-, renal, coagulation, neurologic, hepatic and uterine dysfunction.

|                                                         |                                                                                              |                         |                       |
|---------------------------------------------------------|----------------------------------------------------------------------------------------------|-------------------------|-----------------------|
| <b>Maternal characteristics and obstetrical history</b> | <b>Patient Age:</b>                                                                          | <b>Marital status:</b>  |                       |
|                                                         | <b>Gravida:</b>                                                                              | <b>Para:</b>            | <b>Live children:</b> |
|                                                         | <b>Number of previous caesarean sections:</b>                                                | <b>Date of last CS:</b> |                       |
|                                                         | <b>Number of ANC visits in this pregnancy:</b>                                               |                         |                       |
|                                                         | <b>Risk factor(s)/complications detected during this pregnancy/labour/postpartum period:</b> |                         |                       |
| <b>Case summary presented to the committee</b>          |                                                                                              |                         |                       |

|                                                              |                                                                     |                                |
|--------------------------------------------------------------|---------------------------------------------------------------------|--------------------------------|
| <b>Admission details to Facility 1 (first point of care)</b> | <b>Date:</b>                                                        |                                |
|                                                              | <b>Reason for coming to hospital:</b>                               |                                |
|                                                              | <b>Pregnant on admission?</b>                                       | <b>Duration of amenorrhea:</b> |
|                                                              | <b>Alive baby?</b>                                                  |                                |
|                                                              | <b>Complications occurred?</b>                                      |                                |
|                                                              | <b>Referred from another institution?</b>                           | <b>Type of institution?</b>    |
|                                                              | <b>History of the referral/process of reaching the institution:</b> |                                |

|                                         |                                     |
|-----------------------------------------|-------------------------------------|
| <b>Admission details GLOSS Facility</b> | <b>Date:</b>                        |
| <b>Admission details GLOSS Facility</b> | <b>Main reason for admission:</b>   |
|                                         | <b>Diagnosis made at admission:</b> |

|  |                                                                                 |                             |
|--|---------------------------------------------------------------------------------|-----------------------------|
|  | <b>If delivered/aborted before admission:</b>                                   | <b>Date:</b>                |
|  | <b>Place of birth/abortion?</b>                                                 | <b>Assisted by:</b>         |
|  | <b>Alive baby?</b>                                                              |                             |
|  | <b>Complications occurred?</b>                                                  |                             |
|  | <b>Referred from another institution?</b>                                       | <b>Type of institution?</b> |
|  | <b>Initial clinical assessment/Ultrasound/laboratory findings at admission:</b> |                             |

|                                                                      |                                                                                             |
|----------------------------------------------------------------------|---------------------------------------------------------------------------------------------|
| <b>Summary of the case evolution at GLOSS facility</b>               | <b>Summary of the case evolution if complication(s) occurred after admission:</b>           |
|                                                                      | <b>Complications:</b>                                                                       |
|                                                                      | <b>Clinical assessment/Ultrasound/laboratory findings:</b>                                  |
|                                                                      | <b>Hemogram:</b>                                                                            |
|                                                                      | <b>Other labs:</b>                                                                          |
|                                                                      | <b>Diagnosis:</b>                                                                           |
|                                                                      | <b>Complementary tests and laboratory results after treatment:</b>                          |
|                                                                      | <b>Summary of case evolution and monitoring put in place (t°, BP, Pulse, and Bleeding):</b> |
| <b>Date of death:</b>                                                |                                                                                             |
| <b>Time elapsed between complication and death:</b>                  |                                                                                             |
| <b>Cause of death notified in records:</b>                           |                                                                                             |
| <b>Pregnancy outcome (Live birth, SB, Early death, Miscarriage):</b> |                                                                                             |

|                                    |                                                           |
|------------------------------------|-----------------------------------------------------------|
| <b>Other information available</b> | <b>From family, health centers, community, etc.: None</b> |
|------------------------------------|-----------------------------------------------------------|

| <b>Tentative ICD-MM Coding</b>                          |  |
|---------------------------------------------------------|--|
| ICD-MM Code                                             |  |
| Title of group                                          |  |
| Direct cause of death                                   |  |
| Antecedent cause of death/due to or as a consequence of |  |
| ICD-MM Coding                                           |  |

Figure S3: Note taking form for GLOSS external review meeting

| Case ID                                                                                                                                                                        |                  |                    |                           |                    |         |
|--------------------------------------------------------------------------------------------------------------------------------------------------------------------------------|------------------|--------------------|---------------------------|--------------------|---------|
| What is your main diagnosis for this case?                                                                                                                                     |                  |                    |                           |                    |         |
| Case management problems (CMP) related to:                                                                                                                                     | Severity of CMP  |                    |                           |                    |         |
|                                                                                                                                                                                | N/A <sup>1</sup> | Minor <sup>2</sup> | Intermediate <sup>3</sup> | Major <sup>4</sup> | Comment |
| <b><i>Before referral or admission to hospital</i></b>                                                                                                                         |                  |                    |                           |                    |         |
| woman's ANC unsatisfactory (onset and quantity)                                                                                                                                |                  |                    |                           |                    |         |
| received unskilled antenatal care (care from traditional birth attendants)                                                                                                     |                  |                    |                           |                    |         |
| high risk status (with 1 or more known pre-existing condition).<br><i>For example, gestational or chronic hypertension or diabetes, anemia, HIV and other chronic diseases</i> |                  |                    |                           |                    |         |
| <b><i>Referral to hospital</i></b>                                                                                                                                             |                  |                    |                           |                    |         |
| referral delayed (>1 referral or >30 mins interval)                                                                                                                            |                  |                    |                           |                    |         |
| transport not "medicalized" (not an ambulance)                                                                                                                                 |                  |                    |                           |                    |         |
| <b><i>Establishing a diagnosis/monitoring</i></b>                                                                                                                              |                  |                    |                           |                    |         |
| initial clinical examination unsatisfactory                                                                                                                                    |                  |                    |                           |                    |         |
| initial laboratory assessment unsatisfactory                                                                                                                                   |                  |                    |                           |                    |         |
| main diagnosis wrong                                                                                                                                                           |                  |                    |                           |                    |         |
| main diagnosis delayed                                                                                                                                                         |                  |                    |                           |                    |         |
| main diagnosis incomplete                                                                                                                                                      |                  |                    |                           |                    |         |
| <b>Diagnostic discrepancies classification (see below)</b>                                                                                                                     |                  |                    |                           |                    |         |
| subsequent clinical examination unsatisfactory                                                                                                                                 |                  |                    |                           |                    |         |
| subsequent laboratory assessment unsatisfactory                                                                                                                                |                  |                    |                           |                    |         |
| secondary diagnosis wrong                                                                                                                                                      |                  |                    |                           |                    |         |

<sup>1</sup> N/A: Not applicable as it did not occur in this case

<sup>2</sup> Minor: Not directly relevant for maternal survival or avoidance of long-term maternal morbidity

<sup>3</sup> Intermediate: Some relevance for maternal survival or avoidance of long-term maternal morbidity

<sup>4</sup> Major: Immediate danger for maternal survival or avoidance of long-term maternal morbidity

|                                                                      |  |  |  |  |  |
|----------------------------------------------------------------------|--|--|--|--|--|
| secondary diagnosis incomplete                                       |  |  |  |  |  |
| <b>Diagnostic discrepancies class (see below for classification)</b> |  |  |  |  |  |
| monitoring insufficient                                              |  |  |  |  |  |
| others _____                                                         |  |  |  |  |  |
| <b>Treatment</b>                                                     |  |  |  |  |  |
| <b>infection</b>                                                     |  |  |  |  |  |
| culture missing                                                      |  |  |  |  |  |
| culture incomplete                                                   |  |  |  |  |  |
| antibiotics delayed                                                  |  |  |  |  |  |
| antibiotics missing                                                  |  |  |  |  |  |
| antibiotics incomplete                                               |  |  |  |  |  |
| antibiotics wrong/not ideal                                          |  |  |  |  |  |
| antibiotics overuse/ regimen too broad                               |  |  |  |  |  |
| antibiotics unnecessary                                              |  |  |  |  |  |
| antibiotics resistance detected in culture                           |  |  |  |  |  |
| post-culture antibiotics adjustment unsatisfactory                   |  |  |  |  |  |
| prophylactic antibiotics for medical procedure missing               |  |  |  |  |  |
| others _____                                                         |  |  |  |  |  |
| <b>general</b>                                                       |  |  |  |  |  |
| drug delayed                                                         |  |  |  |  |  |
| drug missing                                                         |  |  |  |  |  |
| drug overdosed                                                       |  |  |  |  |  |
| drug underdosed                                                      |  |  |  |  |  |
| drug unnecessary                                                     |  |  |  |  |  |
| drug wrong/not ideal                                                 |  |  |  |  |  |
| intravenous replacement fluids delayed                               |  |  |  |  |  |
| intravenous replacement fluids missing                               |  |  |  |  |  |
| intravenous replacement fluids wrong/not ideal                       |  |  |  |  |  |

|                                                       |  |  |  |  |  |
|-------------------------------------------------------|--|--|--|--|--|
| intravenous replacement fluids insufficient           |  |  |  |  |  |
| intravenous replacement fluids unnecessary            |  |  |  |  |  |
| blood transfusion delayed                             |  |  |  |  |  |
| blood transfusion missing                             |  |  |  |  |  |
| blood product transfused wrong/not ideal              |  |  |  |  |  |
| blood transfused insufficient                         |  |  |  |  |  |
| blood transfusion unnecessary                         |  |  |  |  |  |
| procedure delayed                                     |  |  |  |  |  |
| procedure missing                                     |  |  |  |  |  |
| procedure carried out unsatisfactorily                |  |  |  |  |  |
| procedure wrong                                       |  |  |  |  |  |
| procedure unnecessary                                 |  |  |  |  |  |
| ICU/HDU transfer delayed                              |  |  |  |  |  |
| ICU/HDU transfer missing                              |  |  |  |  |  |
| other _____                                           |  |  |  |  |  |
| <b>Managing team or other</b>                         |  |  |  |  |  |
| managing team incomplete                              |  |  |  |  |  |
| other _____                                           |  |  |  |  |  |
| <b>Additional documents</b>                           |  |  |  |  |  |
| autopsies done for deaths                             |  |  |  |  |  |
| death certificate issued                              |  |  |  |  |  |
| internal death review /confidential enquiry conducted |  |  |  |  |  |
| other _____                                           |  |  |  |  |  |

**Case summary:**

**Summary of case discussion:**

**Recommendations:**

**Diagnostic discrepancies are classified as major or minor.**

**Major discrepancies are classified as class I or class II.**

- *Class I refers to discrepancies in which the knowledge of the correct diagnosis before death would have led to changes in clinical management that could have prolonged survival or cured the patient (e.g., pyogenic meningitis treated as eclampsia).*
- *In class II errors, patient survival would have not been modified (e.g., fulminant hepatitis treated as sepsis).*

**Minor discrepancies involved minor diagnoses and are classified as**

- *Class III (non-diagnosed diseases with symptoms that should have been treated—e.g., mild aspiration pneumonia in a patient with eclampsia) and,*
- *Class IV (non-diagnosed diseases with possible epidemiological or genetic importance—e.g., schistosomal infections).*
- *Correctly diagnosed patients are classified as class V.*
- *Class VI comprised non-classifiable cases (autopsy unsatisfactory or with no clear diagnosis).*

### Glossary

ANC – Antenatal Care

CMP- Case management problems

ICU- Intensive Care Unit

HDU- High Dependency Unit

**Table S1: | Reported performance of maternal death review process in 20 of 25 participating facilities prior to the GLOSS study**

|                                                              | Yes      | No       | Unsure  | Missing |
|--------------------------------------------------------------|----------|----------|---------|---------|
|                                                              | n(%)     | n(%)     | n(%)    | n(%)    |
| <b><i>Formal System exists to review maternal deaths</i></b> |          |          |         |         |
| National level                                               | 12(60.0) | 5(25.0)  | 1(5.0)  | 2(10.0) |
| District level                                               | 12(60.0) | 4(20.0)  | 1(5.0)  | 3(15.0) |
| Facility level                                               | 14(70.0) | 5(25.0)  | 0       | 1(5.0)  |
| <b><i>Formal system exists to review</i></b>                 |          |          |         |         |
| Maternal near-miss                                           | 10(50.0) | 6(30.0)  | 1(5.0)  | 3(15.0) |
| Stillbirths                                                  | 10(50.0) | 4(20.0)  | 2(10.0) | 4(20.0) |
| Neonatal deaths                                              | 16(80.0) | 0        | 2(10.0) | 2(10.0) |
| <b><i>Presence of MDR guidelines</i></b>                     | 17(85.0) | -        | 1(5.0)  | 2(10.0) |
| <b><i>All maternal deaths are reviewed</i></b>               | 12(66.7) | 6(33.3)  | n/a     | n/a     |
| <b><i>Who attends MDR meetings by function (N=18)</i></b>    |          |          |         |         |
| Steering committee only                                      | 7(38.9)  | 11(61.1) | n/a     | n/a     |
| Ad-hoc committee                                             | 6(33.3)  | 12(66.7) | n/a     | n/a     |
| Staff involved in case management                            | 13(72.2) | 5(27.7)  | n/a     | n/a     |
| Community representatives                                    | 3(16.7)  | 15(83.3) | n/a     | n/a     |
| Open to all staff                                            | 8(44.4)  | 10(55.6) | n/a     | n/a     |
| Others                                                       | 7(38.9)  | 11(61.1) | n/a     | n/a     |
| <b><i>Source of information used for MDR</i></b>             |          |          |         |         |
| Case notes (includes partograph and nursing charts)          | 18(90.0) | 2(10.0)  | n/a     | 3(15.0) |
| Facility registers                                           | 16(80.0) | 1(5.0)   | n/a     | 3(15.0) |
| Death registers                                              | 9(45.0)  | 8(40.0)  | n/a     | 3(15.0) |
| Death certificates                                           | 9(45.0)  | 8(40.0)  | n/a     | 3(15.0) |
| Antenatal/MCH cards                                          | 13(65.0) | 5(25.0)  | n/a     | 2(10.0) |
| Staff interviews                                             | 11(55.0) | 6(30.0)  | n/a     | 3(15.0) |
| Family/Community Interviews                                  | 11(55.0) | 7(35.0)  | n/a     | 2(10.0) |



|                                                                                            |          |          |         |         |
|--------------------------------------------------------------------------------------------|----------|----------|---------|---------|
| Community Records                                                                          | 3(15.0)  | 15(75.0) | n/a     | 2(10.0) |
| None                                                                                       | 0        | 17(85.0) | n/a     | 3(15.0) |
| Others                                                                                     | 2(10.0)  | 15(75.0) | n/a     | 3(15.0) |
| <b><i>Type of written documentation produced during maternal death review meetings</i></b> |          |          |         |         |
| Standardized forms                                                                         | 12(60.0) | 5(25.0)  | n/a     | 3(15.0) |
| Written minutes for each case                                                              | 13(65.0) | 4(20.0)  | n/a     | 3(15.0) |
| Summaries with recommendations and action points                                           | 15(75.0) | 2(10.0)  | n/a     | 3(15.0) |
| Standard doc for presenting to mgt                                                         | 8(40.0)  | 9(45.0)  | n/a     | 3(15.0) |
| Annual report with findings from the previous year                                         | 5(25.0)  | 12(60.0) | n/a     | 3(15.0) |
| <b><i>Findings dissemination channels</i></b>                                              |          |          |         |         |
| Displayed (for example on wall charts or posters)                                          | 6(30.0)  | 11(55.0) | n/a     | 3(15.0) |
| Staff Meeting                                                                              | 10(50.0) | 7(35.0)  | n/a     | 3(15.0) |
| Factsheets                                                                                 | 4(20.0)  | 13(65.0) | n/a     | 3(15.0) |
| Newsletters/ Bulletins                                                                     | 1(5.0)   | 16(80.0) | n/a     | 3(15.0) |
| Electronic messages                                                                        | 2(10.0)  | 15(75.0) | n/a     | 3(15.0) |
| Press release or media                                                                     | 1(5.0)   | 16(80.0) | n/a     | 3(15.0) |
| Scientific articles                                                                        | 1(5.0)   | 16(80.0) | n/a     | 3(15.0) |
| Website                                                                                    | 1(5.0)   | 16(80.0) | n/a     | 3(15.0) |
| Official hospital channels                                                                 | 4(20.0)  | 13(65.0) | n/a     | 3(15.0) |
| Meetings with community leaders or members                                                 | 2(10.0)  | 15(75.0) | n/a     | 3(15.0) |
| Others                                                                                     | 5(25.0)  | 12(60.0) | n/a     | 3(15.0) |
| <b><i>Individuals assigned to follow up on specific recommendations</i></b>                |          |          |         |         |
|                                                                                            | 15(75)   | 2(10.0)  | n/a     | 2(10.0) |
| <b><i>Implementation tracked by a written documentation system</i></b>                     |          |          |         |         |
|                                                                                            | 9(45.0)  | 9(45.0)  | n/a     | 2(10.0) |
| <b><i>Review committee is linked to facility quality Improvement activities</i></b>        |          |          |         |         |
|                                                                                            | 12(60.0) | 4(20.0)  | 2(10.0) | 2(10.0) |

**Table S2 | Distribution of modifiable factors by case**

| Case No                   | Prior to arrival at the GLOSS facility | Clinical & laboratory examination | Diagnosis | Management | Managing team | Other factors | Total modifiable factors / case N=151 |
|---------------------------|----------------------------------------|-----------------------------------|-----------|------------|---------------|---------------|---------------------------------------|
| <b>Maternal deaths</b>    |                                        |                                   |           |            |               |               |                                       |
| MD 1                      | 0                                      | 2                                 | 2         | 2          | 0             | 0             | 6                                     |
| MD 2                      | 3                                      | 0                                 | 1         | 2          | 0             | 0             | 6                                     |
| MD 3                      | 1                                      | 4                                 | 1         | 4          | 1             | 0             | 11                                    |
| MD 4                      | 2                                      | 1                                 | 1         | 3          | 0             | 0             | 7                                     |
| MD 5                      | 0                                      | 2                                 | 0         | 2          | 0             | 1             | 5                                     |
| MD 6                      | 1                                      | 2                                 | 1         | 2          | 0             | 0             | 6                                     |
| MD 7                      | 1                                      | 2                                 | 1         | 5          | 0             | 0             | 9                                     |
| MD 8                      | 0                                      | 2                                 | 1         | 2          | 1             | 0             | 6                                     |
| MD 9                      | 1                                      | 0                                 | 1         | 1          | 0             | 0             | 3                                     |
| MD 10                     | 1                                      | 2                                 | 1         | 2          | 1             | 0             | 7                                     |
| MD 11                     | 3                                      | 3                                 | 2         | 3          | 1             | 0             | 12                                    |
| MD 12 <sup>1</sup>        | -                                      | -                                 | -         | -          | -             | -             | -                                     |
| MD 13                     | 0                                      | 0                                 | 1         | 5          | 0             | 1             | 7                                     |
| <b>Maternal near-miss</b> |                                        |                                   |           |            |               |               |                                       |
| NM1                       | 0                                      | 0                                 | 0         | 1          | 0             | 0             | 1                                     |
| NM 2                      | 1                                      | 1                                 | 0         | 1          | 0             | 0             | 3                                     |
| NM 3                      | 0                                      | 0                                 | 2         | 3          | 1             | 0             | 6                                     |
| NM 4                      | 0                                      | 1                                 | 1         | 1          | 0             | 0             | 3                                     |
| NM 5                      | 1                                      | 2                                 | 1         | 2          | 0             | 0             | 6                                     |
| NM 6                      | 2                                      | 3                                 | 1         | 1          | 0             | 0             | 7                                     |
| NM 7                      | 0                                      | 0                                 | 1         | 1          | 0             | 0             | 2                                     |
| NM 8                      | 2                                      | 0                                 | 2         | 1          | 0             | 0             | 5                                     |
| NM 9                      | 0                                      | 0                                 | 0         | 0          | 0             | 0             | 0                                     |
| NM 10                     | 0                                      | 0                                 | 0         | 1          | 0             | 0             | 1                                     |
| NM 11                     | 0                                      | 1                                 | 0         | 1          | 0             | 0             | 2                                     |
| NM 12                     | 1                                      | 0                                 | 0         | 0          | 0             | 0             | 1                                     |
| NM 13                     | 0                                      | 1                                 | 0         | 1          | 0             | 0             | 2                                     |
| NM 14                     | 2                                      | 1                                 | 0         | 4          | 0             | 0             | 7                                     |
| NM 15                     | 1                                      | 2                                 | 1         | 2          | 0             | 1             | 7                                     |
| NM 16                     | 0                                      | 1                                 | 1         | 0          | 1             | 0             | 3                                     |
| NM 17                     | 0                                      | 3                                 | 0         | 2          | 0             | 0             | 5                                     |
| NM 18                     | 0                                      | 0                                 | 1         | 0          | 0             | 0             | 1                                     |
| NM 19                     | 2                                      | 1                                 | 1         | 0          | 0             | 0             | 4                                     |

MD = Maternal death; NM = Near-miss  
GLOSS=Global Sepsis Study

<sup>1</sup>Death occurred within the first hour of presentation before the managing team commenced clinical management

**Table S3 | Summary of the causes of maternal deaths**

| <b>Case No</b>    | <b>Cause of death from facility records</b>                                      | <b>Direct cause of death assigned in the review process</b>                        | <b>Antecedent cause assigned in the review process</b>                                                                                                                      | <b>ICD MM coding assigned in the review process</b> |
|-------------------|----------------------------------------------------------------------------------|------------------------------------------------------------------------------------|-----------------------------------------------------------------------------------------------------------------------------------------------------------------------------|-----------------------------------------------------|
| MD 1              | Not assigned                                                                     | Obstetric death of unspecified cause                                               | Other maternal infectious and parasitic diseases complicating pregnancy, childbirth and the puerperium (viral hepatitis)                                                    | Group 8/<br>O95/O98.4                               |
| MD 2              | Endometritis post-abortion complicated by septic shock                           | Shock following abortion (circulatory collapse)<br>Septic shock following abortion | Genital tract and pelvic infection following abortion and ectopic and molar pregnancy (Endometritis)                                                                        | Group 1/<br>O08.3/O08.0<br>(R57.2)/O08.1            |
| MD 3              | Bowel obstruction post cesarean complicated with shock                           | Puerperal sepsis (septic shock)                                                    |                                                                                                                                                                             | Group 4/O85                                         |
| MD 4              | Cardiorespiratory arrest; Multiorgan failure<br>Refractory septic shock          | Septic shock (Circulatory collapse), multiple organ failure                        | Puerperal sepsis (Uterine infection)<br>Postpartum coagulation defects<br>Postpartum - Hepatorenal syndrome following labour and delivery                                   | Group 2/<br>O85/O72.3 /O90.4                        |
| MD 5 <sup>6</sup> | Acute Pulmonary Embolism                                                         | Obstetric pulmonary embolism                                                       | Puerperal sepsis (peritonitis)                                                                                                                                              | Group 5/<br>O88.2/O85/ O98.7                        |
| MD 6              | Infection                                                                        | Incomplete spontaneous abortion complicated by genital tract and pelvic infection  | Diseases of the respiratory system (Respiratory tract Infection)<br>Possible pre-eclampsia                                                                                  | Group 1/<br>O08.0/O99.5/ O14                        |
| MD 7              | Disseminated Intravascular Coagulation (DIC)<br>Septic abortion<br>Severe anemia | Hemorrhagic shock (Circulatory collapse)                                           | Delayed or excessive hemorrhage following abortion and ectopic and molar pregnancy<br>Genital tract and pelvic infection following abortion and ectopic and molar pregnancy | Group 1/<br>O08.1/O08.0/<br>O02.1                   |

<sup>6</sup> Contributory cause of death assigned: HIV complicating pregnancy and childbirth

| <b>Case No</b> | <b>Cause of death from facility records</b>                                                                 | <b>Direct cause of death assigned in the review process</b>        | <b>Antecedent cause assigned in the review process</b>                           | <b>ICD MM coding assigned in the review process</b> |
|----------------|-------------------------------------------------------------------------------------------------------------|--------------------------------------------------------------------|----------------------------------------------------------------------------------|-----------------------------------------------------|
|                |                                                                                                             |                                                                    | Missed abortion. Early fetal death with retention of dead fetus                  |                                                     |
| MD 8           | Infection                                                                                                   | Septic shock                                                       | Infections of kidney in pregnancy (pyelonephritis)                               | Group 4/<br>R57.2/O23.0                             |
| MD 9           | Immediate cause: complications of spinal anesthesia<br>Underlying cause: congenital heart disease           | Complications of anesthesia during labor and delivery              | Preexisting disease of the respiratory system (Congenital heart disease, asthma) | Group 6/O74                                         |
| MD 10          | Infection                                                                                                   | Septic shock                                                       | Sepsis<br>Cardiomyopathy                                                         | Group 4/ O85/I42                                    |
| MD 11          | Infection                                                                                                   | Septic shock<br>Delayed or excessive hemorrhage following abortion | Failed attempted abortion                                                        | Group 1/<br>R57.2/O08.1/O07                         |
| MD 12          | Not assigned                                                                                                | Septic shock                                                       | Puerperal sepsis (Uterine infection)                                             | Group 4/O85                                         |
| MD 13          | Immediate cause: Post abortion sepsis<br>Underlying cause: Severe pneumonia<br>Last cause: Cushing syndrome | Septic shock following abortion                                    | Incomplete abortion complicated by genital tract and pelvic infection            | Group 1/<br>R57.2/O08.0                             |
